# Supplementary material for: Discovery of a Small Molecule to Increase Cardiomyocytes and Protect the Heart After Ischemic Injury
Source: PubMed Central journal article supplement — JACC Basic Transl Sci. 2018 Nov 12;3(5):639–53. doi: 10.1016/j.jacbts.2018.07.005 (PMC6234526; doi:10.1016/j.jacbts.2018.07.005), 2018-11-12
Supplement: mmc1.pdf [file mmc1.pdf]

1 **SUPPLEMENTAL MATERIAL**

2

3 **Methods**

4 **Chemical compounds and reagents**

5 Recombinant human Neuregulin 1 (WAKO, #080-09001), fibroblast growth factor 1 (WAKO, #067-  
6 05371), BIO (Tocris, #3194), and sulforaphane (LKT, #S8044) were purchased from each of the listed  
7 manufacturers. The library of chemicals that were screened was provided by the Chemical Biology  
8 Screening Center at Tokyo Medical and Dental University. The purity of each chemical from the library  
9 was greater than 90%.

10

11 **Cell cultures**

12 Human embryonic kidney 293 (HEK293) cells, human retinal pigment epithelial ARPE-19 cells, and  
13 mouse fibroblast NIH3T3 cells were cultured at 37°C in DMEM media (Sigma) supplemented with  
14 10% fetal calf serum (FCS). Human umbilical vein endothelial cells (HUVECs) were cultured at 37°C  
15 in Endothelial Cell Growth Medium (EGM) (Lonza) supplemented with EGM™-2 SingleQuots  
16 Supplements and Growth Factors (Lonza).

17

18 **Isolation of neonatal CMs and non-CMs**

19 Primary neonatal rat CMs were prepared from 1-day-old Wistar rats (Takasugi Experimental Animal  
20 Supply Co.) as previously described (1). The isolated and dispersed cardiac cells were incubated for 80  
21 minutes to remove non-CMs. The unattached viable cells, which were rich in CMs, were cultured on  
22 gelatin-coated dishes at 37°C in DMEM media supplemented with 10% fetal calf serum (FCS) for 24  
23 hours. Non-CMs that attached to the dishes were cultured in DMEM media supplemented with 10%  
24 FCS and allowed to grow to confluence.

25

26 **Fluorescence reporter-based assay for YAP-TEADs activators**

27 ARPE-19 cells were transfected with the pLL3.7-K122 FH-YAP1-ires-GFP-TEADs-responsive-  
28 promoter-H2B-mCherry reporter using Lipofectamine 2000 (Thermo Fisher Scientific). The YAP1-  
29 expressing ARPE-19 cells were treated with 10 µM of each compound for 72 hours and then fixed. The  
30 nucleus was visualized with Hoechst 33342, and the H2B-mCherry signal inside the nucleus was  
31 measured with ArrayScan VTI (Thermo Fisher Scientific). The assay system is described in more detail  
32 elsewhere (2).

33

34 **Sphere formation assay for TAZ activators**

1 Sphere formation assay was performed as previously described (3). Briefly, human breast epithelial  
2 MCF10A cells expressing TAZ (MCF10A-TAZ) were prepared using a pLenti-EF-FH-TAZ-ires-blast  
3 lentivirus vector with blasticidin selection. MCF10A-TAZ cells were plated in 96-well Ultra Low  
4 Attachment plates (Corning) and cultured with 10  $\mu$ M of each compound for 10 days in serum-free  
5 DMEM/F-12 (Thermo Fisher Scientific) containing 10 ng/ml basic fibroblast growth factor, 20 ng/ml  
6 epidermal growth factor, 5  $\mu$ g/ml insulin, and 0.4% bovine serum albumin. TAZ activators enabled  
7 TAZ-expressing MCF10A cells to form spheres, and a cell aggregate with a diameter of more than 150  
8  $\mu$ m was defined as a sphere.

9

### 10 **Luciferase assay**

11 The TEADs reporter assay for 50 putative TAZ activators was performed with HEK293 cells. HEK293  
12 cells were transfected with the 8xGT-IIC- $\delta$ 51LucII (TEADs reporter) (4), pCMV-alkaline phosphatase  
13 (a gift from Sumiko Watanabe), and pFLAG-YAP1 (5) plasmids using Lipofectamine 2000 (Thermo  
14 Fisher Scientific). The YAP-expressing HEK293 cells were treated with 10  $\mu$ M of each compound for  
15 24 hours and harvested. Luciferase activity and alkaline phosphatase activity, as an internal control,  
16 were assayed with PicaGene (Toyo Ink) and CDP-star (Roche), respectively, and measured by a  
17 microplate-reading luminometer (Wallac ARVO MX 1420; PerkinElmer).

18 For the luciferase reporter assays in CMs, 8xGTIIC-luciferase reporter (Addgene #34615)  
19 (6) and pGL4.49[luc2P/TCF-LEF/Hygro] vectors (Promega) were transfected using Nucleofector™ 2b  
20 (Lonza). After 24 hours, cells were starved (0.1% FCS) for 6 hours and subsequently treated with 10  
21  $\mu$ M of each compound for 40 hours. Dual luciferase activities were measured with the Dual Luciferase  
22 Assay System (Promega) on a microplate-reading luminometer (Wallac ARVO MX 1420; PerkinElmer).  
23 Reporter activities were normalized to the measured Renilla luciferase activity of pRL-SV40.

24

### 25 **Cell proliferation assay**

26 To detect DNA synthesis in proliferating cells, cells were incubated with 5  $\mu$ M 5-ethynyl-2'-  
27 deoxyuridine (EdU) under starved conditions (0.1% FCS). After 40 hours, incorporated EdU in CMs  
28 was stained with the Click-iT® EdU detection reagent (Thermo Fisher Scientific) and cardiac troponin  
29 T antibody (Thermo Fisher Scientific). To detect nuclear division (karyokinesis) and cell division  
30 (cytokinesis), cells were stained with antibodies against phosphohistone H3 (pH3) (Millipore) and  
31 aurora B kinase (Cell Signaling), respectively. Cytokinesis was defined by the presence of an aurora B-  
32 stained spindle-shaped structure in the middle of the intercellular bridge. The assays were visualized  
33 and evaluated using an IN Cell Analyzer 1000 (GE Healthcare) or Olympus FSX 100 fluorescence  
34 microscope (Olympus). All images were analyzed using Adobe Photoshop (sizing, brightness, contrast

1 adjustments, etc.). Brightness and contrast were adjusted linearly across the entirety of each image.

### 3 **Cell area analysis**

4 CM size was automatically determined by measuring the surface area of more than 2,500 cells stained  
5 with a cardiac troponin T antibody using an IN Cell Analyzer 1000 (GE Healthcare).

### 7 **MTS cell viability assay**

8 CMs under starved conditions (0.1% FCS) were incubated with the indicated compounds or 100  $\mu$ M  
9 hydrogen peroxide (H<sub>2</sub>O<sub>2</sub>; positive control) for 40 hours, and then cell viability was evaluated using a  
10 CellTiter 96® Aqueous One Solution Cell Proliferation Assay kit (Promega) and a microplate-reading  
11 luminometer (Wallac ARVO MX 1420; PerkinElmer).

### 13 **Analysis of nuclear translocation of YAP and TAZ**

14 Cultured CMs were double-stained with antibodies against cardiac troponin T (Thermo Fisher  
15 Scientific) and YAP antibody (Novus Biologicals) or TAZ antibody (Cell Signaling). Nuclei were  
16 counterstained with Hoechst 33342. CM nuclei with a strong YAP or TAZ signal were defined as  
17 follows: nuclear/cytoplasmic fluorescence intensity ratio of YAP or TAZ was greater than 2, which was  
18 analyzed using an automated Operetta High-Content Imaging System (PerkinElmer).

### 20 ***in vitro* reactive oxygen species (ROS) assay**

21 CMs were incubated with 100  $\mu$ M of an oxidation-sensitive fluorescent probe 2'7'-dichlorofluorescein  
22 diacetate (DCFH-DA; Sigma) for 60 minutes, and then excessive amounts methylglyoxal (a precursor  
23 of advanced glycation end-products; 100  $\mu$ M) was added for 90 minutes to induce ROS production.  
24 The DCFH-DA probe was converted to highly fluorescent 2,7-dichlorofluorescein (DCF) upon ROS-  
25 mediated oxidation, and the cell fluorescence was measured using a microplate-reading luminometer  
26 (Wallac ARVO MX 1420; PerkinElmer).

### 28 **Generation of adenoviruses with CM-specific expression**

29 A genomic fragment extending from -497 to +172 bp of Rat cardiac troponin T (*Tnnt2*) promoter was  
30 obtained by PCR using rat genomic DNA (7). The promoter fragment was the subcloned into KpnI/SalI-  
31 digested pShuttle vector (Agilent, #240005), and human growth hormone (hGH) polyA signal  
32 sequences were cloned at the C-terminus (pShuttle-*tnnt2* vector). cDNA fragments coding for Fucci  
33 cell cycle indicators were extracted from pFucci-G1 Orange vector (MBL Life science, #AM-V9001M),  
34 pFucci-S/G2/M Green vector (MBL Life science, #AM9014M), respectively, and then subcloned into

1 the pShuttle-*tnnt2* vector. Adenoviruses for CM-specific gene expression were generated using  
2 AdEasy™ Adenoviral Vector System (Agilent), according to the manufacture's instructions.

3

#### 4 **CM cell cycle analysis**

5 For CM cell cycle analysis, CMs were infected with the CM-specific Fucci expression adenoviruses,  
6 *Tnnt2*-Fucci G1 Orange and *Tnnt2*-Fucci S/G2/M Green, at 2 and 10 MOI (multiplicity of infection),  
7 respectively, and evaluated 72 hours after incubation using an IN Cell Analyzer 1000 (GE Healthcare).  
8 Nuclei with green (Azami-Green1; mAG1) and/or red (Kusabira-Orange2; mKO2) fluorescence were  
9 automatically detected. Fucci-expressing CMs were categorized as mono- or binucleated CMs based  
10 on the distance between adjacent nuclei. Mono- or binucleated CMs were further classified as cells in  
11 the G1-phase, G1/S-transition, or S/G2/M-phase, depending on red, yellow (both red and green), or  
12 green fluorescence in the nuclei, respectively.

13

#### 14 **RNA isolation and quantitative real-time PCR**

15 Total RNA from cultured cells was extracted using a RNeasy Mini Kit (Qiagen). Reverse transcription  
16 was performed with 1 µg of total RNA, random hexamers, and reverse transcriptase (ReverTraAce,  
17 TOYOBO). Real-time PCR was performed using FastStart Essential DNA Green Master (Roche) in a  
18 LightCycler 480 System II (Roche). The expression level of each gene was normalized to that of 18S  
19 rRNA. The sequences of the PCR primers are available upon request.

20

#### 21 **siRNA-mediated knockdown of neonatal rat CMs**

22 siRNA for *Nfe2l2* (*Nrf2*) (Thermo Fisher Scientific, RSS343557), and control siRNA (Thermo Fisher  
23 Scientific, 12935-112) were transfected using the HiPerFect reagent (Qiagen) at a final concentration  
24 of 30 nM under starved conditions (0.1% FCS).

25

#### 26 **Western blot analysis**

27 Nuclear and cytoplasmic fractions were separated using a LysoPure Nuclear and Cytoplasmic Extractor  
28 Kit (Wako). Extracted proteins were separated by SDS-PAGE and transferred electrophoretically to  
29 polyvinylidene fluoride (PVDF) membranes (Millipore). The primary antibodies used included YAP  
30 (Cell Signaling), YAP (Abnova), TAZ (Cell Signaling), β-catenin (BD Transduction), active β-catenin  
31 (Millipore), GSK3β (Cell Signaling), phospho-GSK3β (Tyr216) (Abcam), phospho-p44/42 MAPK  
32 (ERK1/2) (Thy202/Thy204) (Cell Signaling), p44/42 MAPK (ERK1/2) (Cell Signaling), phospho-Akt  
33 (Ser473) (Cell Signaling), Akt (Cell Signaling), Cleaved Caspase 3 (Cell Signaling), NRF2 (Santa Cruz),  
34 KEAP1 (Santa Cruz), Actin (Abcam), GAPDH (Cell Signaling), and Lamin A/C (Sigma). Membranes

1 were exposed to horseradish peroxidase (HRP)-conjugated secondary antibodies, and signals were  
2 detected by the Pierce ECL Plus Western Blotting Substrate (Thermo Fisher Scientific). Densitometric  
3 analysis of proteins on western blots was performed with ImageJ software (NIH) and normalized to the  
4 indicated internal control proteins.

### 6 **Coimmunoprecipitation assay**

7 HEK293 cells were transfected with the pCDNA3-Myc3-Nrf2 (a gift from Yue Xiong, Addgene plasmid  
8 # 21555) (8) and pcDNA3-HA2-Keap1 (a gift from Yue Xiong, Addgene plasmid # 21556) (8) plasmids  
9 using Lipofectamine 2000 (Thermo Fisher Scientific). Forty-eight hours later, the NRF2-KEAP1-  
10 overexpressing HEK293 cells were treated with 10  $\mu$ M of TT-10 for 2 hours and harvested. Cells were  
11 lysed in immunoprecipitation buffer (50 mM Tris-HCl pH 7.5, 150 mM NaCl, 1% NP-40, 0.5% sodium  
12 deoxycholate, 1 mM EDTA, protease inhibitor cocktail (Roche), and phosphatase inhibitor cocktail  
13 (Roche)). Fifty micrograms of cell lysates were immunoprecipitated with mouse IgG, anti-MYC-tag  
14 (MBL Life science) or anti-HA-tag (Santa Cruz) antibody. In immunoblots, 5  $\mu$ g of cell lysates (Input)  
15 and immunoprecipitates (IP) were probed for NRF2 and KEAP1 using anti-MYC-tag (MBL Life  
16 science) and anti-HA-tag (Santa Cruz) antibodies, respectively.

### 18 **RNA-Seq**

19 High quality RNA from cultured CMs was sequenced. RNA-seq libraries were constructed according  
20 to the Illumina protocol and sequenced on a HiSeq 2500 instrument as previously described (9). The  
21 reads per kilobase per million mapped reads (RPKM) method was employed to normalize gene  
22 expression.

### 24 **Heatmap Generation and GO Cluster Analysis**

25 Differentially expressed genes were selected based on the criteria that 1) RPKM value ranges between  
26 mean  $\pm$  SE did not overlap in two groups, 2) RPKM values of all samples were more than 3.25, and 3)  
27 the maximum difference between samples was more than 3.25. Genes were clustered by Cluster 3.0  
28 software including  $\log_2$ -transform. The clustering was visualized in a heatmap using Java TreeView  
29 1.1.6r4 software. Official gene symbols of selected genes were subjected to the Database for Annotation,  
30 Visualization and Integrated Discovery (DAVID) Functional Classification Tool (URL:  
31 <https://david.ncifcrf.gov/summary.jsp>) (10) to obtain biological processes related to the genes. We  
32 presented GO terms under biological process ranked in the top 9.

### 34 **MI model**

1 MI was performed as previously described (11). MI mice were randomly assigned in a 1:1 ratio to  
2 receive vehicle or TT-10 after the MI procedure, according to each experimental protocol as described  
3 in detail elsewhere. Briefly, mice were anesthetized by intraperitoneal injection of 2,2,2-  
4 tribromoethanol (Sigma) (250 mg/kg body weight) and inhalation of 1% isoflurane. A 23-gauge  
5 polyethylene tube was inserted into the trachea, and the animals were ventilated using a volume-cycled  
6 rodent ventilator. The chest cavity was opened via incision through the left third intercostal space. The  
7 left anterior descending artery (LAD) was doubly ligated by 8-0 nylon suture approximately 1.5 mm  
8 below the tip of the left atrial appendage. The occlusion was confirmed by a change in color (paler  
9 appearance) of the anterior wall of the left ventricle. Sham-operated mice underwent the identical  
10 surgical procedure without LAD ligation.

11

### 12 **Lineage tracing of existing CMs**

13 Lineage tracing experiments of existing CMs were performed to evaluate clonal proliferation.  *$\alpha$ MHC-*  
14 *MerCreMer; Rosa26<sup>tbw/+</sup>* mice were injected intraperitoneally with a single low dose of tamoxifen  
15 (Sigma; 5 mg/kg body weight) dissolved in corn oil (Wako). After Cre-mediated recombination, one of  
16 the three fluorescent marker proteins (mOrange, mCerulean, and mCherry) was stochastically placed  
17 under the control of CAG promoter. mOrange was the brightest and most easily detected using an  
18 Olympus FSX 100 fluorescence microscope (Olympus), Olympus BX 51 fluorescence microscope  
19 (Olympus), and Zeiss LSM 510 META Confocal Microscope (Carl Zeiss). Thus, we selected mOrange-  
20 expressing CMs for subsequent analysis. Mice were randomized to receive vehicle or TT-10 in a 1:1  
21 ratio after MI operation. Approximately 3% of existing CMs irreversibly expressed mOrange after  
22 tamoxifen treatment, and approximately 2% of mOrange-labeled CMs in MI (-) mice formed a cluster  
23 1 week after sham operation, which presumably consisted of both simply adjacent CMs and  
24 spontaneously divided CMs. The increase in the proportion of clustered labeled CMs was considered  
25 to be attributed to the additional proliferation of existing CMs (clonal expansion) after MI and TT-10  
26 treatment, and evaluated. Horizontal sections of the ventricles were freshly embedded in OCT  
27 compound, sectioned at a thickness of 10  $\mu$ m, and collected at 700- $\mu$ m intervals. Digital images of 5  
28 different sections were captured and evaluated. All images were analyzed using Adobe Photoshop  
29 (sizing, brightness, contrast adjustments, etc.). Brightness and contrast were adjusted linearly across the  
30 entirety of each image.

31

### 32 **Echocardiography**

33 Two dimensional (2D) guided M-mode echocardiography was performed using an a VisualSonics Vevo  
34 2100 echocardiogram. LV diastolic anterior wall (AWth) thickness, LV end-diastolic dimensions

1 (LVDD), and LV end-systolic dimensions (LVDs) were measured. LV end-diastolic volumes (LVEDV)  
2 and LV end-systolic volumes (LVESV) were estimated using the Teichholz method, and ejection  
3 fraction (%EF) was calculated as  $(LVEDV-LVESV)/LVEDV \times 100$ .

#### 4 5 **Measurement of CM diameter and nuclear density**

6 CM diameter and nuclear density were evaluated on Periodic acid-Shiff (PAS)-stained horizontal  
7 sections as previously described (12). The diameter was calculated by measuring the short axis when  
8 the visualized CM were circular-shaped with the nucleus. The mean CM size was determined from at  
9 least 100 cells.

#### 10 11 **Histological analysis**

12 Heart sections were prepared as previously described (1) and stained with hematoxylin and eosin for  
13 overall morphology. The antibodies used for immunohistochemical (IHC) staining included  
14 phosphohistone H3 (pH3) (Millipore), aurora B kinase (Cell Signaling), YAP (Novus Biologicals),  
15 phospho-histone H2AX (Ser139) ( $\gamma$ H2AX) (Cell Signaling), troponin I (Abcam) and troponin T  
16 (Thermo Fisher Scientific). Apoptotic cells were detected by terminal deoxynucleotidyl transferase-  
17 mediated dUTP nick-end labeling (TUNEL) assay (Roche Diagnostics). All IHC staining was  
18 visualized and evaluated using an Olympus FSX 100 fluorescence microscope (Olympus), Olympus  
19 BX 51 fluorescence microscope (Olympus), or Zeiss LSM 510 META Confocal Microscope (Carl  
20 Zeiss). All images were analyzed using Adobe Photoshop (sizing, brightness, contrast adjustments, etc.).  
21 Brightness and contrast were adjusted linearly across the entirety of each image.

#### 22 23 **Measurement of *in vivo* ROS production**

24 Horizontal sections of the ventricles were freshly embedded in OCT compound, sectioned at a thickness  
25 of 10  $\mu$ m, and collected at 700- $\mu$ m intervals. Sections were stained with CellROX Green Reagent  
26 (Thermo Fisher Scientific) and cardiac troponin T antibody (Thermo Fisher Scientific). All IHC staining  
27 was visualized using an Olympus BX 51 fluorescence microscope (Olympus) and digital images of 5  
28 different regions were captured. Nuclei of the infarct border-zone myocardium or MI (-) mouse  
29 myocardium were marked by DAPI and mean CellROX fluorescence intensity on those nuclei was  
30 calculated using ImageJ software (NIH). Brightness and contrast of inset images were adjusted linearly  
31 across the entirety of each image using ImageJ software (NIH).

#### 32 33 **Data availability**

34 All the data supporting the findings of this study are available within the article and its Online Data

1 Supplement or from the corresponding author upon reasonable request. RNA-seq data were deposited  
2 in the GEO (Gene Expression Omnibus) database at the US National Center for Biotechnology  
3 Information (NCBI) under accession number GSE95274.

## 4 5 **General procedure for the synthesis of analogues of TAZ-12**

### 6 **Synthesis of TAZ-12**

7 *t*-BuOK (1.09 g, 9.71 mmol) was added to a solution of allyl isothiocyanate (453.1  $\mu$ L, 4.43 mmol) and  
8 cyanamide (188.1 mg, 4.43 mmol) in THF (17 mL) under an argon atmosphere at 0°C. After stirring at  
9 0 °C to room temperature (rt) for 30 minutes, 2-bromo-1-(5-chlorothiophen-2-yl)ethan-1-one (1.01 g,  
10 4.22 mmol) was added the solution at 0 °C rinsed with THF, and stirred at rt. After 10 hours, the reaction  
11 mixture was diluted with cyclopentyl methyl ether (CPME), and quenched with H<sub>2</sub>O. The mixture was  
12 extracted with EtOAc, washed with brine, dried over MgSO<sub>4</sub>, and concentrated *in vacuo*. The residue  
13 was purified by silica gel column chromatography (n-hexane/EtOAc = 1/1) to give TAZ-12 as a yellow  
14 solid (581 mg, 46%).

15 **General:** All reactions were carried out under an inert atmosphere of dry argon, unless the reaction  
16 procedure states otherwise. Column chromatography was performed with silica gel 60 (40-50  $\mu$ m)  
17 purchased from Merck. Tetrahydrofuran (THF) was purchased from Kanto Chemical Co. Inc. The  
18 purity of compounds was determined by HPLC analysis and <sup>1</sup>H NMR (minimum purity >99%). The  
19 HPLC analysis was performed on a JASCO LC-2000 series instrument equipped with a normal-  
20 phase column (Senshu, Pegasil Silica SP100, 4.6  $\phi$  x 250 mm, 5  $\mu$ m) at 27°C with UV detection at 254  
21 nm. NMR spectra were recorded on a Bruker AVANCE III HD spectrometer (500 MHz for <sup>1</sup>H and 125  
22 MHz for <sup>13</sup>C). Chemical shifts are expressed in  $\delta$  (ppm) values, and coupling constants are expressed  
23 in hertz (Hz). The following abbreviations are used: s = singlet, d = doublet, t = triplet, q = quartet, m  
24 = multiplet, brs = broad singlet and brd = broad doublet. The value was determined with respect to  
25 tetramethylsilane for <sup>1</sup>H (<sup>1</sup>H( $\delta$ ) = 0.00 ppm) and solvent for <sup>1</sup>H (CDCl<sub>3</sub>: <sup>1</sup>H( $\delta$ ) = 7.26 ppm, DMSO-d<sub>6</sub>:  
26 <sup>1</sup>H( $\delta$ ) = 2.50 ppm), <sup>13</sup>C (CDCl<sub>3</sub>: <sup>13</sup>C( $\delta$ ) = 77.16 ppm, DMSO-d<sub>6</sub>: <sup>13</sup>C( $\delta$ ) = 39.52 ppm). IR spectra were  
27 obtained on a JASCO FT/IR-4700 spectrophotometer. ESI-MS was taken on a Bruker micrOTOF-II  
28 spectrometer.

29  
30 TAZ-12

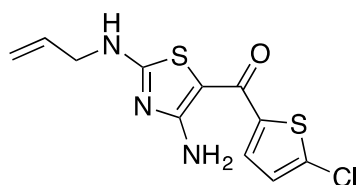



1 Following the general procedure, the titled compound was obtained as a yellow solid (581 mg, 46%  
2 yield).  
3 HPLC (Pegasil Silica SP100, hexane/EtOAc= 50/50, flow rate 1.0 ml/min,  $\lambda = 254$  nm)  $t_r = 12.90$  min,  
4 purity >99%;  $^1\text{H}$  NMR (500 MHz, DMSO- $d_6$ )  $\delta$  9.02 (brs, 1H), 8.49–8.09 (br, 1H), 7.31 (d,  $J = 4.0$  Hz,  
5 1H), 7.17 (d,  $J = 4.3$  Hz, 1H), 5.89 (ddd,  $J = 17.1, 10.4, 5.2$  Hz, 1H), 5.23 (dd,  $J = 17.1, 1.2$  Hz, 1H),  
6 5.16 (dd,  $J = 10.4, 1.2$  Hz, 1H), 3.96 (brs, 2H) (1 proton is missing.);  $^{13}\text{C}$  NMR (125 MHz, DMSO- $d_6$ )  
7  $\delta$  170.5, 167.8, 146.4, 133.7, 133.1, 128.1 (2C), 127.3, 116.4, 89.8, 46.2; IR (ATR) 2362, 2335, 1584,  
8 1543, 1414, 1005  $\text{cm}^{-1}$ ; mp: 182–186  $^\circ\text{C}$ ; HRMS calcd for  $\text{C}_{11}\text{H}_{10}\text{ClN}_3\text{OS}_2\text{Na}$   $[\text{M}+\text{Na}]^+$  321.9846, found  
9 321.9855. Anal. Calcd for  $\text{C}_{11}\text{H}_{10}\text{ClN}_3\text{OS}_2$ : C, 44.07; H, 3.36; N, 14.02%; found C, 43.86; H, 3.50; N,  
10 13.76%.

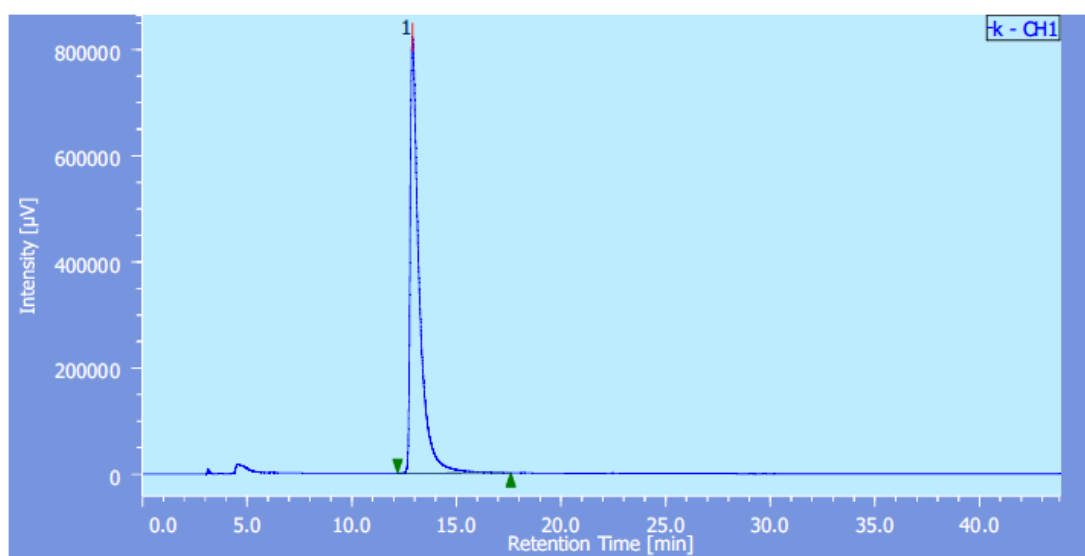

11  
12

13 TT-1

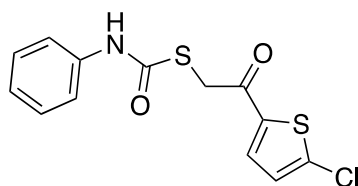

14

15 *t*-BuOK (302 mg, 2.69 mmol) was added to a solution of phenyl isothiocyanate (145.9 mg, 1.22 mmol)  
16 and cyanamide (52 mg, 1.22 mmol) in THF (4.3 mL) under an argon atmosphere at 0 $^\circ\text{C}$ . After stirring  
17 at 0  $^\circ\text{C}$  to room temperature (rt) for 30 minutes, 2-bromo-1-(5-chlorothiophen-2-yl)ethan-1-one (279.3  
18 mg, 1.17 mmol) was added the solution at 0  $^\circ\text{C}$  rinsed with THF, and stirred at rt. After 10 hours, the  
19 reaction mixture was diluted with cyclopentyl methyl ether (CPME), and quenched with  $\text{H}_2\text{O}$ . The  
20 mixture was extracted with EtOAc, washed with brine, dried over  $\text{MgSO}_4$ , and concentrated *in vacuo*.  
21 The residue was purified by silica gel column chromatography (n-hexane/EtOAc = 2/1 to 1/1) to give

1 TT-16 (Rf = 0.4; n-hexane/EtOAc = 1/1) as a yellow solid (75 mg, 19% yield) and TT-1 (Rf = 0.6; n-  
2 hexane/EtOAc = 1/1) as a red solid (87 mg, 24% yield).

3 <sup>1</sup>H NMR (500 MHz, DMSO-d<sub>6</sub>) δ 10.5 (brs, 1H), 8.05 (d, *J* = 4.3 Hz, 1H), 7.46 (d, *J* = 7.6 Hz, 2H),  
4 7.36 (d, *J* = 4.3 Hz, 1H), 7.30 (dd, *J* = 8.5, 7.3 Hz, 2H), 7.05 (dd, *J* = 7.3, 7.3 Hz, 1H), 4.43 (s, 2H); <sup>13</sup>C  
5 NMR (125 MHz, DMSO-d<sub>6</sub>) δ 186.6, 163.4, 141.3, 138.7, 138.1, 134.3, 129.1(2C), 128.9(2C), 123.6,  
6 118.9, 35.7; HRMS (ESI) calcd for C<sub>13</sub>H<sub>10</sub>NO<sub>2</sub>S<sub>2</sub>ClNa [M+Na]<sup>+</sup> 333.9734, found 333.9721; Anal. Calcd  
7 for C<sub>13</sub>H<sub>10</sub>NO<sub>2</sub>S<sub>2</sub>Cl: C, 50.08; H, 3.23; N, 4.49%, found C, 49.98; H, 3.47; N, 4.43%.

8

9 TT-5

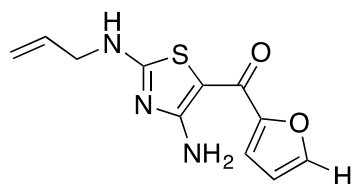

10

11 *t*-BuOK (150 mg, 1.34 mmol) was added to a solution of allyl isothiocyanate (63 μL, 683.3 μmol) and  
12 cyanamide (26 mg, 683.3 μmol) in DMF (2.1 mL) under an argon atmosphere at 0°C. After stirring at  
13 0 °C to room temperature (rt) for 30 minutes, 2-bromo-1-(furan-2-yl)ethan-1-one (123 mg, 650.8 μmol)  
14 was added the solution at 0 °C rinsed with DMF, and stirred at rt. After 10 hours, the reaction mixture  
15 was diluted with cyclopentyl methyl ether (CPME), and quenched with H<sub>2</sub>O. The mixture was extracted  
16 with EtOAc, washed with brine, dried over MgSO<sub>4</sub>, and concentrated *in vacuo*. The residue was purified  
17 by silica gel column chromatography (n-hexane/EtOAc = 1/1) to give TT-5 as a yellow solid (51.1 mg,  
18 31% yield).

19 <sup>1</sup>H NMR (500 MHz, CDCl<sub>3</sub>) δ 7.55 (dd, *J* = 1.8, 0.6 Hz, 1H), 7.16 (dd, *J* = 3.7, 0.6 Hz, 1H), 6.53 (dd,  
20 *J* = 3.7, 1.5 Hz, 1H), 5.93 (brs, 1H), 5.93 (ddd, *J* = 17.1, 10.1, 5.5 Hz, 1H), 5.35 (dd, *J* = 17.1, 2.8, 1.5  
21 Hz, 1H), 5.28 (dd, *J* = 10.4, 2.8, 1.2 Hz, 1H), 3.98 (brs, 2H), 1.61 (brs, 2H); <sup>13</sup>C NMR (125 MHz,  
22 CDCl<sub>3</sub>) δ 180.2, 170.9, 166.8, 153.5, 144.3, 132.5, 118.2, 114.3, 112.3, 92.5, 47.8; IR (ATR) 3127,  
23 2358, 1533, 1410 cm<sup>-1</sup>; mp 198 °C; HRMS (ESI) calcd for C<sub>11</sub>H<sub>11</sub>N<sub>3</sub>O<sub>2</sub>SNa [M+H]<sup>+</sup> 250.0645, found  
24 250.0648.

25

26 TT-6

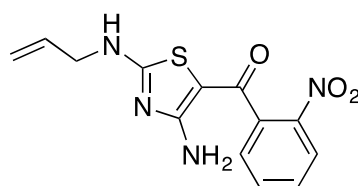

27

28 *t*-BuOK (258.1 mg, 2.30 mmol) was added to a solution of allyl isothiocyanate (107.4 μL, 1.05 mmol)

1 and cyanamide (44.6 mg, 1.05 mmol) in THF (2.7 mL) under an argon atmosphere at 0°C. After stirring  
2 at 0 °C to room temperature (rt) for 30 minutes, 2-bromo-1-(2-nitrophenyl)ethan-1-one (244 mg, 1.00  
3 mmol) was added the solution at 0 °C rinsed with THF, and stirred at rt. After 10 hours, the reaction  
4 mixture was diluted with cyclopentyl methyl ether (CPME), and quenched with H<sub>2</sub>O. The mixture was  
5 extracted with EtOAc, washed with brine, dried over MgSO<sub>4</sub>, and concentrated *in vacuo*. The residue  
6 was purified by silica gel column chromatography (n-hexane/EtOAc = 1/1 to 1/2) to give TT-6 as a  
7 yellow solid (110 mg, 36% yield).

8 <sup>1</sup>H NMR (500 MHz, DMSO-d<sub>6</sub>) δ 8.87 (brs, 1H), 8.02 (dd, *J* = 8.2, 0.9 Hz, 1H), 7.96 (brs, 1H), 7.77  
9 (ddd, *J* = 7.6, 7.6, 1.2 Hz, 1H), 7.67 (ddd, *J* = 7.9, 7.9, 1.5 Hz, 1H), 7.60 (dd, *J* = 7.3, 1.5 Hz, 1H), 6.20  
10 (brs, 1H), 5.85 (m, 1H), 5.18 (ddd, *J* = 17.1, 3.4, 1.5 Hz, 1H), 5.13 (ddd, *J* = 10.1, 3.1, 1.5 Hz, 1H), 3.89  
11 (brs, 1H) (1 proton is missing.); <sup>13</sup>C NMR (125 MHz, DMSO-d<sub>6</sub>) δ 178.1, 166.0, 146.7, 137.3, 133.9,  
12 130.4, 128.4(2C), 124.4(2C), 116.4, 93.1, 59.8; IR (ATR) 2359, 1512, 1412, 1343 cm<sup>-1</sup>; HRMS (ESI)  
13 calcd for C<sub>13</sub>H<sub>12</sub>N<sub>4</sub>O<sub>3</sub>SNa [M+Na]<sup>+</sup> 327.0522, found 327.0522.

14  
15 TT-9

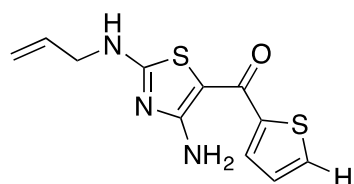

17 *t*-BuOK (4.00 g, 35.7 mmol) was added to a solution of allyl isothiocyanate (1.67 mL, 16.3 mmol) and  
18 cyanamide (684.2 mg, 16.3 mmol) in DMF (55 mL) under an argon atmosphere at 0°C. After stirring  
19 at 0 °C to room temperature (rt) for 30 minutes, 2-bromo-1-(thiophen-2-yl)ethan-1-one (3.18 g, 15.5  
20 mmol) was added the solution at 0 °C rinsed with DMF (2 mL), and stirred at rt. After 10 hours, the  
21 reaction mixture was diluted with cyclopentyl methyl ether (CPME), and quenched with H<sub>2</sub>O. The  
22 mixture was extracted with EtOAc, washed with brine, dried over MgSO<sub>4</sub>, and concentrated *in vacuo*.  
23 The residue was purified by silica gel column chromatography (n-hexane/EtOAc = 1/1 to 1/2) to give  
24 TT-9 as a yellow solid (1.61 g, 39% yield).

25 <sup>1</sup>H NMR (500 MHz, CDCl<sub>3</sub>) δ 7.62 (dd, *J* = 3.7, 0.9 Hz, 1H), 7.51 (dd, *J* = 4.9, 1.2 Hz, 1H), 7.10 (dd,  
26 *J* = 5.2, 3.7 Hz, 1H), 5.92 (brs, 1H), 5.92 (ddd, *J* = 17.1, 10.4, 5.5 Hz, 1H), 5.35 (dd, *J* = 17.1, 2.8, 1.8  
27 Hz, 1H), 5.28 (dd, *J* = 10.1, 2.4, 1.2 Hz, 1H), 3.97 (dd, *J* = 5.2, 5.2, 2H), 1.59 (brs, 2H); <sup>13</sup>C NMR (125  
28 MHz, CDCl<sub>3</sub>) δ 175.2, 172.3, 166.2, 146.5, 132.4, 130.6, 128.7, 127.7, 118.4, 92.9, 47.8; IR (ATR)  
29 3146, 2365, 1582, 1521, 1413 cm<sup>-1</sup>; mp 181-183 °C; HRMS (ESI) calcd for C<sub>11</sub>H<sub>11</sub>N<sub>3</sub>OS<sub>2</sub>Na [M+Na]<sup>+</sup>  
30 288.0236, found 288.0239.

31

1 TT-10

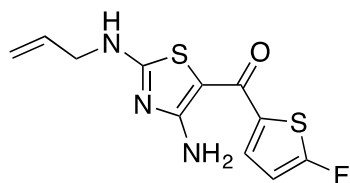

2  
3 *t*-BuOK (9.03 g, 80.5 mmol) was added to a solution of allyl isothiocyanate (3.58 mL, 36.8 mmol) and  
4 cyanamide (1.55 mg, 36.8 mmol) in DMF (100 mL) under an argon atmosphere at 0°C. After stirring  
5 at 0 °C to room temperature (rt) for 30 minutes, 2-bromo-1-(5-fluorothiophen-2-yl)ethan-1-one (7.82 g,  
6 35.1 mmol) was added the solution at 0 °C rinsed with DMF (5 mL), and stirred at rt. After 10 hours,  
7 the reaction mixture was diluted with cyclopentyl methyl ether (CPME), and quenched with H<sub>2</sub>O. The  
8 mixture was extracted with EtOAc, washed with brine, dried over MgSO<sub>4</sub>, and concentrated *in vacuo*.  
9 The residue was purified by silica gel column chromatography (n-hexane/EtOAc = 1/1 to 1/2) to give  
10 TT-10 as a yellow solid (2.15 g, 22 % yield).

11 HPLC (Pegasil Silica SP100, hexane/EtOAc= 50/50, flow rate 1.0 ml/min,  $\lambda$  = 254 nm)  $t_r$  (minor) =  
12 11.36 min,  $t_r$  (major) = 13.12 min, purity >99%; <sup>1</sup>H NMR (500 MHz, CDCl<sub>3</sub>)  $\delta$  7.29 (m, 1H), 6.52 (dd,  
13  $J$  = 4.3, 1.5 Hz, 1H), 5.94 (ddd,  $J$  = 17.1, 10.1, 5.5 Hz, 1H), 5.75 (brs, 1H), 5.37 (ddd,  $J$  = 17.1, 2.8, 1.8  
14 Hz, 1H), 5.31 (brd,  $J$  = 10.1, 2.8, 1.2 Hz, 1H), 4.00 (brs, 2H), 1.58 (brs, 2H); <sup>13</sup>C NMR (125 MHz,  
15 CDCl<sub>3</sub>)  $\delta$  174.4, 172.4, 169.8 (d,  $J_{C-F}$  = 295.2 Hz, 1C), 166.3 (d,  $J_{C-F}$  = 4.5 Hz, 1C), 135.8, 132.3, 126.1,  
16 126.1 166.3 (d,  $J_{C-F}$  = 4.5 Hz, 1C), 118.4, 108.9 166.3 (d,  $J_{C-F}$  = 11.8 Hz, 1C), 91.9, 47.9; IR (ATR)  
17 2906, 2359, 1541, 1408 cm<sup>-1</sup>; mp 154-158 °C; HRMS (ESI) calcd for C<sub>11</sub>H<sub>10</sub>FN<sub>3</sub>OS<sub>2</sub>Na [M+Na]<sup>+</sup>  
18 306.0142, found 306.0153. Anal. Calcd for C<sub>11</sub>H<sub>10</sub>FN<sub>3</sub>OS<sub>2</sub>: C, 46.63; H, 3.56; N, 14.83%; found C,  
19 46.63; H, 3.75; N, 15.02%

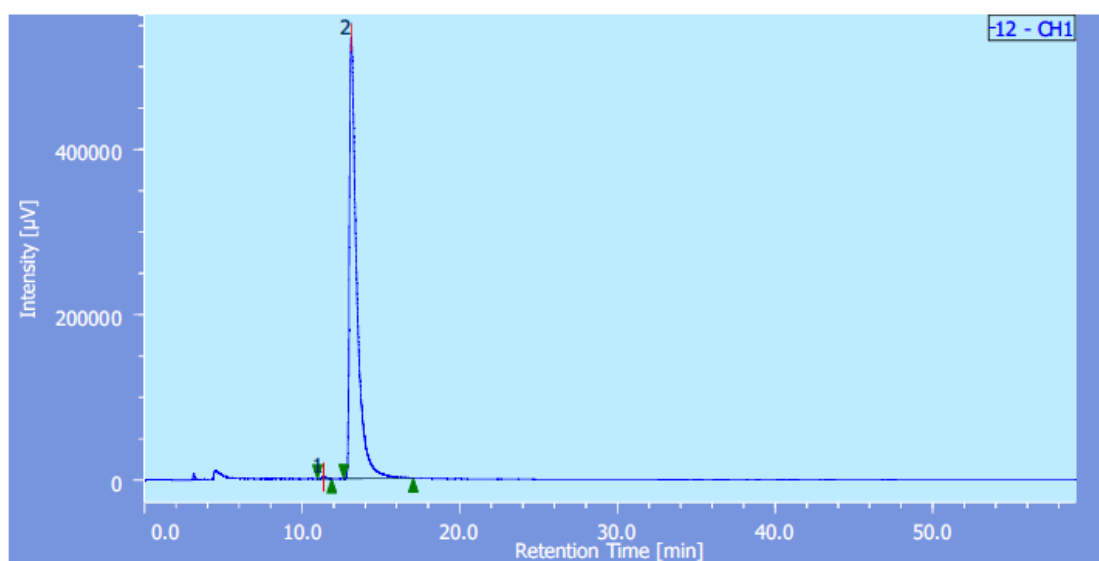

20  
21

1 TT-11

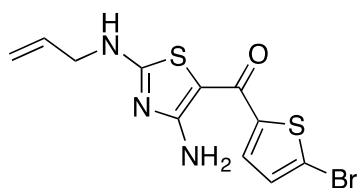

2

3 *t*-BuOK (302 mg, 2.69 mmol) was added to a solution of allyl isothiocyanate (125.3  $\mu$ L, 1.22 mmol)  
4 and cyanamide (52 mg, 1.22 mmol) in DMF (4 mL) under an argon atmosphere at 0°C. After stirring  
5 at 0 °C to room temperature (rt) for 30 minutes, 2-bromo-1-(2-nitrophenyl)ethan-1-one (332.2 mg, 1.17  
6 mmol) was added the solution at 0 °C rinsed with DMF (1 mL), and stirred at rt. After 10 hours, the  
7 reaction mixture was diluted with cyclopentyl methyl ether (CPME), and quenched with H<sub>2</sub>O. The  
8 mixture was extracted with EtOAc, washed with brine, dried over MgSO<sub>4</sub>, and concentrated *in vacuo*.  
9 The residue was purified by silica gel column chromatography (n-hexane/EtOAc = 1/1 to 1/2) to give  
10 TT-11 as a yellow solid (147 mg, 36% yield).

11 <sup>1</sup>H NMR (500 MHz, DMSO-d<sub>6</sub>)  $\delta$  9.02 (brs, 1H), 8.51 (brs, 1H), 8.10 (brs, 1H), 7.28 (s, 2H), 5.90 (ddd,  
12  $J$  = 17.1, 10.4, 5.2 Hz, 1H), 5.24 (brd,  $J$  = 17.1 Hz, 1H), 5.16 (brd,  $J$  = 10.4 Hz, 1H), 3.97 (brs, 2H); <sup>13</sup>C  
13 NMR (125 MHz, DMSO-d<sub>6</sub>)  $\delta$  170.5, 167.8, 148.9, 133.7(2C), 131.6, 128.1, 117.0, 116.4, 89.8, 46.1;  
14 IR (ATR) 3277, 2343, 1587, 1415 cm<sup>-1</sup>; mp 173-176 °C; HRMS (ESI) calcd for C<sub>11</sub>H<sub>10</sub>N<sub>3</sub>OS<sub>2</sub>BrNa  
15 [M+Na]<sup>+</sup> 365.9341, found 363.9345.

16

17 TT-12

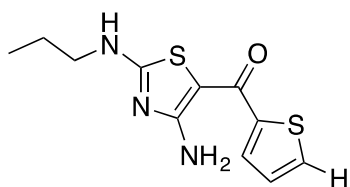

18

19 Pd/C (10% on carbon, 55% wetted with water, 15.0 mg) was added to a solution of TT-9 (30.0 mg, 113  
20  $\mu$ mol) in MeOH (2.26 mL). The mixture was stirred for 40 hours at rt under a hydrogen atmosphere.  
21 The reaction mixture was filtrated through Celite pad, concentrated *in vacuo*, and the reaction procedure  
22 was repeated two times to give TT-12 (28.7 mg, 95% yield) as a yellow solid.

23 <sup>1</sup>H NMR (500 MHz, CDCl<sub>3</sub>)  $\delta$  7.63 (dd,  $J$  = 4.0, 0.9 Hz, 1H), 7.51 (dd,  $J$  = 4.9, 1.2 Hz, 1H), 7.10 (dd,  
24  $J$  = 5.2, 4.0 Hz, 1H), 5.67 (brs, 1H), 3.29 (dt,  $J$  = 6.7, 6.7 Hz, 2H), 1.71 (tq,  $J$  = 7.3, 7.3 Hz, 2H), 1.02  
25 (t,  $J$  = 7.3 Hz, 3H) (2 protons are missing.); <sup>13</sup>C NMR (125 MHz, CDCl<sub>3</sub>)  $\delta$  175.0, 172.7, 166.5, 146.6,  
26 130.5, 128.7, 127.7, 92.8, 47.5, 22.6, 11.5; IR (ATR) 3353, 3153, 2961, 2364, 2338, 1607, 1585, 1417,  
27 1072 cm<sup>-1</sup>; mp 183-185 °C; HRMS calcd for C<sub>11</sub>H<sub>13</sub>N<sub>3</sub>OS<sub>2</sub>Na [M+Na]<sup>+</sup> 290.0392, found 290.0401.

28

1 TT-13

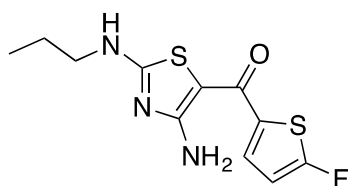

2

3 Pd/C (10% on carbon, 55% wetted with water, 3.2 mg) was added to a solution of TT-10 (2.9 mg, 10  
4  $\mu\text{mol}$ ) in EtOAc (0.3 mL). The mixture was stirred for 48 hours at rt under a hydrogen atmosphere. The  
5 reaction mixture was filtrated through Celite pad, concentrated *in vacuo*. The residue was purified by  
6 flash column chromatography (SiO<sub>2</sub>; *n*-hexane:EtOAc = 3:1 to 1:1) to give TT-13 (0.8 mg, 28% yield)  
7 as a yellow solid.

8 <sup>1</sup>H NMR (500 MHz, CDCl<sub>3</sub>)  $\delta$  7.27 (dd, *J* = 4.3, 3.4 Hz, 1H), 6.49 (dd, *J* = 4.3, 1.5 Hz, 1H), 5.78 (brs,

9 1H), 3.29 (dd, *J* = 7.3, 7.3 Hz, 2H), 1.72 (m, 2H), 1.02 (t, *J* = 7.6 Hz, 3H); <sup>13</sup>C NMR (125 MHz, CDCl<sub>3</sub>)

10  $\delta$  174.3, 172.6, 169.8 (d, *J*<sub>C-F</sub> = 295.2 Hz, 1C), 166.5, 135.7, 126.0 (d, *J*<sub>C-F</sub> = 4.5 Hz, 1C), 108.9 (d, *J*<sub>C-F</sub>

11 = 11.8 Hz, 1C), 91.9, 47.5, 22.6, 11.5; IR (ATR) 2363, 1590, 1558, 1456, 1073 cm<sup>-1</sup>; mp 154-158 °C;

12 HRMS (ESI) calcd for C<sub>11</sub>H<sub>12</sub>FN<sub>3</sub>OS<sub>2</sub>Na [M+Na]<sup>+</sup> 308.0298, found 308.0303.

13

14 TT-14

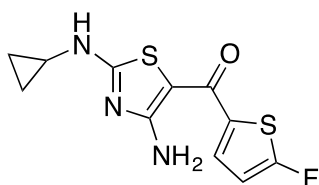

15

16 NaOMe (39.8 mg, 736.8  $\mu\text{mol}$ ), dissolved in MeOH (1.7 mL), was added to a solution of cyclopropyl  
17 isothiocyanate (40  $\mu\text{L}$ , 423.6  $\mu\text{mol}$ ) and cyanamide (18.0 mg, 428.2  $\mu\text{mol}$ ) in MeOH (1.0 mL) under an  
18 argon atmosphere at 0°C. After stirring at 0 °C to room temperature (rt) for 3 hours, 2-bromo-1-(5-  
19 fluorothiophen-2-yl)ethan-1-one (59.9 mg, 268.5  $\mu\text{mol}$ ) was added to the solution at rt, and stirred at  
20 50°C. After 1 hour, the reaction mixture was concentrated *in vacuo*. The residue was purified by silica  
21 gel column chromatography (*n*-hexane/EtOAc = 1/1 to 1/2) to give TT-14 as a yellow solid (35.8 mg,  
22 47% yield).

23 <sup>1</sup>H NMR (500 MHz, CDCl<sub>3</sub>)  $\delta$  7.34 (dd, *J* = 4.3, 3.4 Hz, 1H), 6.51 (dd, *J* = 4.3, 1.5 Hz, 1H), 6.07 (brs,  
24 1H), 2.67 (dddd, *J* = 6.7, 6.7, 3.7, 3.7 Hz, 1H), 0.90 (m, 2H), 0.77 (m, 2H) (2 protons are missing.); <sup>13</sup>C

25 NMR (125 MHz, CDCl<sub>3</sub>)  $\delta$  174.6, 174.3, 169.9 (d, *J*<sub>C-F</sub> = 295.2 Hz, 1C), 166.2, 135.9, 126.2 (d, *J*<sub>C-F</sub> =

26 4.5 Hz, 1C), 108.9 (d, *J*<sub>C-F</sub> = 11.8 Hz, 1C), 93.0, 26.3, 7.9 (2C); IR (ATR) 3466, 2875, 1587, 1436, 1198

27 cm<sup>-1</sup>; mp 223 °C; HRMS calcd for C<sub>11</sub>H<sub>11</sub>N<sub>3</sub>OS<sub>2</sub>F [M+H]<sup>+</sup> 306.0142, found 304.0155. Anal. Calcd for

28 C<sub>11</sub>H<sub>11</sub>N<sub>3</sub>OS<sub>2</sub>F + 1/3H<sub>2</sub>O: C, 45.66; H, 3.72; N, 14.52%; found C, 45.56; H, 3.64; N, 14.26%

1

2 TT-15

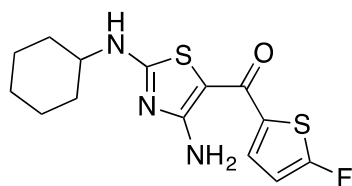

3

4 NaOMe (120.3 mg, 2.23 mmol), dissolved in MeOH (5.0 mL), was added to a solution of cyclohexyl  
 5 isothiocyanate (180  $\mu$ L, 1.27 mmol) and cyanamide (57.3 mg, 1.36 mmol) in MeOH (3.0 mL) under an  
 6 argon atmosphere at 0°C. After stirring at 0 °C to room temperature (rt) for 3 hours, 2-bromo-1-(5-  
 7 fluorothiophen-2-yl)ethan-1-one (205.5 mg, 921.2  $\mu$ mol) was added to the solution at rt, and stirred at  
 8 50°C. After 1 hour, the reaction mixture was concentrated *in vacuo*. The residue was purified by silica  
 9 gel column chromatography (n-hexane/EtOAc = 1/1) to give TT-15 as a yellow solid (25.1 mg, 8%  
 10 yield).

11  $^1\text{H}$  NMR (500 MHz,  $\text{CDCl}_3$ )  $\delta$  7.26 (m, 1H), 6.49 (dd,  $J$  = 4.3, 1.5 Hz, 1H), 5.54 (brs, 1H), 3.41 (brs,  
 12 1H), 2.10-2.07 (m, 2H), 1.81-1.77 (m, 2H), 1.69-1.64 (m, 1H), 1.46-1.37 (m, 2H), 1.34-1.21 (m, 3H)  
 13 (2 protons are missing.);  $^{13}\text{C}$  NMR (125 MHz,  $\text{CDCl}_3$ )  $\delta$  174.2, 170.9, 169.8 (d,  $J_{\text{C-F}}$  = 291.5 Hz, 1C),  
 14 166.5, 135.9, 126.0 (d,  $J_{\text{C-F}}$  = 4.5 Hz, 1C), 108.8 (d,  $J_{\text{C-F}}$  = 11.8 Hz, 1C), 91.6, 55.1, 33.0 (2C), 25.4,  
 15 24.7 (2C); IR (ATR) 3188, 2359, 1557, 1430, 1320, 1033  $\text{cm}^{-1}$ ; mp 192 °C; HRMS calcd for  
 16  $\text{C}_{14}\text{H}_{16}\text{N}_3\text{OS}_2\text{F}$   $[\text{M}+\text{H}]^+$  326.0792, found 326.0805. Anal. Calcd for  $\text{C}_{14}\text{H}_{16}\text{N}_3\text{OS}_2\text{F} + 1/8\text{H}_2\text{O}$ : C, 51.32;  
 17 H, 5.00; N, 12.82%; found C, 51.52; H, 5.01; N, 12.57%

18

19 TT-16

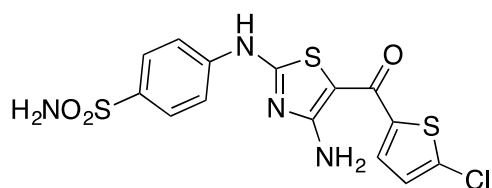

20

21 *t*-BuOK (302 mg, 2.69 mmol) was added to a solution of 4-isothiocyanatobenzenesulfonamide (261.4  
 22 mg, 1.22 mmol) and cyanamide (52 mg, 1.22 mmol) in THF (4.3 mL) under an argon atmosphere at  
 23 0°C. After stirring at 0 °C to room temperature (rt) for 30 minutes, 2-bromo-1-(5-chlorothiophen-2-  
 24 yl)ethan-1-one (279.3 mg, 1.17 mmol) was added the solution at 0 °C rinsed with THF, and stirred at rt.  
 25 After 10 hours, the mixture was filtrated through a short pad of silica gel and eluted with EtOAc and  
 26 the filtrate was concentrated *in vacuo*. The residue was purified by silica gel column chromatography  
 27 (EtOAc) to give TT-16 as a yellow solid (27 mg, 6% yield).

28  $^1\text{H}$  NMR (500 MHz,  $\text{DMSO-d}_6$ )  $\delta$  11.3 (brs, 1H), 8.36 (brs, 2H), 7.83 (brd,  $J$  = 8.9 Hz, 1H), 7.80 (brd,

1  $J = 8.9$  Hz, 1H), 7.44 (d,  $J = 4.3$  Hz, 1H), 7.29 (s, 2H), 7.23 (d,  $J = 4.3$  Hz, 1H);  $^{13}\text{C}$  NMR (125 MHz,  
2 DMSO- $d_6$ )  $\delta$  172.2, 166.6, 166.3, 145.7, 142.3, 138.3, 134.1, 128.5(2C), 127.1(2C), 118.5(2C), 90.4;  
3 IR (ATR) 3265, 2179, 1594, 1416  $\text{cm}^{-1}$ ; mp 214  $^{\circ}\text{C}$  (decomposed); HRMS (ESI) calcd for  
4  $\text{C}_{14}\text{H}_{12}\text{N}_4\text{O}_3\text{S}_3\text{Cl}$   $[\text{M}+\text{H}]^+$  414.9755, found 414.9770; Anal. Calcd for  $\text{C}_{14}\text{H}_{11}\text{N}_4\text{O}_2\text{S}_3\text{Cl} + 1/4\text{EtOH}$ : C,  
5 40.84; H, 2.95; N, 13.14%, found C, 41.04; H, 2.69; N, 12.90%.

6

7 TT-19

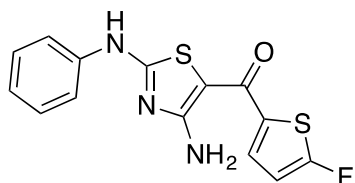

9  $t$ -BuOK (171.7 mg, 1.53 mmol) was added to a solution of phenyl isothiocyanate (107.2 mg, 700  $\mu\text{mol}$ )  
10 and cyanamide (29.4 mg, 700  $\mu\text{mol}$ ) in DMF (2.0 mL) under an argon atmosphere at  $0^{\circ}\text{C}$ . After stirring  
11 at  $0^{\circ}\text{C}$  to room temperature (rt) for 30 minutes, 2-bromo-1-(5-fluorothiophen-2-yl)ethan-1-one (148.7  
12 mg, 667  $\mu\text{mol}$ ) was added the solution at  $0^{\circ}\text{C}$  rinsed with DMF (0.5 mL), and stirred at rt. After 20  
13 hours, the mixture was filtrated through a short pad of silica gel and eluted with EtOAc and the filtrate  
14 was concentrated *in vacuo*. The residue was purified by silica gel column chromatography (n-  
15 hexane/EtOAc = 3/1) to give TT-19 as a yellow solid (8.1 mg, 4% yield).

16  $^1\text{H}$  NMR (500 MHz, DMSO- $d_6$ )  $\delta$  10.97 (brs, 1H), 8.31 (brs, 2H), 7.66 (d,  $J = 7.6$  Hz, 2H), 7.39 (dd,  $J$   
17 = 7.3, 7.3 Hz, 2H), 7.29 (dd,  $J = 4.3, 3.7$  Hz, 1H), 7.12 (t,  $J = 7.3$  Hz, 1H), 6.84 (dd,  $J = 4.3, 1.8$  Hz,  
18 1H);  $^{13}\text{C}$  NMR (125 MHz, DMSO- $d_6$ )  $\delta$  172.3, 169.2, 166.9, 166.8, 139.4, 136.3, 129.2 (2C), 125.9 (d,  
19  $J = 4.5$  Hz), 123.7, 119.2 (2C), 110.1 (d,  $J = 11.8$  Hz), 89.6;  $^{19}\text{F}$ -NMR (471 MHz, DMSO- $d_6$ )  $\delta$  -124.6  
20 (s); IR (ATR) 3273, 3084, 2917, 2849, 1702, 1597, 1556, 1422, 1200  $\text{cm}^{-1}$ ; HRMS calcd for  
21  $\text{C}_{14}\text{H}_{10}\text{FN}_3\text{OS}_2\text{Na}$   $[\text{M}+\text{Na}]^+$  342.0142, found 342.0132.

22

23 TT-20

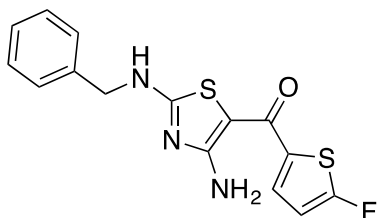

25  $t$ -BuOK (190.0 mg, 1.69 mmol) was added to a solution of benzyl isothiocyanate (110  $\mu\text{L}$ , 833.1  $\mu\text{mol}$ )  
26 and cyanamide (34.3 mg, 815.9  $\mu\text{mol}$ ) in THF (2.0 mL) under an argon atmosphere at  $0^{\circ}\text{C}$ . After stirring  
27 at  $0^{\circ}\text{C}$  to room temperature (rt) for 30 minutes, 2-bromo-1-(5-fluorothiophen-2-yl)ethan-1-one (166.5



1 mg, 746.4  $\mu\text{mol}$ ) was added the solution at 0 °C rinsed with THF (1.0 mL), and stirred at rt. After 21  
2 hours, the reaction mixture was diluted with diethyl ether, and quenched with H<sub>2</sub>O. The mixture was  
3 extracted with EtOAc, washed with brine, dried over MgSO<sub>4</sub>, and concentrated *in vacuo*. The residue  
4 was purified by silica gel column chromatography (n-hexane/EtOAc = 3/1 to 1/1) to give TT-20 as a  
5 yellow solid (1.5 mg, 1% yield).  
6 <sup>1</sup>H-NMR (500 MHz, CDCl<sub>3</sub>)  $\delta$  7.38 (m, 6H), 7.25 (dd, J = 4.3, 3.4 Hz, 1H), 6.48 (dd, J = 4.3, 1.5 Hz,  
7 1H), 5.88 (brs, 1H), 4.54 (brs, 2H); <sup>13</sup>C-NMR (125 MHz, CDCl<sub>3</sub>)  $\delta$  174.5, 172.2, 169.9 (d, J<sub>C-F</sub> = 295.2  
8 Hz, 1C), 166.2, 136.2, 135.8, 129.2 (2C), 128.5, 127.8 (2C), 126.1 (d, J<sub>C-F</sub> = 4.5 Hz, 1C), 108.9 (d, J<sub>C-F</sub>  
9 = 11.8 Hz, 1C), 91.8, 49.6; IR (ATR) 3489, 2912, 1584, 1406, 1199 cm<sup>-1</sup>; mp 193 °C; HRMS calcd for  
10 C<sub>15</sub>H<sub>13</sub>N<sub>3</sub>OS<sub>2</sub>F [M+H]<sup>+</sup> 334.0479, found 334.0495.

11

12 TT-21

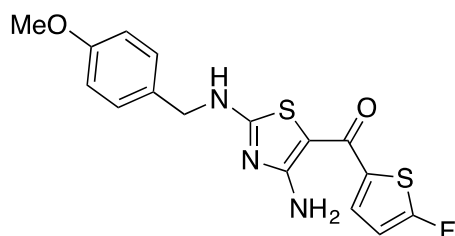

13

14

15 NaOMe (39.2 mg, 725.7  $\mu\text{mol}$ ), dissolved in MeOH (1.7 mL), was added to a solution of 4-  
16 methoxybenzyl isothiocyanate (65  $\mu\text{L}$ , 427.9  $\mu\text{mol}$ ) and cyanamide (17.9 mg, 425.6  $\mu\text{mol}$ ) in MeOH  
17 (1.0 mL) under an argon atmosphere at 0°C. After stirring at 0 °C to room temperature (rt) for 3 hours,  
18 2-bromo-1-(5-fluorothiophen-2-yl)ethan-1-one (67.4 mg, 302.2  $\mu\text{mol}$ ) was added to the solution at rt,  
19 and stirred at rt. After 15 hours, the reaction mixture was concentrated *in vacuo*. The residue was  
20 purified by silica gel column chromatography (n-hexane/EtOAc = 1/1) to give TT-21 as a yellow solid  
21 (27.0 mg, 25% yield).

22 <sup>1</sup>H NMR (500 MHz, CDCl<sub>3</sub>)  $\delta$  7.29-7.23 (m, 3H), 6.31 (d, J = 8.5 Hz, 1H), 6.48 (dd, J = 4.3, 1.5 Hz,  
23 1H), 5.87 (brs, 1H), 4.45 (brd, J = 4.6 Hz, 1H), 3.82 (s, 3H), 3.53 (brs, 1H) (1 proton is missing.); <sup>13</sup>C  
24 NMR (125 MHz, CDCl<sub>3</sub>)  $\delta$  174.4, 172.0, 169.8 (d, J<sub>C-F</sub> = 295.2 Hz, 1C), 166.3, 159.8, 135.8, 129.3 (2C),  
25 128.0, 126.1 (d, J<sub>C-F</sub> = 4.5 Hz, 1C), 114.6 (2C), 108.9 (d, J<sub>C-F</sub> = 11.8 Hz, 1C), 91.8, 55.5, 49.2; IR (ATR)  
26 2361, 1585, 1408, 1246, 1177 cm<sup>-1</sup>; mp 174 °C; HRMS calcd for C<sub>16</sub>H<sub>15</sub>N<sub>3</sub>O<sub>2</sub>S<sub>2</sub>F [M+H]<sup>+</sup> 364.0584,  
27 found 364.0596. Anal. Calcd for C<sub>16</sub>H<sub>15</sub>N<sub>3</sub>O<sub>2</sub>S<sub>2</sub>F + 1/2H<sub>2</sub>O: C, 51.60; H, 4.06; N, 11.28%; found C,  
28 51.77; H, 4.18; N, 11.36%

29

30 TT-22

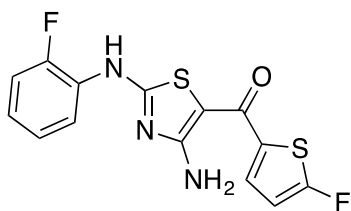

1  
2 NaOMe (38.0 mg, 703.4  $\mu\text{mol}$ ), dissolved in MeOH (1.7 mL), was added to a solution of *o*-fluorophenyl  
3 isothiocyanate (50  $\mu\text{L}$ , 408.0  $\mu\text{mol}$ ) and cyanamide (17.2 mg, 409.1  $\mu\text{mol}$ ) in MeOH (1.0 mL) under an  
4 argon atmosphere at 0°C. After stirring at 0 °C to room temperature (rt) for 3 hours, 2-bromo-1-(5-  
5 fluorothiophen-2-yl)ethan-1-one (68.2 mg, 305.7  $\mu\text{mol}$ ) was added to the solution at rt, and stirred at  
6 50°C. After 2 hours, the reaction mixture was concentrated *in vacuo*. The residue was purified by silica  
7 gel column chromatography (n-hexane/EtOAc = 2/1) to give TT-22 as a yellow solid (34.7 mg, 34%  
8 yield).

9  $^1\text{H}$  NMR (500 MHz,  $\text{CDCl}_3$ )  $\delta$  7.98 (dd,  $J = 7.9, 7.9$  Hz, 1H), 7.56 (brs, 1H), 7.29 (dd,  $J = 4.3, 3.7$  Hz,  
10 1H), 7.25-7.12 (m, 3H), 6.50 (dd,  $J = 4.3, 1.2$  Hz, 1H) (3 protons are missing);  $^{13}\text{C}$  NMR (125 MHz,  
11  $\text{CDCl}_3$ )  $\delta$  175.3, 170.2 (d,  $J_{\text{C-F}} = 297.9$  Hz, 1C), 167.6, 165.1, 153.1 (d,  $J_{\text{C-F}} = 245.2$  Hz, 1C), 135.4,  
12 126.9 (d,  $J_{\text{C-F}} = 10.9$  Hz, 1C), 126.7 (d,  $J_{\text{C-F}} = 4.5$  Hz, 1C), 125.5 (d,  $J_{\text{C-F}} = 7.3$  Hz, 1C), 125.1 (d,  $J_{\text{C-F}} =$   
13 3.6 Hz, 1C), 121.1, 115.9 (d,  $J_{\text{C-F}} = 19.1$  Hz, 1C), 109.1 (d,  $J_{\text{C-F}} = 11.8$  Hz, 1C), 92.3; IR (ATR) 3425,  
14 3304, 2956, 1625, 1414, 1258  $\text{cm}^{-1}$ ; mp 178 °C; HRMS calcd for  $\text{C}_{14}\text{H}_{10}\text{N}_3\text{OS}_2\text{F}_2$   $[\text{M}+\text{H}]^+$  338.0228,  
15 found 338.0237; Anal. Calcd for  $\text{C}_{14}\text{H}_9\text{N}_3\text{O}_2\text{S}_2\text{F}_2$ : C, 49.84; H, 2.69; N, 12.46%; found C, 49.80; H,  
16 2.90; N, 12.49%.

17

18 TT-23

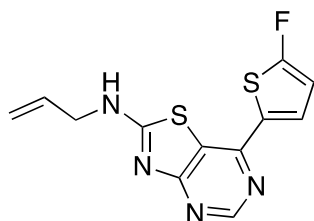

19  
20 Ammonium acetate (6.4 mg, 70.0  $\mu\text{mol}$ ) and ethyl orthoformate (13.4 mg, 70.0  $\mu\text{mol}$ ) were added to a  
21 solution of TT-10 (4.0 mg, 14.0  $\mu\text{mol}$ ) in toluene (1 mL). After stirring under reflux for 17 hours before  
22 concentration under reduced pressure. The residue was purified by flash chromatography ( $\text{SiO}_2$ ; *n*-  
23 hexane:EtOAc = 1:1) to give TT-23 (1.7 mg, 41% yield) as a yellow solid.

24  $^1\text{H}$  NMR (500 MHz,  $\text{CDCl}_3$ )  $\delta$  8.87 (s, 1H), 7.30 (dd,  $J = 4.0, 3.7$  Hz, 1H), 6.62 (dd,  $J = 4.3, 1.8$  Hz,  
25 1H), 6.12 (brs, 1H), 5.99 (ddd,  $J = 17.1, 10.1, 5.8$  Hz, 1H), 5.41 (brd,  $J = 17.1$  Hz, 1H), 5.32 (brd,  $J =$   
26 10.1 Hz, 1H), 4.22 (brd,  $J = 5.2$  Hz, 1H);  $^{13}\text{C}$  NMR (125 MHz,  $\text{DMSO-d}_6$ )  $\delta$  170.6, 167.6 (d,  $J_{\text{C-F}} =$   
27 291.5 Hz, 1C), 155.3, 148.6, 133.7, 130.77, 130.75, 126.3 (d,  $J_{\text{C-F}} = 4.5$  Hz, 1C), 116.77, 116.75, 110.9

1 (d,  $J_{C-F} = 11.8$  Hz, 1C), 46.4; IR (ATR) 2871, 1618, 1479, 1383, 767  $\text{cm}^{-1}$ ; mp 236  $^{\circ}\text{C}$ ; HRMS calcd for  
2  $\text{C}_{12}\text{H}_{10}\text{N}_4\text{S}_2\text{F}$   $[\text{M}+\text{H}]^+$  293.0325, found 293.0334.

3

4 TT-24

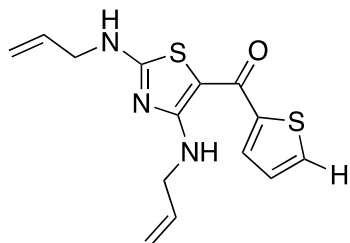

5

6 *t*-BuOK (11.2 mg, 100  $\mu\text{mol}$ ) was added to a solution of TT-9 (26.5 mg, 100  $\mu\text{mol}$ ) in THF/DMF (3/1,  
7 400  $\mu\text{L}$ ) at rt under an argon atmosphere. After stirring at rt for 1 hour, allyl bromide (6.8  $\mu\text{L}$ , 80.0  $\mu\text{mol}$ )  
8 was added to the mixture, and stirred at rt for 2 hours. The reaction mixture was quenched with  $\text{H}_2\text{O}$ ,  
9 extracted with EtOAc, washed with brine, dried over  $\text{Na}_2\text{SO}_4$ , and concentrated *in vacuo*. The residue  
10 was purified by flash column chromatography ( $\text{SiO}_2$ ; *n*-hexane:EtOAc = 5:1 to 4:1) to give TT-24 (14.3  
11 mg, 47% yield) as a yellow solid.

12  $^1\text{H}$  NMR (500 MHz,  $\text{CDCl}_3$ )  $\delta$  7.63 (dd,  $J = 3.7, 0.9$  Hz, 1H), 7.49 (dd,  $J = 4.9, 0.9$  Hz, 1H), 7.09 (dd,  
13  $J = 4.9, 3.7$  Hz, 1H), 5.82 (ddt,  $J = 17.1, 10.1, 5.8$  Hz, 2H), 5.27 (d,  $J = 11.3$  Hz, 2H), 5.24 (d,  $J = 17.1$   
14 Hz, 2H), 4.09 (brs, 4H);  $^{13}\text{C}$  NMR (125 MHz,  $\text{CDCl}_3$ )  $\delta$  174.8, 172.0, 166.7, 146.9, 131.3 (2C), 130.4,  
15 128.6, 127.7, 118.9 (2C), 93.4, 52.7 (2C); IR (ATR) 3330, 3262, 3157, 2360, 2341, 1605, 1538, 1415  
16  $\text{cm}^{-1}$ ; mp 99-100  $^{\circ}\text{C}$ ; HRMS calcd for  $\text{C}_{14}\text{H}_{15}\text{N}_3\text{OS}_2\text{Na}$   $[\text{M}+\text{Na}]^+$  328.0549, found 328.0552; Anal.  
17 Calcd for  $\text{C}_{14}\text{H}_{15}\text{N}_3\text{OS}_2$ : C, 55.06; H, 4.95; N, 13.76%, found C, 55.06; H, 5.06; N, 13.54%.

18

19 TT-25

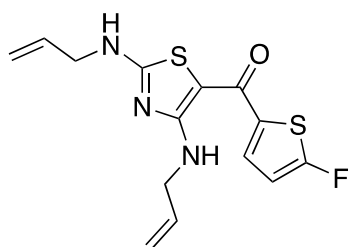

20

21 *t*-BuOK (11.7 mg, 104.3  $\mu\text{mol}$ ) was added to a solution of TT-10 (30.3 mg, 106.9  $\mu\text{mol}$ ) in THF/DMF  
22 (3/1, 440  $\mu\text{L}$ ) at rt under an argon atmosphere. After stirring at rt for 5 minutes, allyl bromide (10.7 mg,  
23 88.4  $\mu\text{mol}$ ) was added to the mixture, and stirred at rt for 3 hours. The reaction mixture was quenched  
24 with sat.  $\text{NH}_4\text{Cl}$  aq., extracted with EtOAc, washed with brine, dried over  $\text{MgSO}_4$ , and concentrated *in*  
25 *vacuo*. The residue was purified by flash column chromatography ( $\text{SiO}_2$ ; *n*-hexane:EtOAc = 4:1 to 2:1)  
26 to give TT-25 (13.2 mg, 46% yield) as a yellow solid.

1 <sup>1</sup>H NMR (500 MHz, CDCl<sub>3</sub>) δ 7.26 (dd, *J* = 4.3, 3.4 Hz, 1H), 6.48 (dd, *J* = 4.3, 1.5 Hz, 1H), 5.82 (ddd,  
2 *J* = 17.1, 10.4, 5.5 Hz, 2H), 5.29-5.23 (m, 4H), 4.10 (brs, 4H) (1 proton is missing.); <sup>13</sup>C NMR (125  
3 MHz, CDCl<sub>3</sub>) δ 174.0, 172.0, 169.7 (d, *J*<sub>C-F</sub> = 295.2 Hz, 1C), 166.8, 136.1, 131.2 (2C), 125.9 (d, *J*<sub>C-F</sub> =  
4 4.5 Hz, 1C), 119.0 (2C), 108.8 (d, *J*<sub>C-F</sub> = 11.8 Hz, 1C), 92.5, 52.6 (2C); IR (ATR) 3357, 3253, 3193,  
5 2360, 1609, 1519, 1411, 1201, 924 cm<sup>-1</sup>; mp 105 °C; HRMS calcd for C<sub>14</sub>H<sub>15</sub>N<sub>4</sub>OS<sub>2</sub>F [M+H]<sup>+</sup> 324.0635,  
6 found 324.0637. Anal. Calcd for C<sub>14</sub>H<sub>15</sub>N<sub>4</sub>OS<sub>2</sub>F + 1/4H<sub>2</sub>O: C, 51.28; H, 4.46; N, 12.81%; found C,  
7 51.42; H, 4.34; N, 12.54%

8

9 TT-26

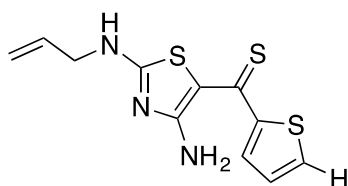

11

12 Lawesson's Reagent (22.0 mg, 54.5 μmol) was added to a solution of TT-9 (21.9 mg, 82.5 μmol) in  
13 toluene (330 μL) at rt under an argon atmosphere. The mixture was stirred at 85 °C for 16 hours, and  
14 then concentrated *in vacuo*. The residue was purified by flash column chromatography (SiO<sub>2</sub>; *n*-  
hexane:EtOAc = 3:1 to 0:1) two times to give TT-26 (4.1 mg, 18% yield) as a yellow solid.

15 <sup>1</sup>H NMR (500 MHz, DMSO) δ 11.4 (brs, 1H), 9.34 (brs, 1H), 7.65 (dd, *J* = 5.2, 0.9 Hz, 1H), 7.32(d, *J*  
16 = 3.4 Hz, 1H), 7.07 (dd, *J* = 5.2, 3.7 Hz, 1H), 6.30 (brs, 1H), 5.91 (m, 1H), 5.23 (brd, *J* = 17.1 Hz, 1H),  
17 5.18 (d, *J* = 10.1 Hz, 1H), 3.82 (brs, 2H); <sup>13</sup>C NMR (125 MHz, DMSO) δ 175.4, 170.3, 169.5, 154.2,  
18 133.6, 130.4, 127.1, 124.5, 116.5, 110.3, 45.6; IR (ATR) 3200, 3051, 2920, 2359, 2334, 1611, 1572,  
19 1421 cm<sup>-1</sup>; mp 156-158 °C; HRMS calcd for C<sub>11</sub>H<sub>11</sub>N<sub>3</sub>S<sub>3</sub>Na [M+Na]<sup>+</sup> 304.0007, found 304.0006; Anal.  
20 Calcd for C<sub>11</sub>H<sub>11</sub>N<sub>3</sub>S<sub>3</sub> + 1/3EtOH: C, 47.22; H, 4.42; N, 14.16%; found C, 47.03; H, 4.20; N, 14.15%.

21

22

23 Data of TAZ-12 (13), TT-2 (13), TT-3 (13), TT-4 (13), TT-7 (13), TT-8 (13), TT-17 (14), and TT-18  
24 (15) have been already reported.

25

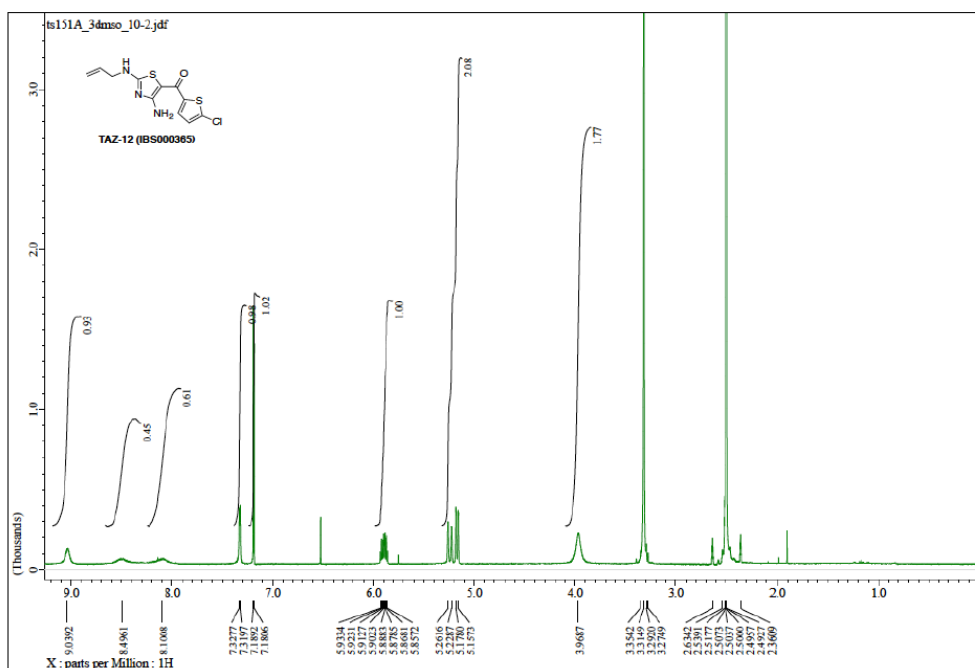

1

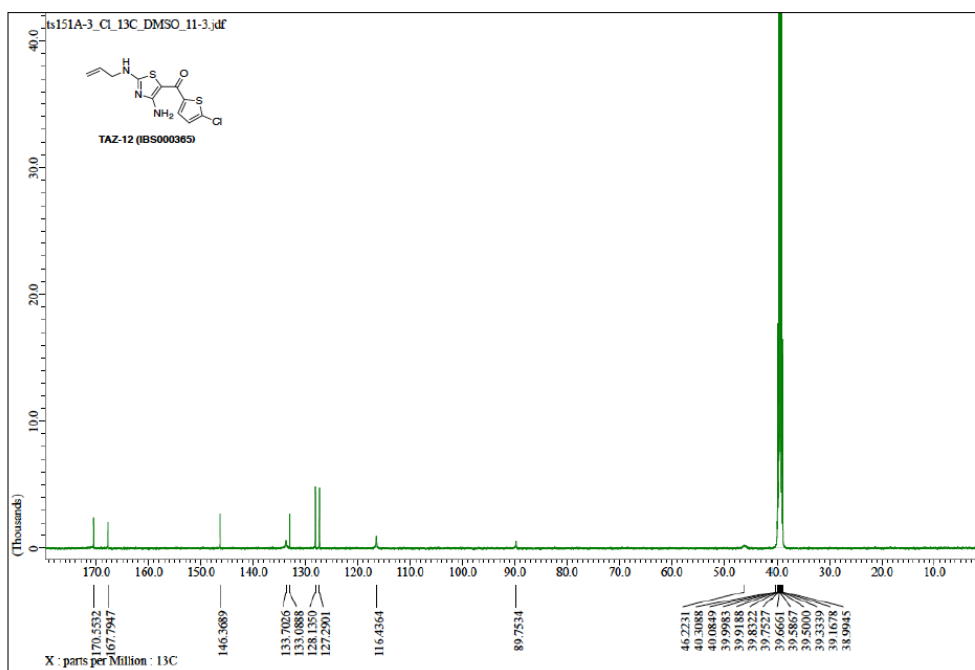

2

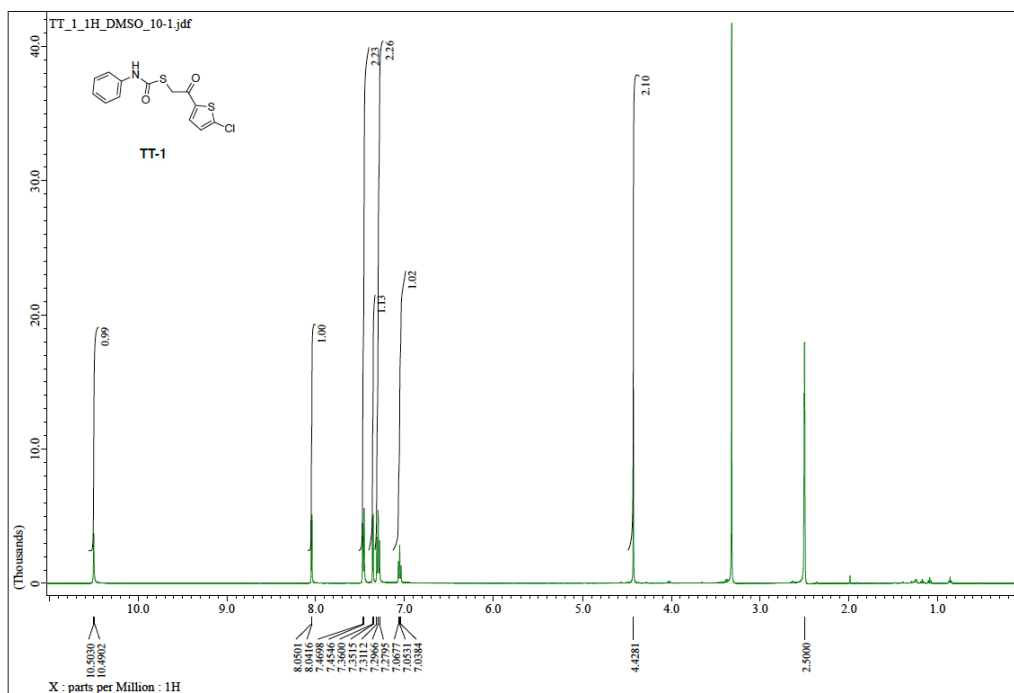

1

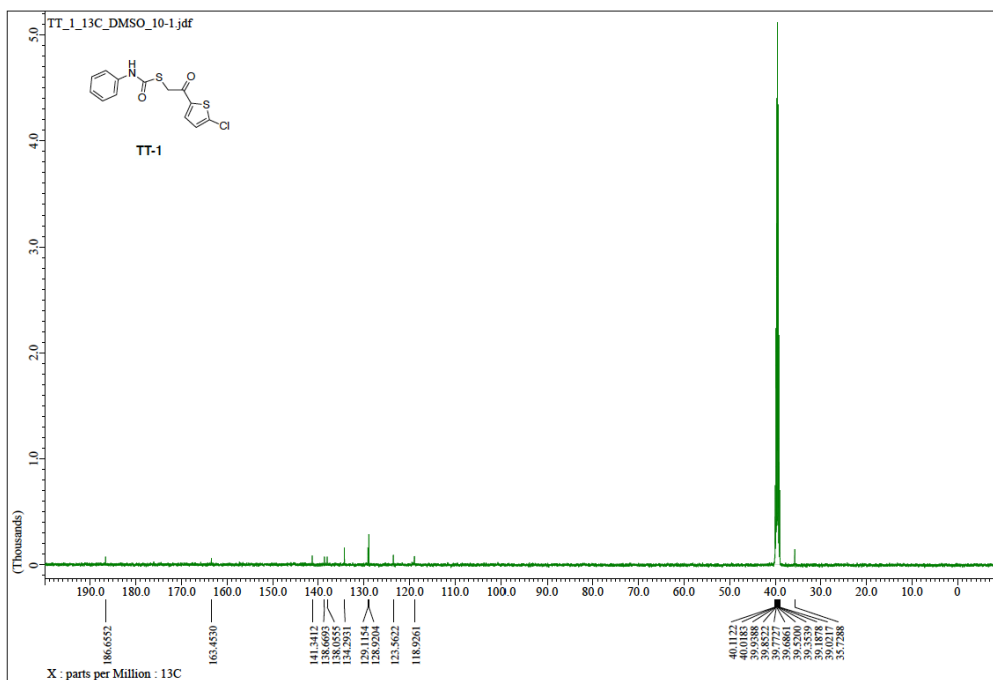

2

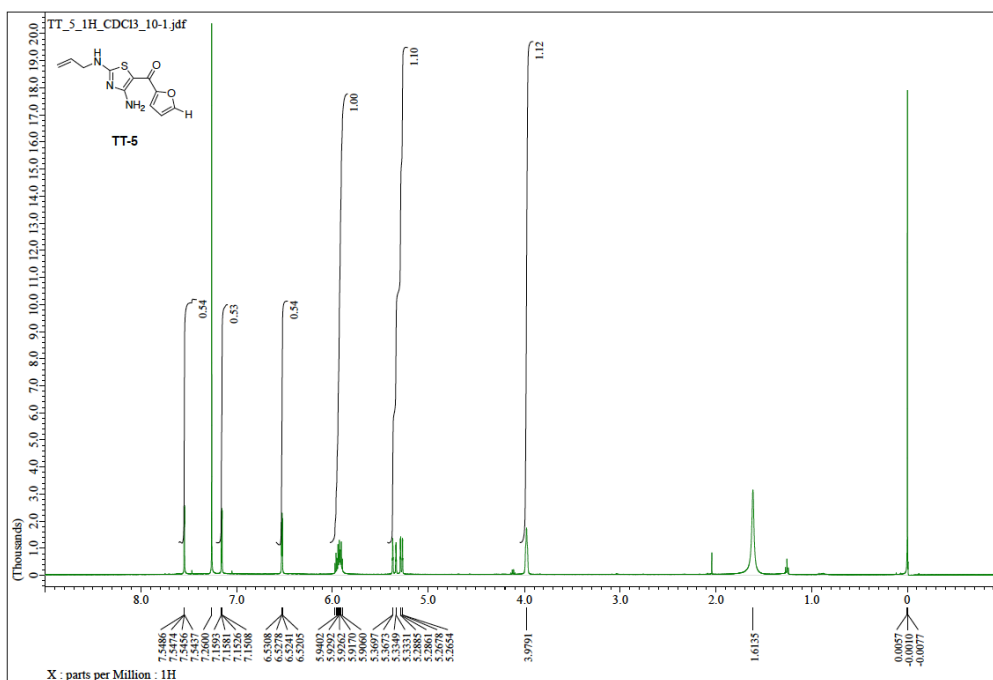

1

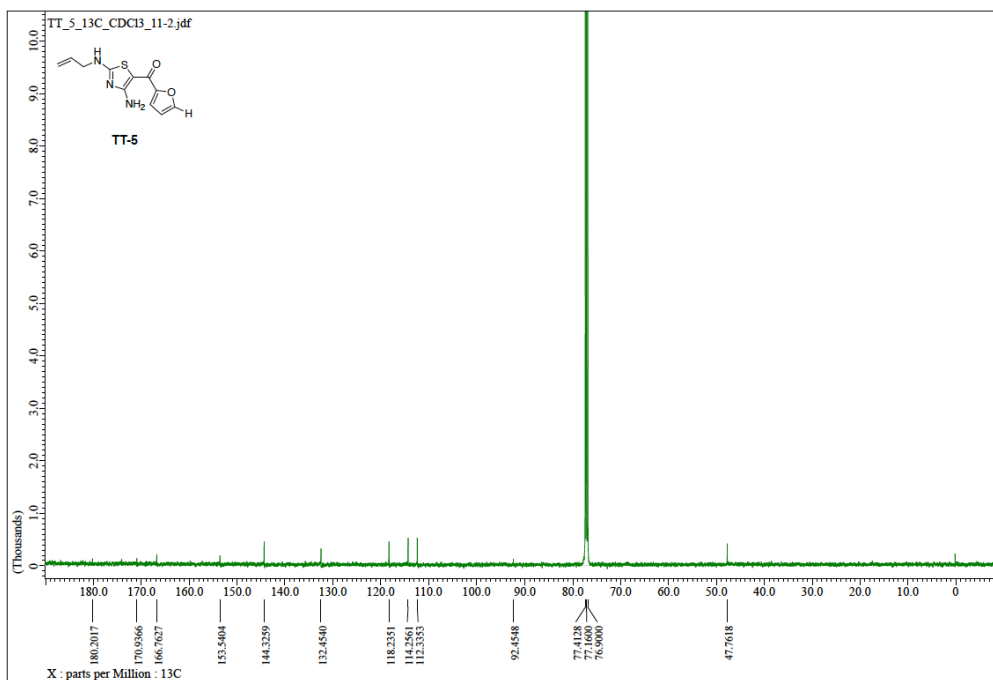

2

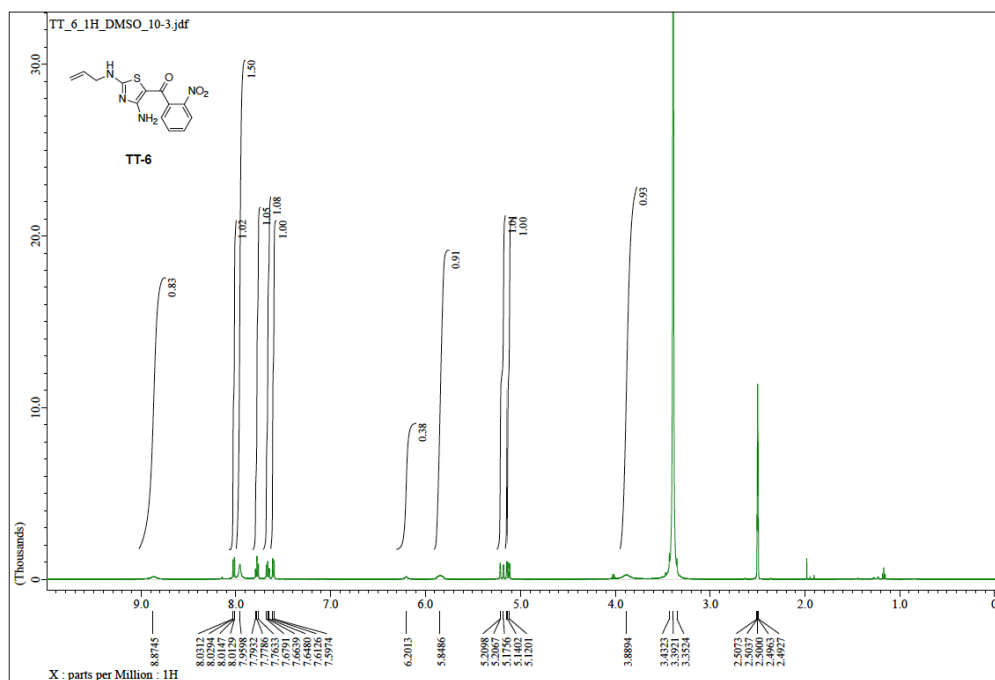

1

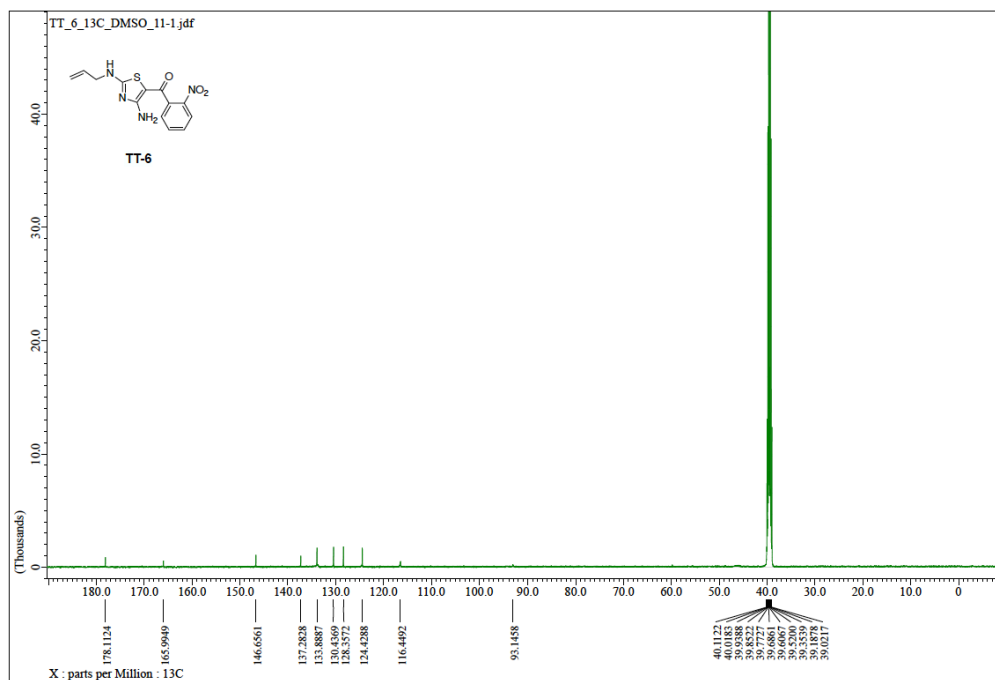

2



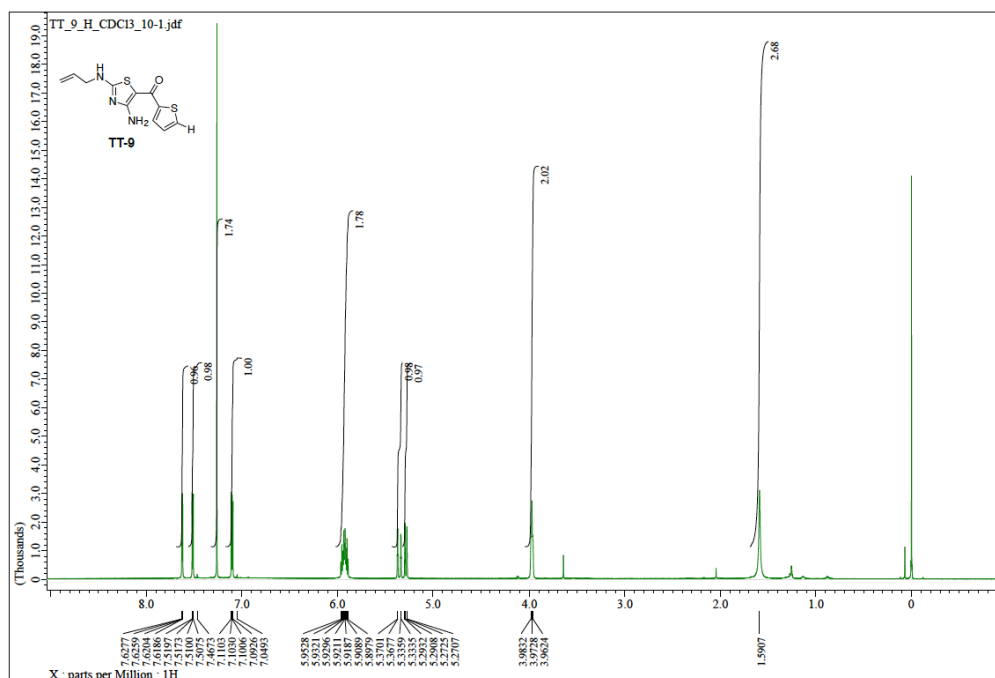

1

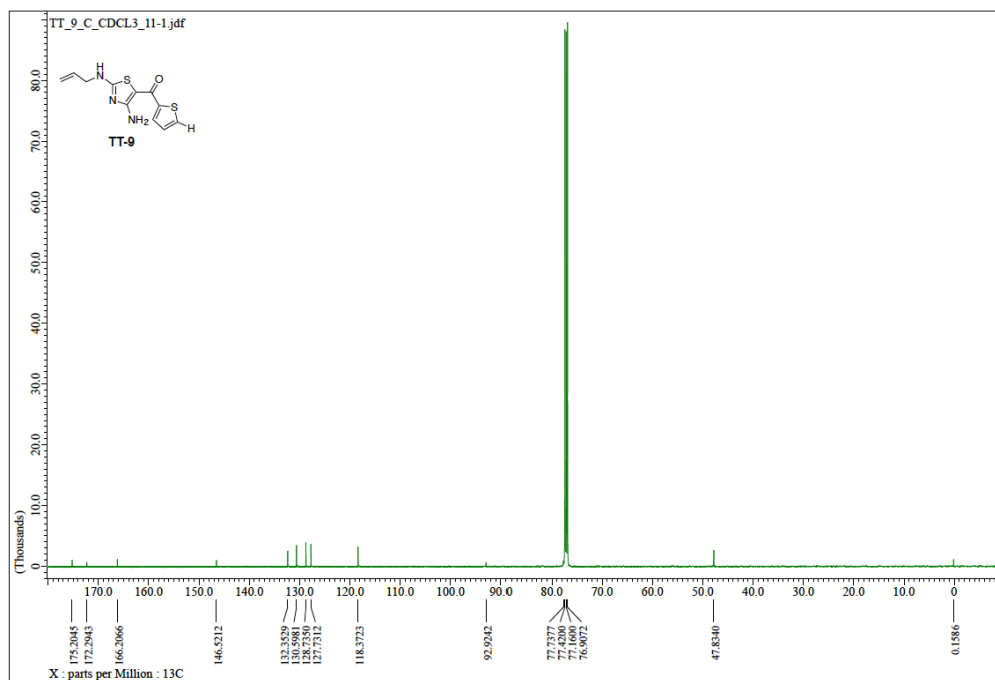

2

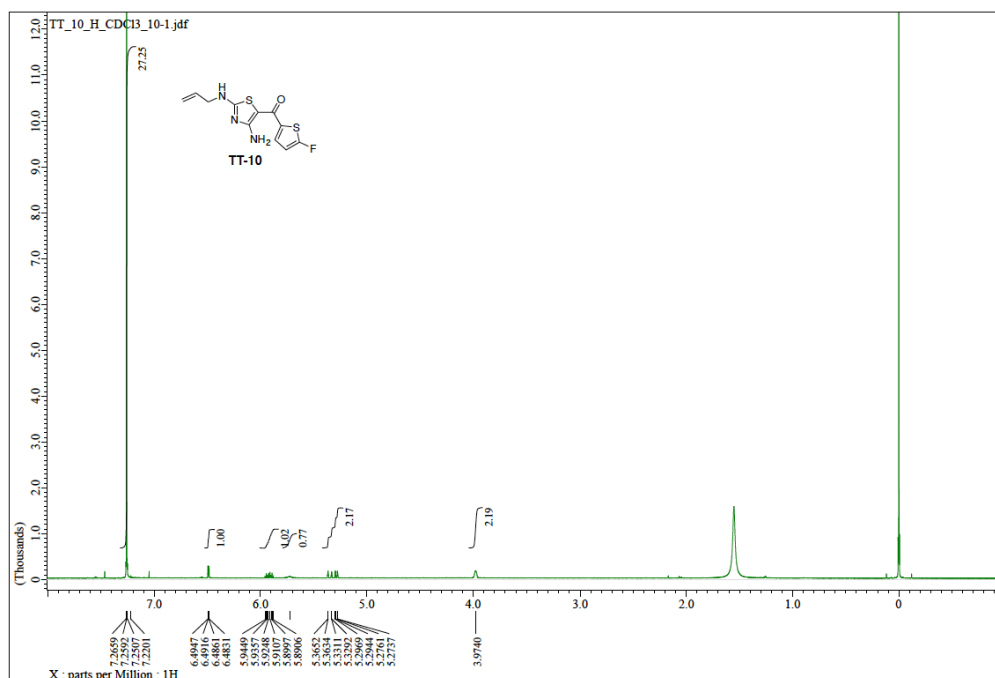

1

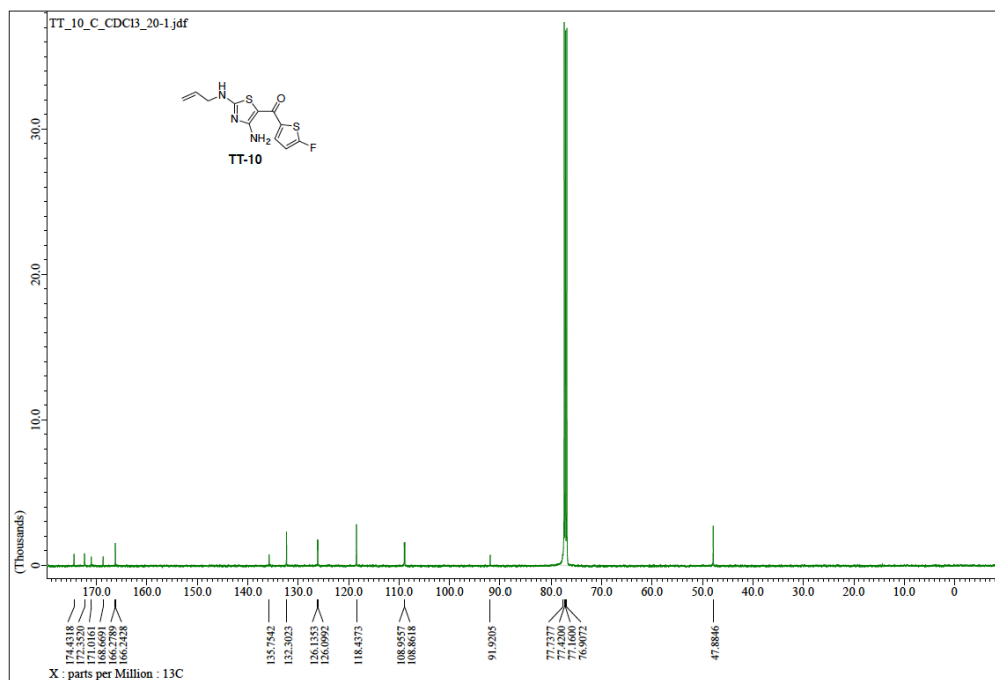

2

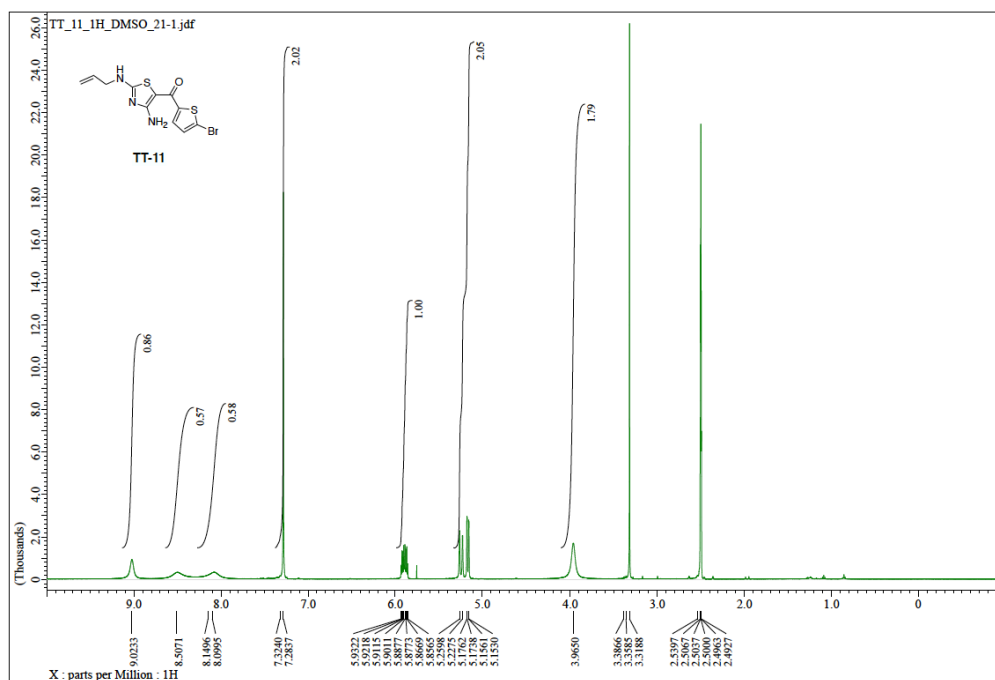

1

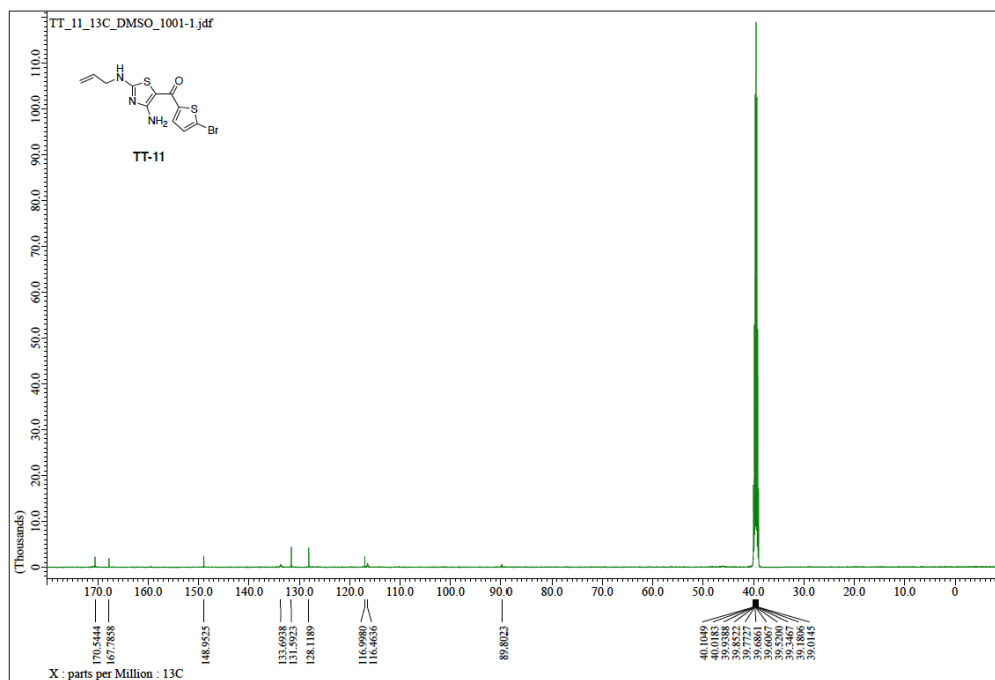

2

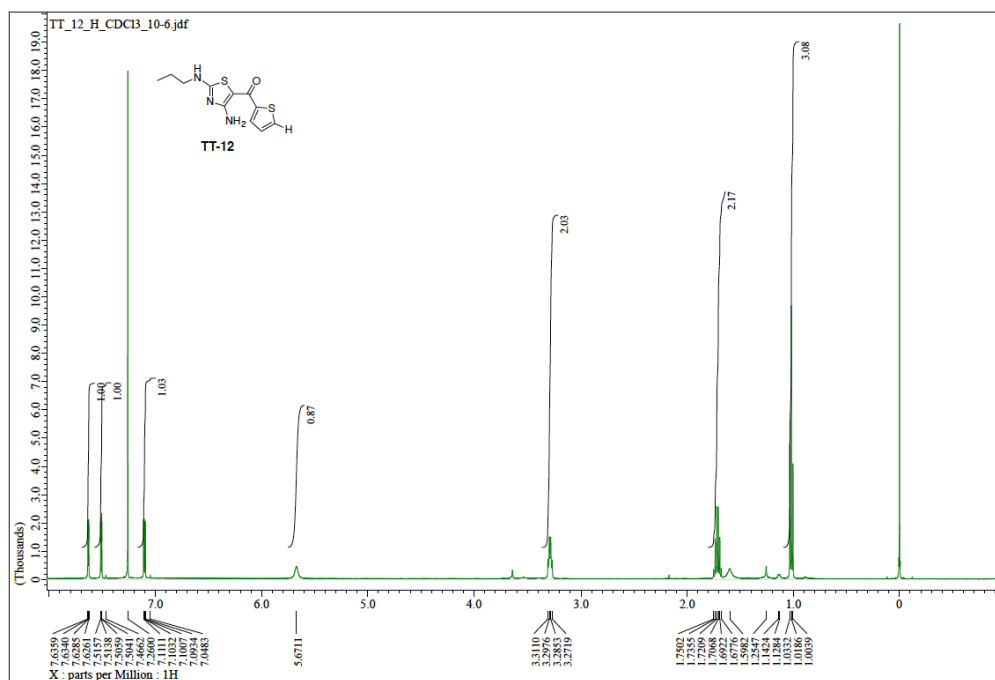

1

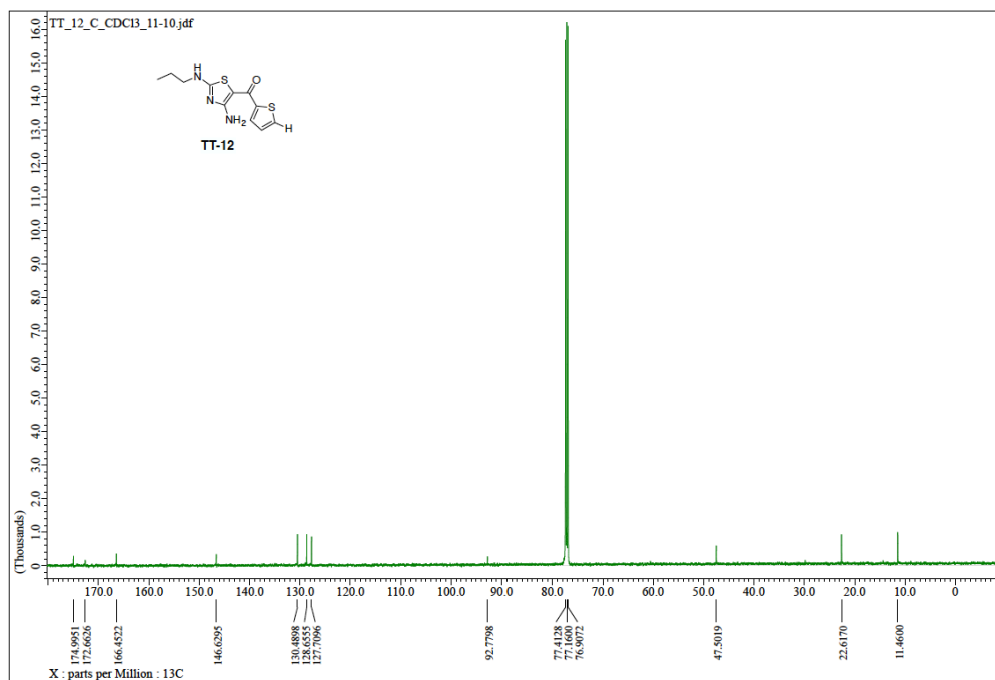

2

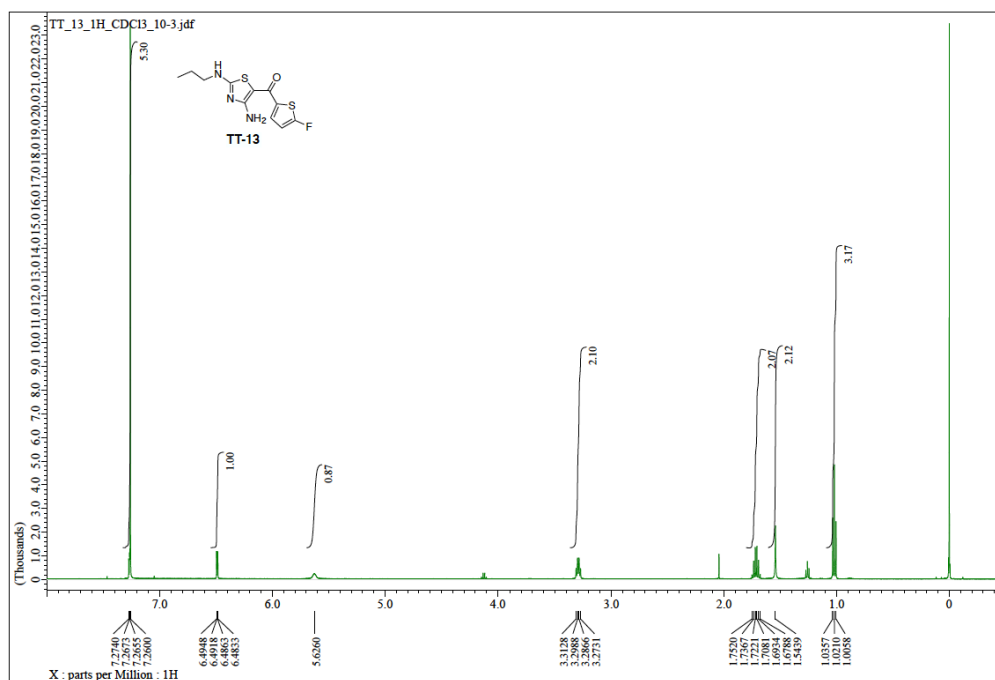

1

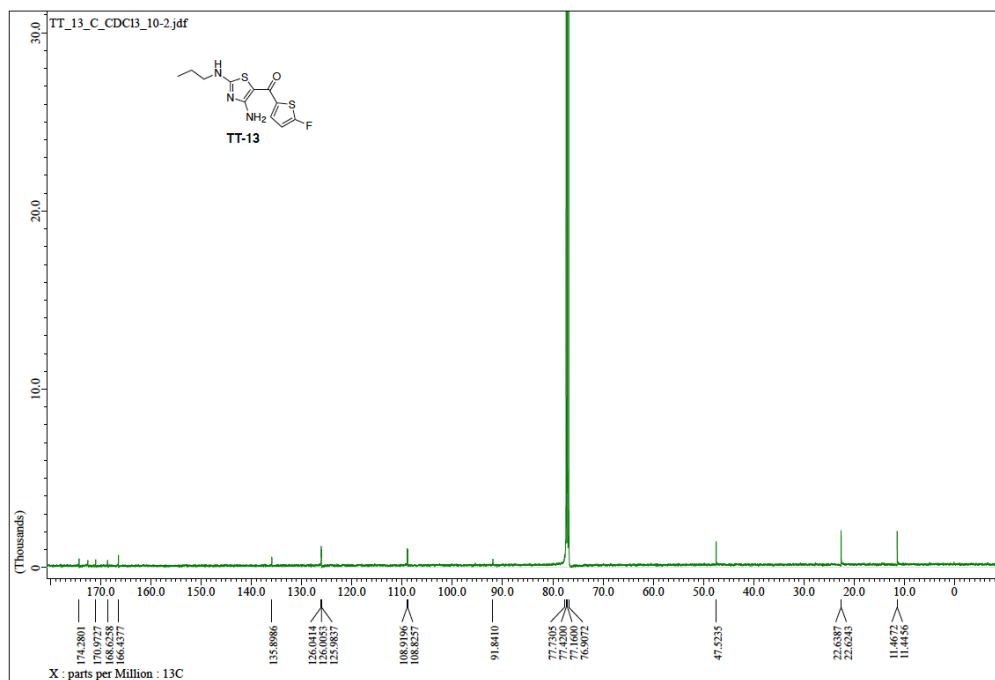

2

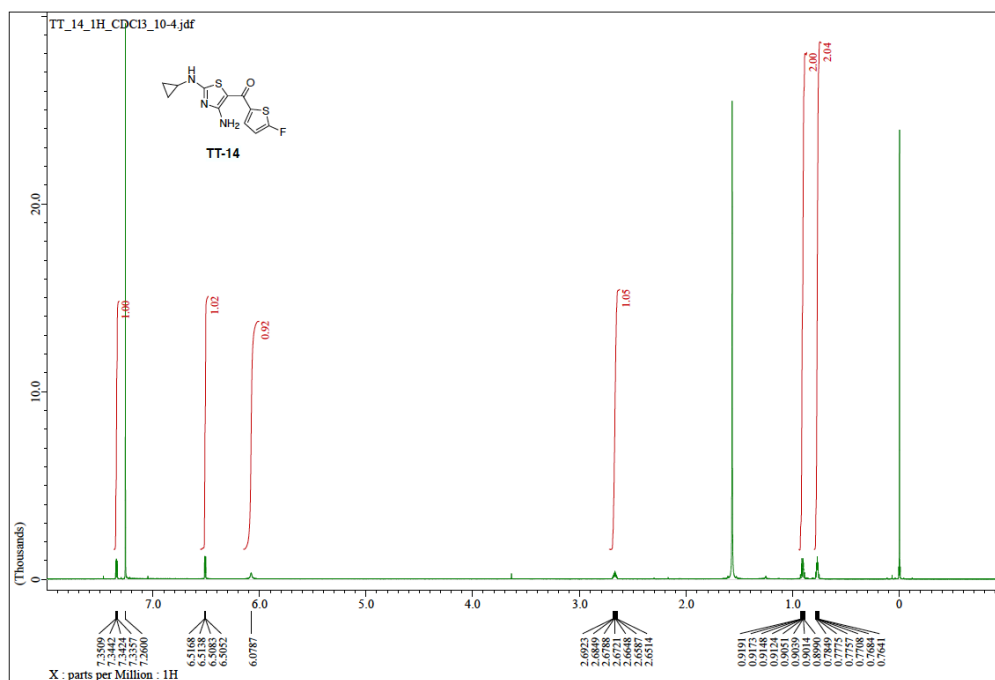

1

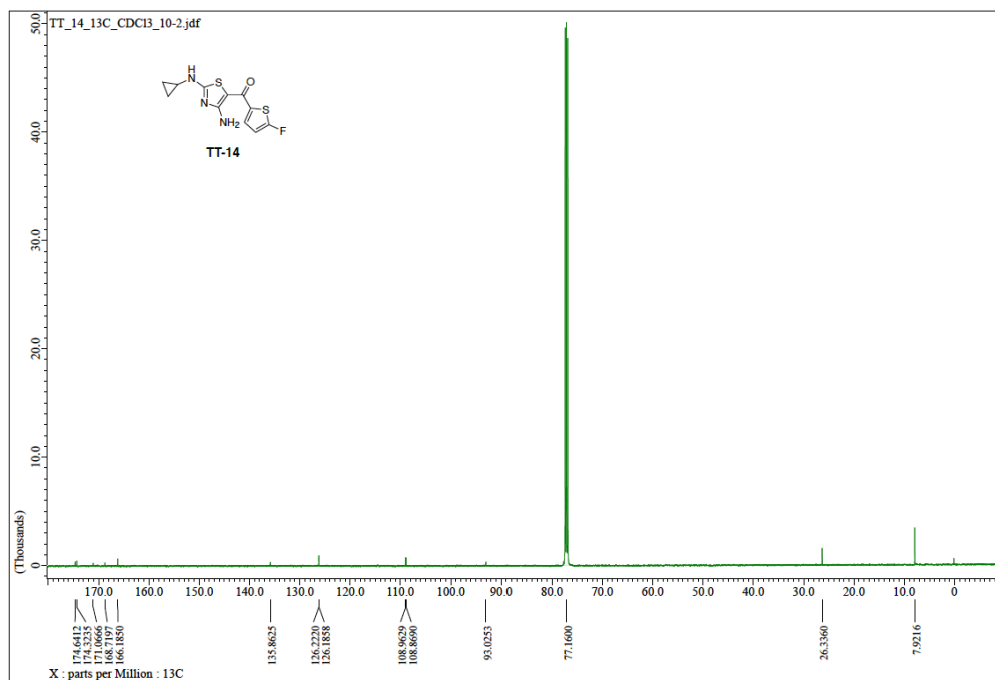

2

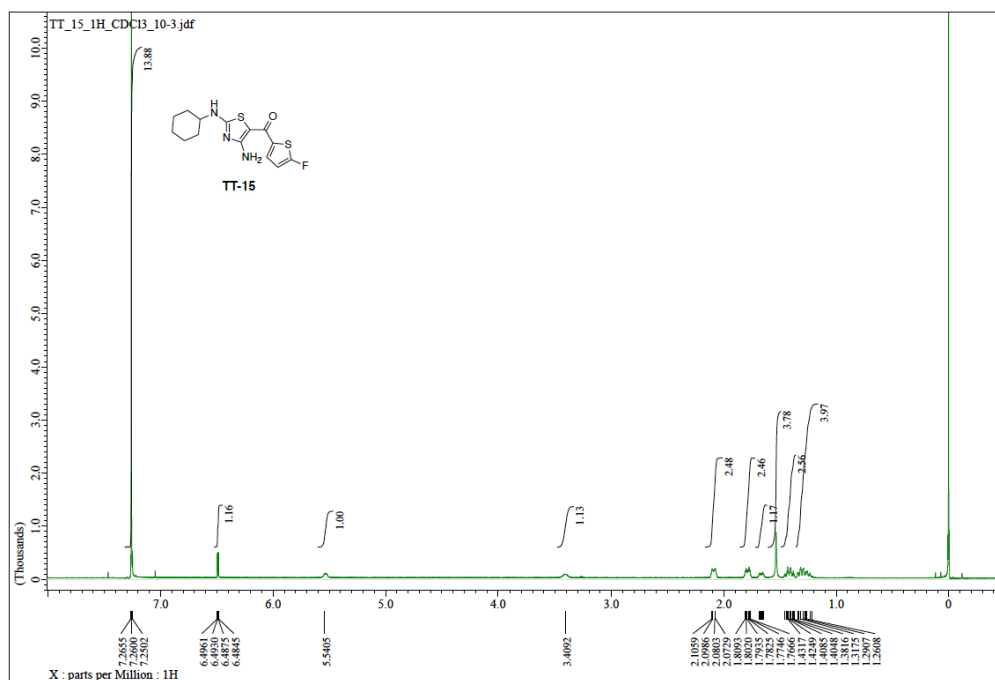

1

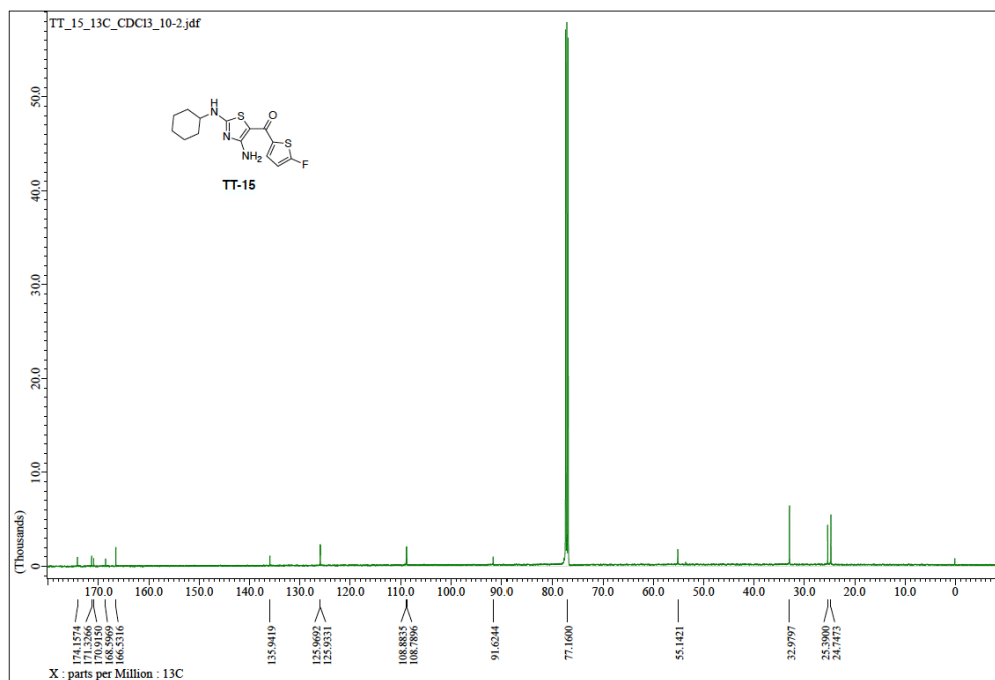

2

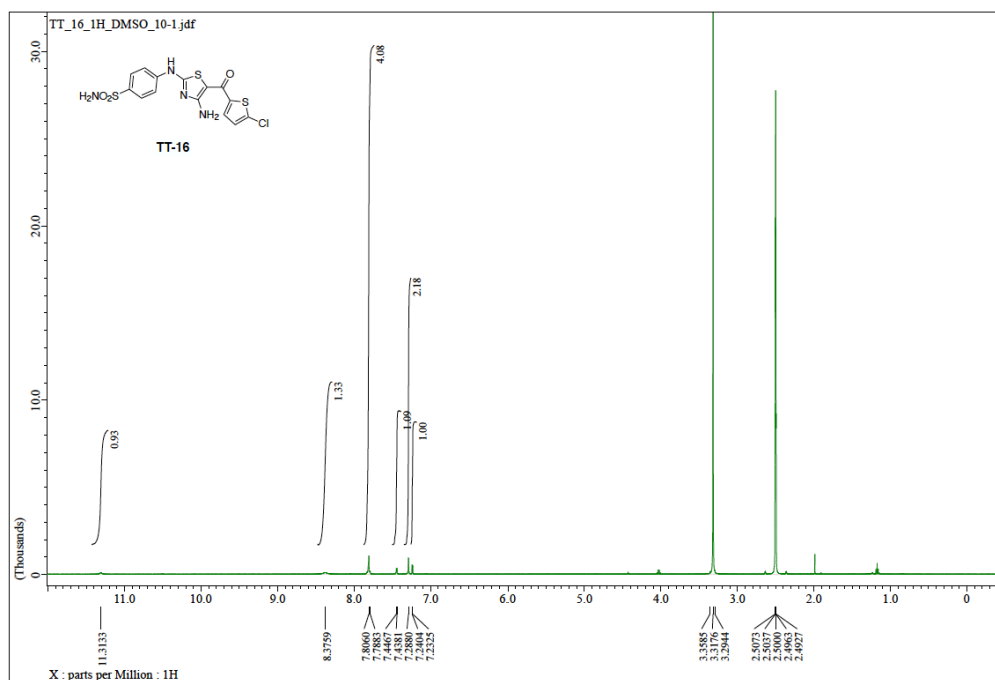

1

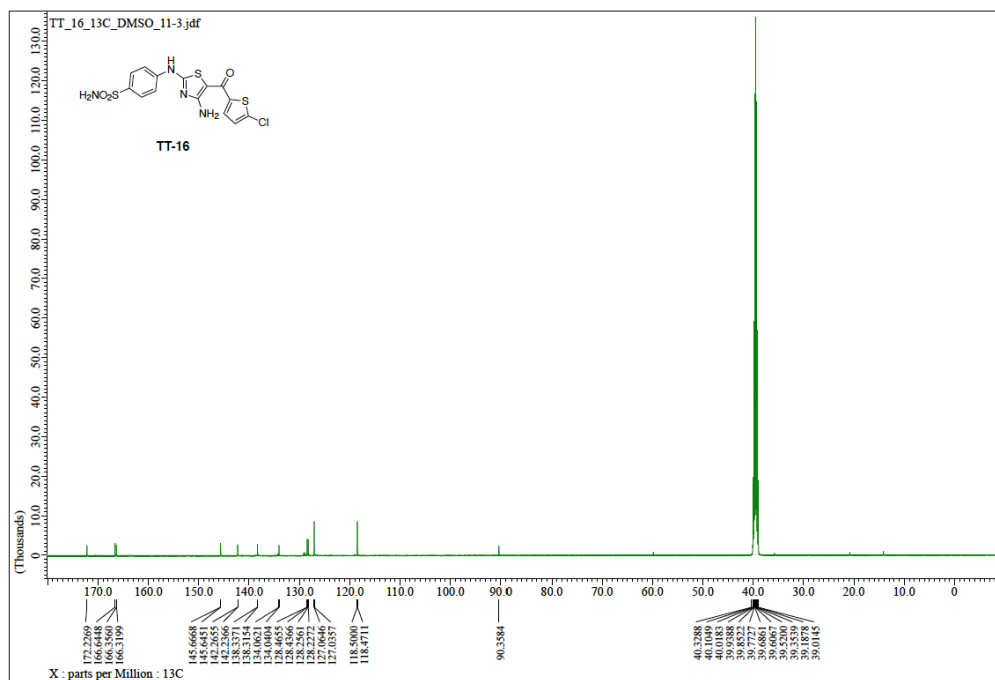

2



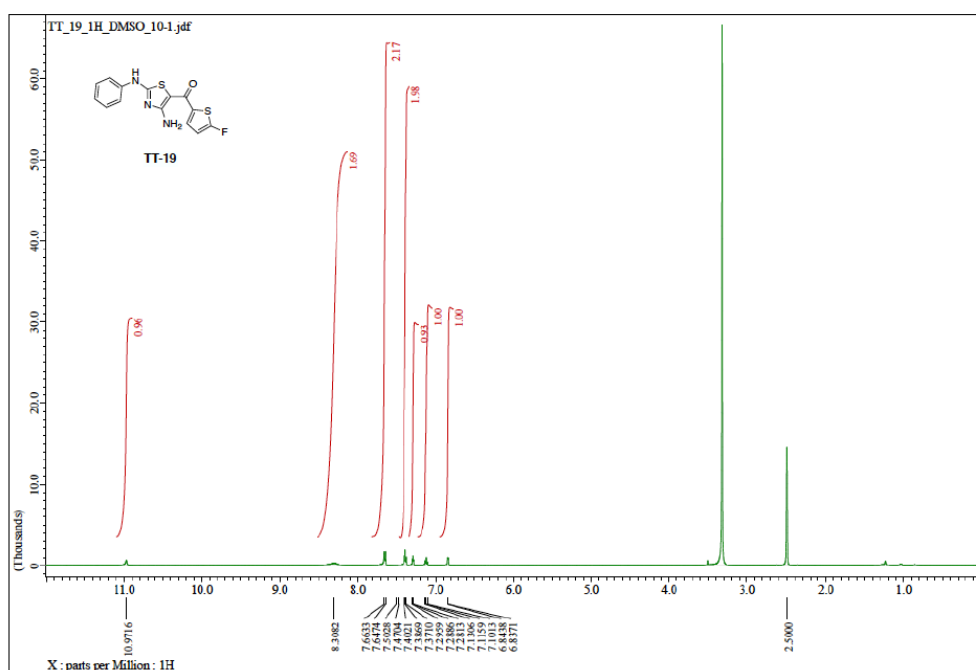

1

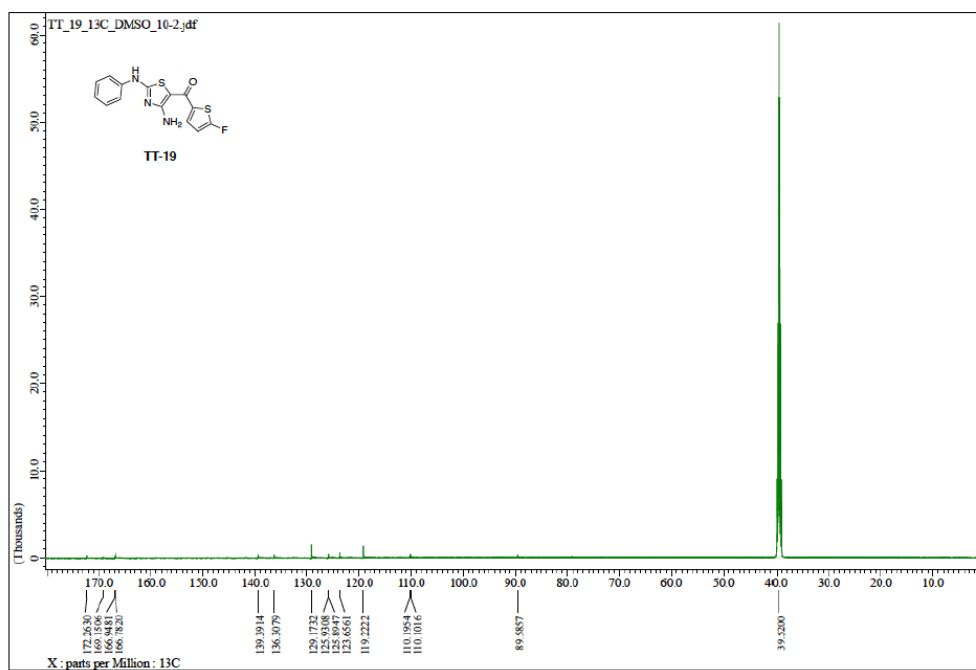

2

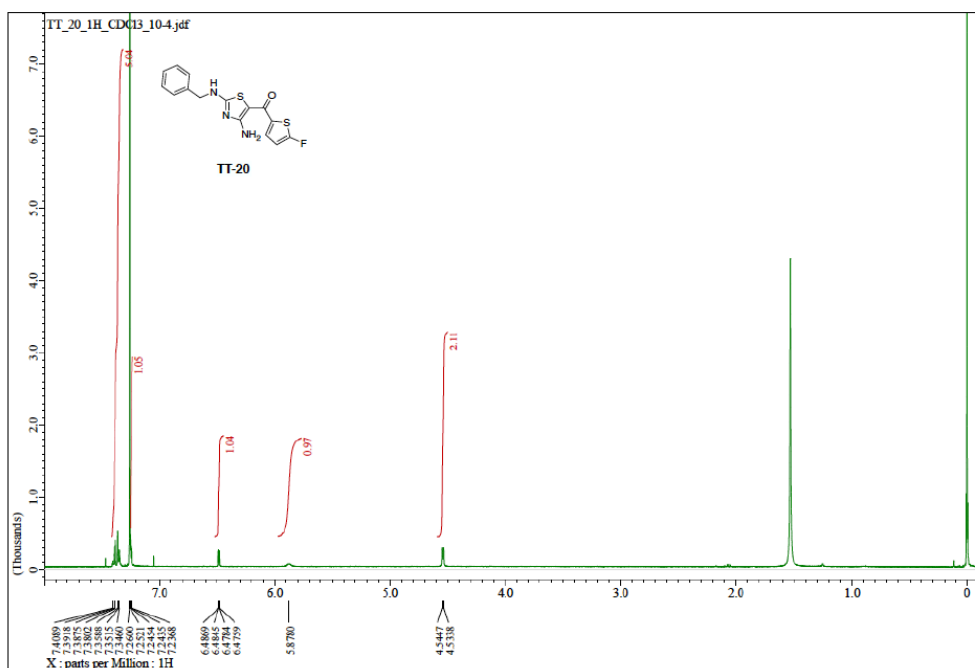

1

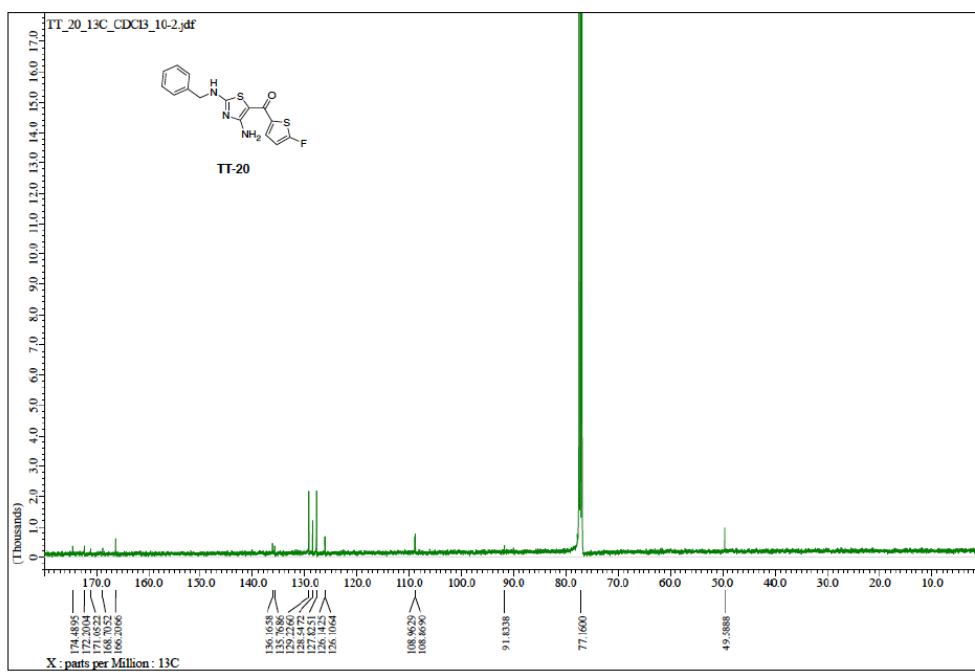

2

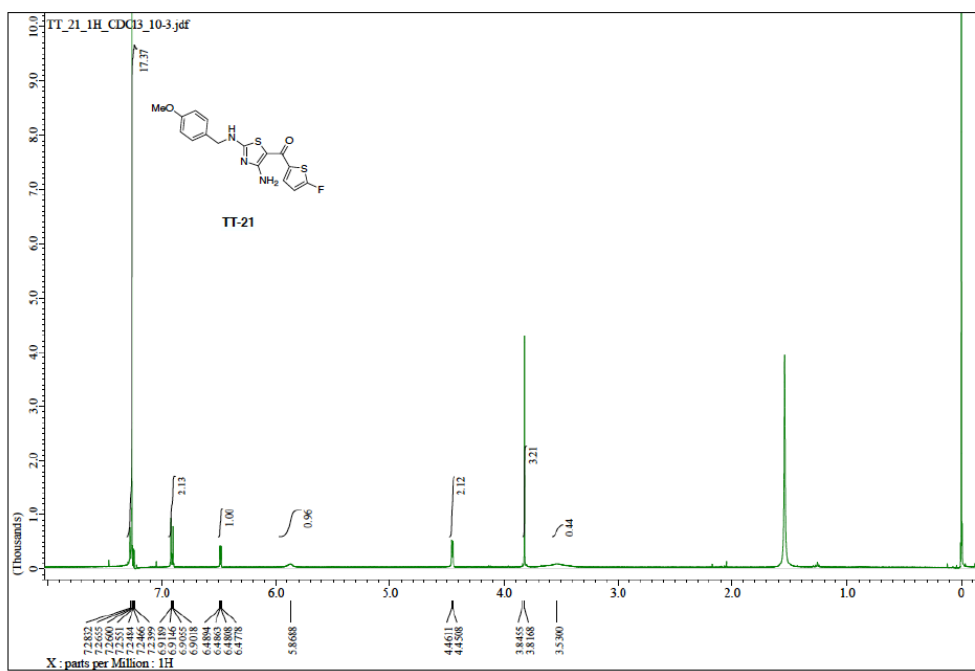

1

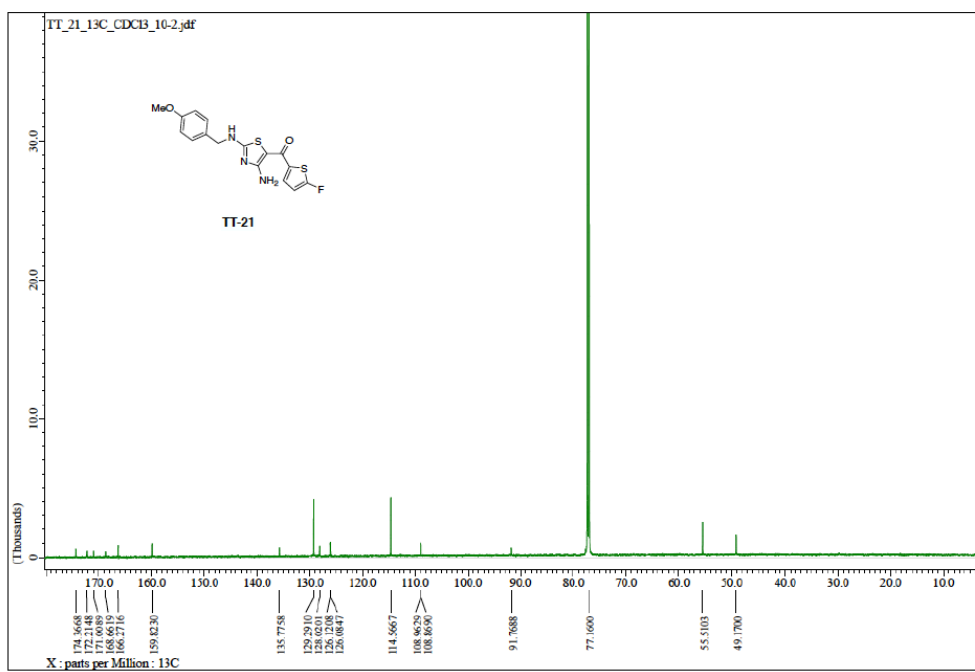

2

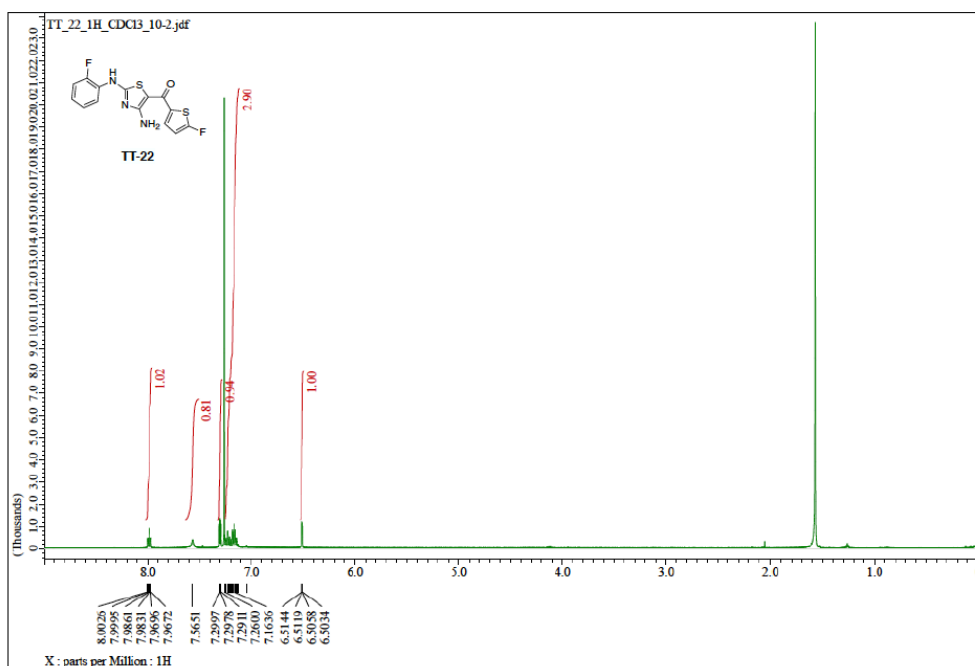

1

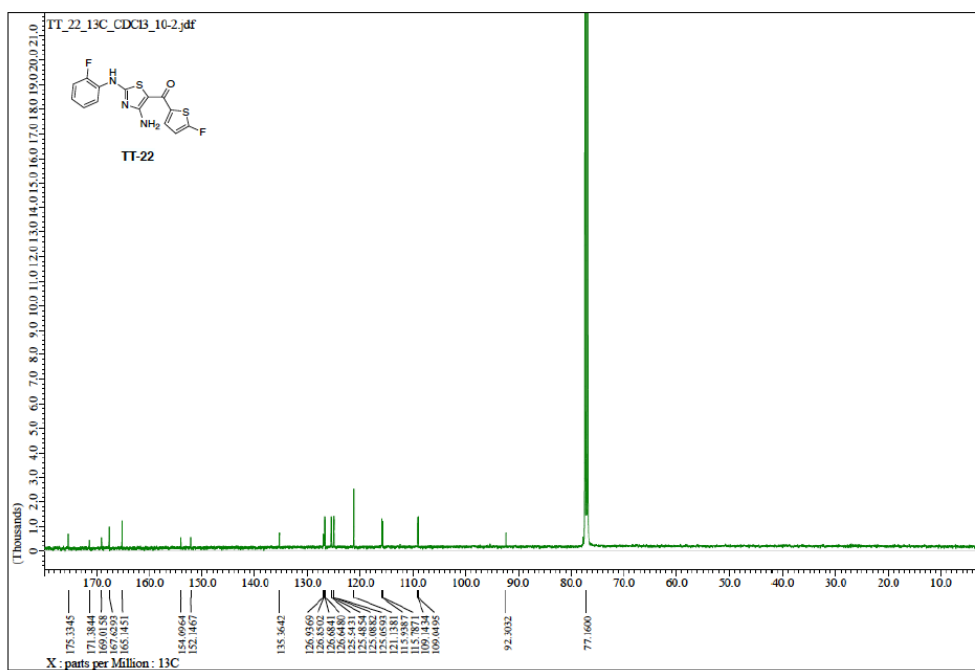

2

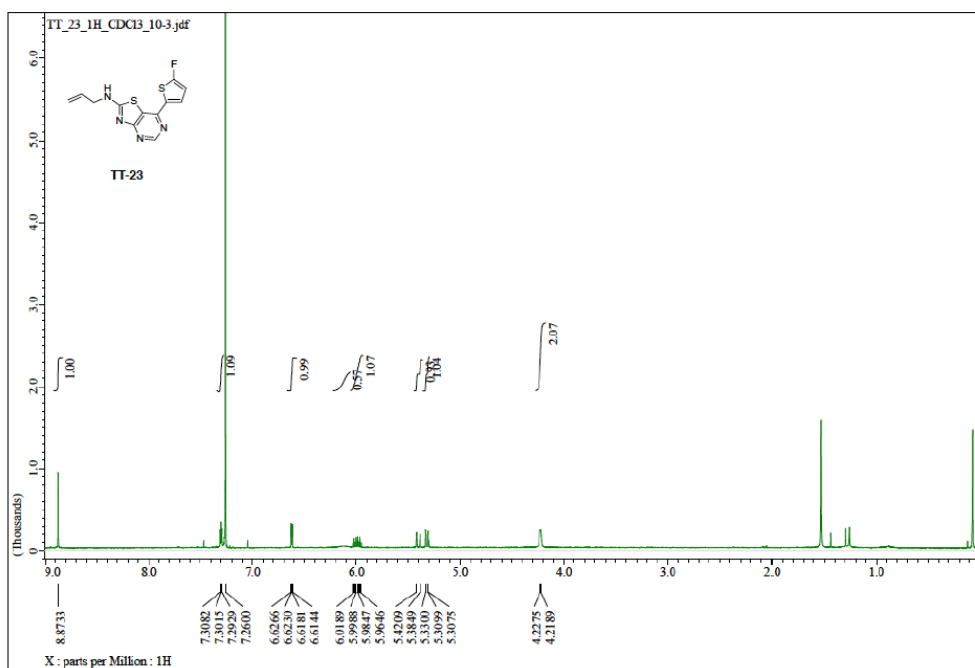

1

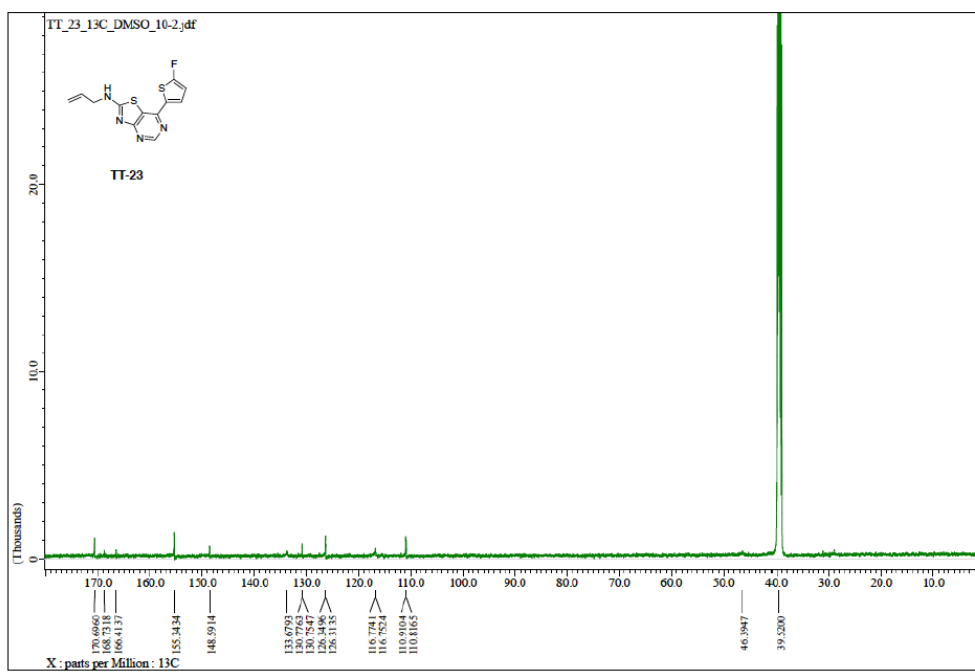

2

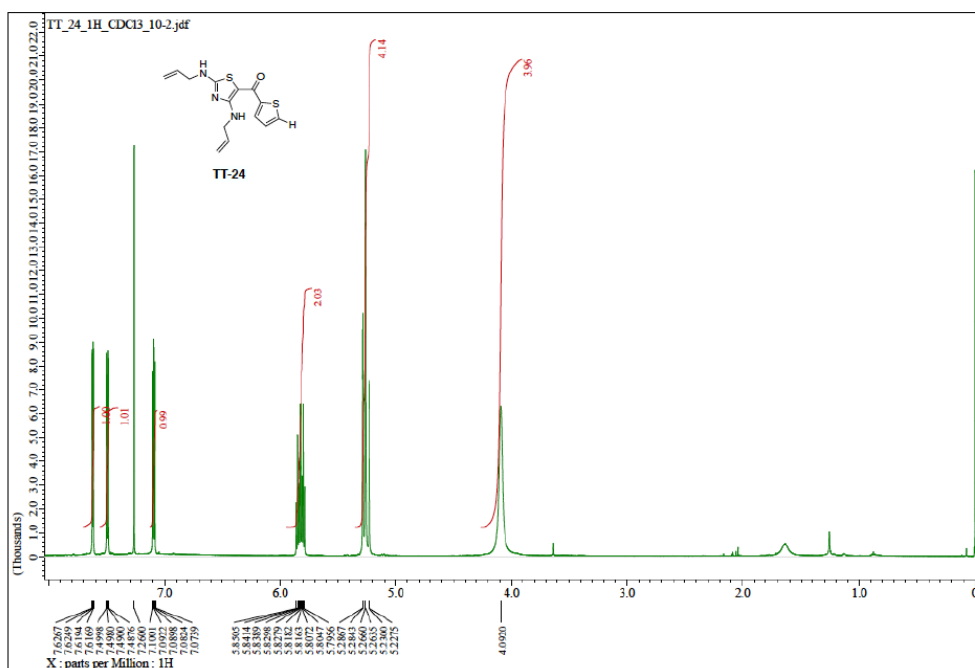

1

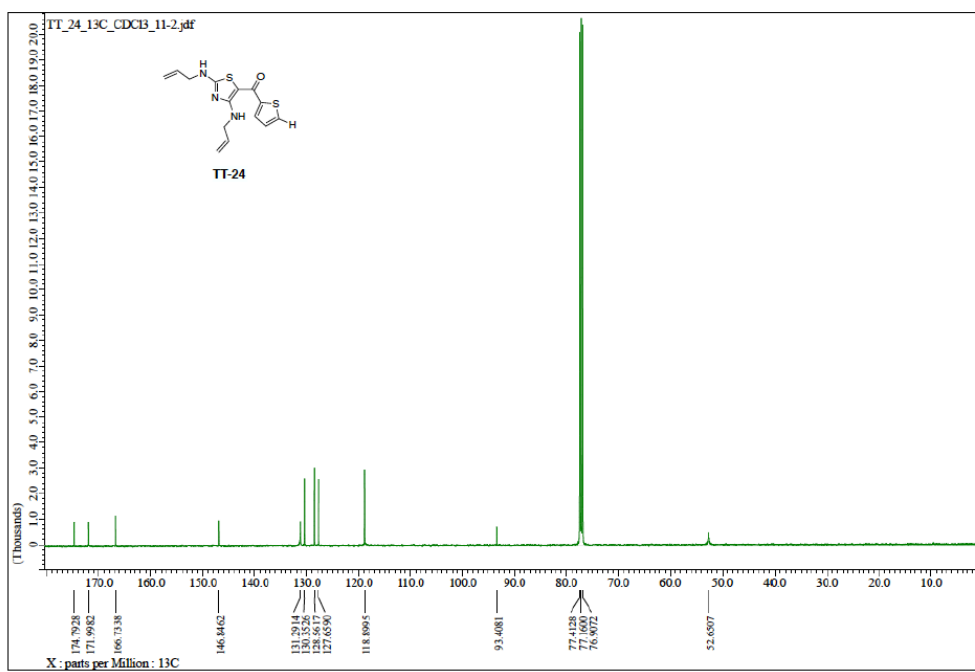

2

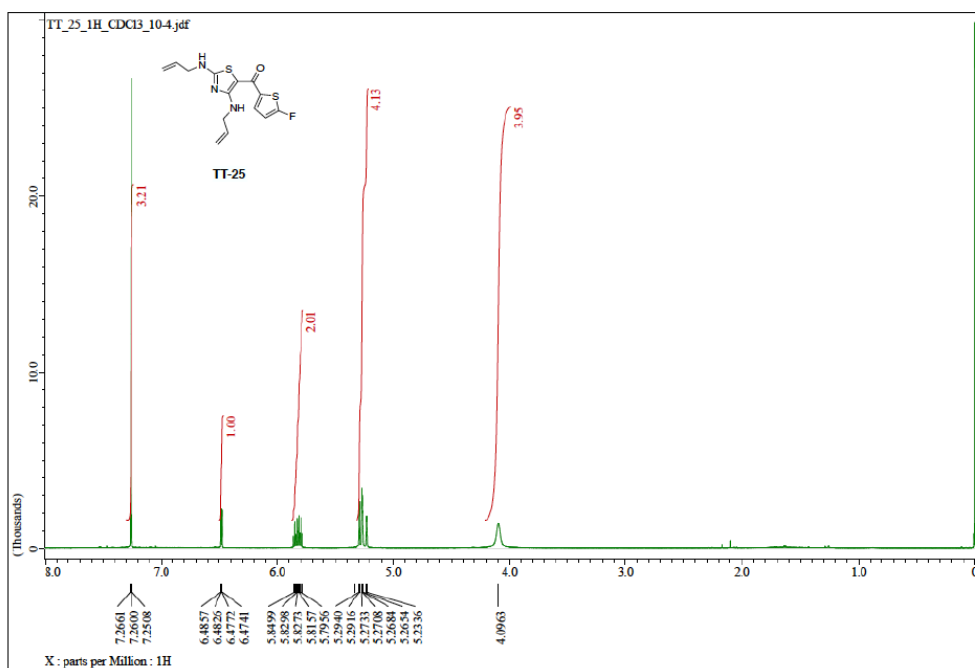

1

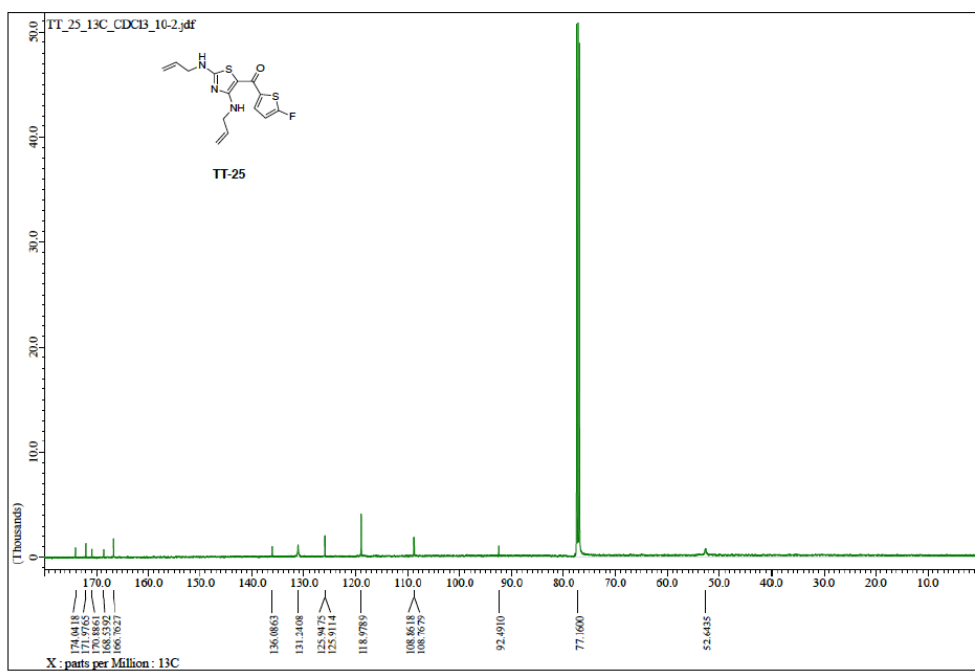

2

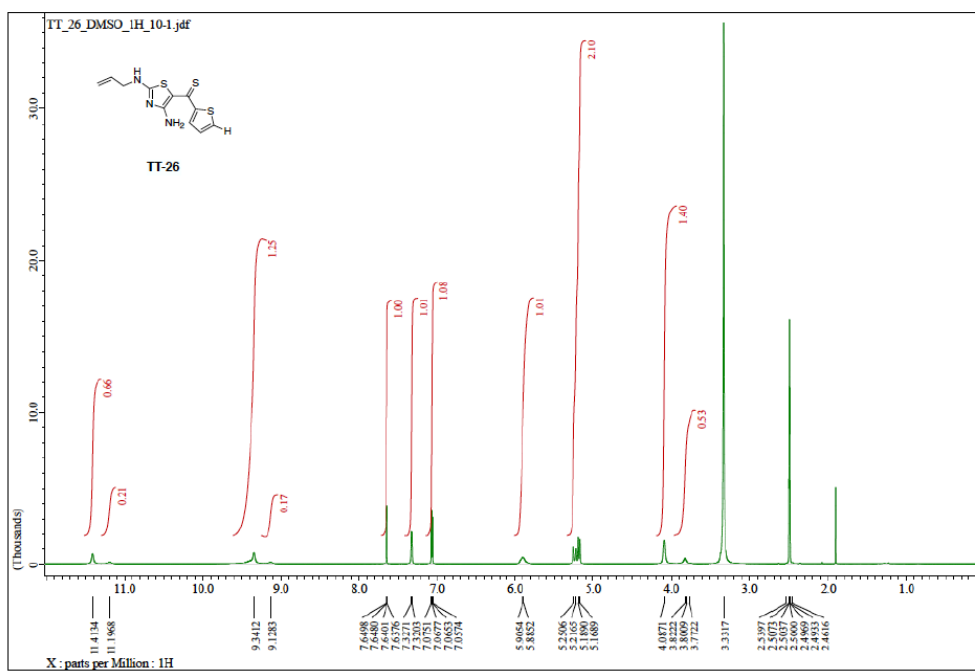

1

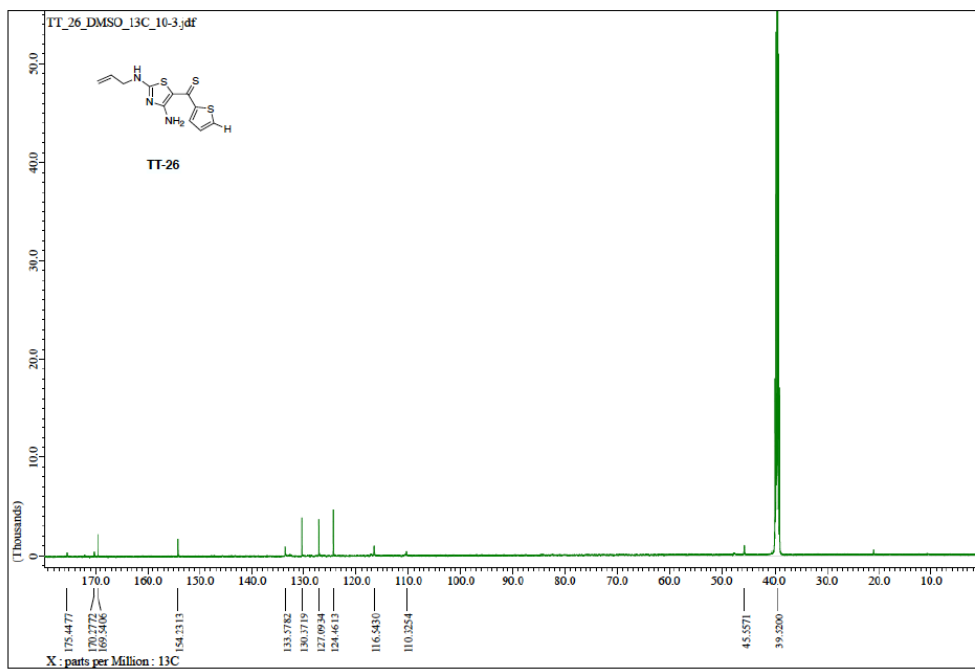

2  
3



1 **Supplemental Figures**

**A** Fluorescence reporter-based assay  
18,606 compounds

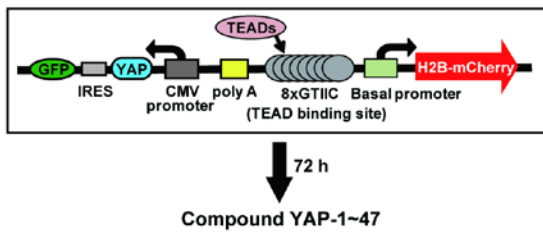

**B** TAZ activation dependent sphere formation assay  
18,458 compounds

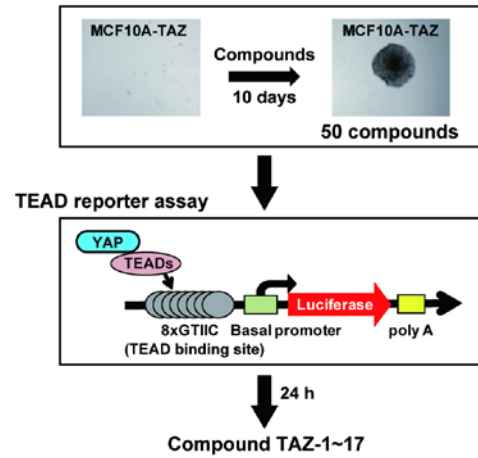

2  
3 **Supplemental Figure 1. High-throughput screening workflows to identify activators of YAP-**  
4 **TEADs complex**

5 (A, B) Screening workflow for the fluorescence reporter-based assay for screening of YAP-TEADs  
6 activators in YAP-expressing ARPE-19 cells (A), and sphere formation assay for TAZ-activators in  
7 MCF10A-TAZ cells and subsequent luciferase assay for YAP-TEADs activators in HEK293 cells (B).

8

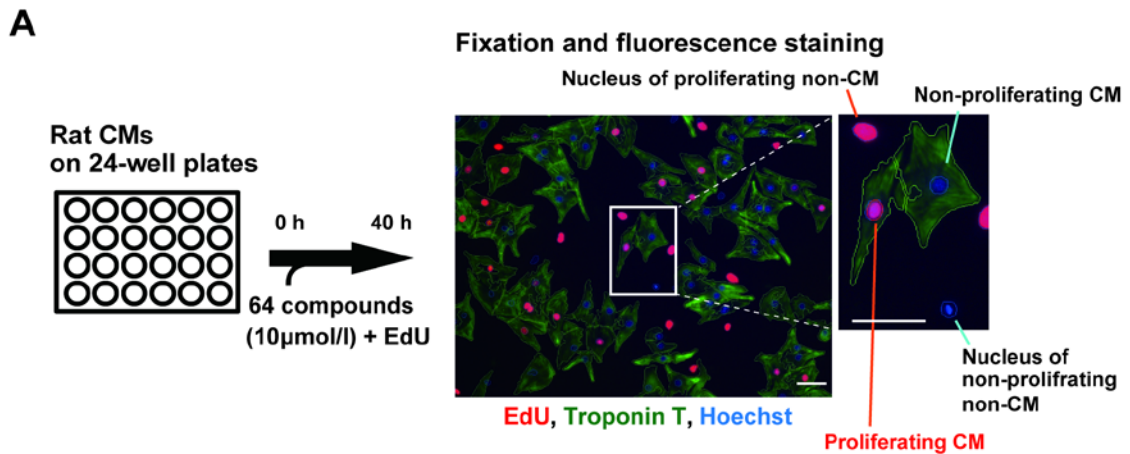

**B**

| Compounds     | 1st evaluation     | 2nd evaluation     | Compounds     | 1st evaluation     | 2nd evaluation     | Compounds | 1st evaluation | 2nd evaluation |
|---------------|--------------------|--------------------|---------------|--------------------|--------------------|-----------|----------------|----------------|
| TAZ-1         | 0.85 ± 0.18        |                    | YAP-5         | 0.39 ± 0.06        |                    | YAP-26    | 1.22 ± 0.40    | 1.30 ± 0.05    |
| TAZ-2         | 0.78 ± 0.11        |                    | YAP-6         | 0.36 ± 0.07        |                    | YAP-27    | 0.24 ± 0.08    |                |
| TAZ-3         | 1.13 ± 0.32        | 0.81 ± 0.18        | YAP-7         | 0.29 ± 0.29        |                    | YAP-28    | 0.95 ± 0.15    |                |
| TAZ-4         | 0.64 ± 0.09        |                    | YAP-8         | 0.16 ± 0.02        |                    | YAP-29    | 0.44 ± 0.10    |                |
| TAZ-5         | 1.24 ± 0.22        | 0.98 ± 0.19        | YAP-9         | 0.14 ± 0.05        |                    | YAP-30    | 0.01 ± 0.01    |                |
| TAZ-6         | 1.12 ± 0.09        | 0.71 ± 0.20        | YAP-10        | 0.43 ± 0.07        |                    | YAP-31    | 0.45 ± 0.19    |                |
| TAZ-7         | 0.93 ± 0.16        |                    | YAP-11        | 0.58 ± 0.17        |                    | YAP-32    | 0.12 ± 0.05    |                |
| TAZ-8         | 1.25 ± 0.24        | 0.65 ± 0.15        | YAP-12        | 0.22 ± 0.10        |                    | YAP-33    | 0.51 ± 0.13    |                |
| TAZ-9         | 0.95 ± 0.25        |                    | YAP-13        | 0.59 ± 0.13        |                    | YAP-34    | 0.64 ± 0.09    |                |
| TAZ-10        | 1.21 ± 0.12        | 0.96 ± 0.11        | YAP-14        | 0.34 ± 0.18        |                    | YAP-35    | 0.72 ± 0.12    |                |
| TAZ-11        | 1.21 ± 0.20        | 0.78 ± 0.11        | YAP-15        | 0.39 ± 0.02        |                    | YAP-36    | 1.36 ± 0.41    | 0.86 ± 0.08    |
| <b>TAZ-12</b> | <b>2.80 ± 0.41</b> | <b>1.70 ± 0.34</b> | YAP-16        | 0.08 ± 0.04        |                    | YAP-37    | 0.67 ± 0.17    |                |
| TAZ-13        | 1.07 ± 0.12        | 0.76 ± 0.18        | YAP-17        | 0.07 ± 0.03        |                    | YAP-38    | 0.53 ± 0.12    |                |
| TAZ-14        | 0.36 ± 0.09        |                    | YAP-18        | 1.59 ± 0.34        |                    | YAP-39    | 0.15 ± 0.23    |                |
| TAZ-15        | 1.12 ± 0.17        | 0.60 ± 0.17        | YAP-19        | 0.09 ± 0.04        |                    | YAP-40    | 0.35 ± 0.28    |                |
| TAZ-16        | 1.14 ± 0.07        | 0.76 ± 0.09        | YAP-20        | 0.13 ± 0.02        |                    | YAP-41    | 0.41 ± 0.03    |                |
| TAZ-17        | 1.07 ± 0.17        | 0.70 ± 0.12        | YAP-21        | 1.62 ± 0.28        | 0.81 ± 0.24        | YAP-42    | 0.59 ± 0.19    |                |
| YAP-1         | 0.01 ± 0.02        |                    | <b>YAP-22</b> | <b>1.58 ± 0.29</b> | <b>1.12 ± 0.16</b> | YAP-43    | 0.79 ± 0.24    |                |
| YAP-2         | 0.31 ± 0.09        |                    | YAP-23        | 0.80 ± 0.06        |                    | YAP-44    | 0.05 ± 0.03    |                |
| YAP-3         | 0.24 ± 0.15        |                    | YAP-24        | 0.14 ± 0.01        |                    | YAP-45    | 0.06 ± 0.01    |                |
| YAP-4         | 1.41 ± 0.28        | 0.84 ± 0.11        | YAP-25        | 1.32 ± 0.14        | 0.80 ± 0.21        | YAP-46    | 0.01 ± 0.01    |                |
|               |                    |                    |               |                    |                    | YAP-47    | 0.94 ± 0.20    |                |

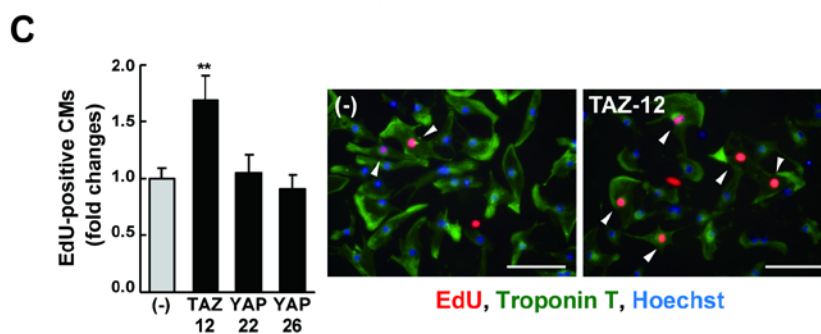

1

2 **Supplemental Figure 2. Screening workflow for evaluating CM proliferation**

3 (A) EdU incorporation in DNA synthesizing CMs stained with cardiac troponin T antibody were  
 4 evaluated. Scale bar: 50 μm. (B) Effects of 64 compounds (10 μM) on DNA synthesis. Data are shown  
 5 as the ratio of EdU-incorporated CMs as compared to untreated CMs under starved conditions (0.1%  
 6 FCS). The second evaluation was conducted for 17 compounds that showed equivalent or more effective  
 7 DNA forming activities in the first evaluation. YAP-18 was excluded because of low CM viability. n =  
 8 3 per group. (C) Ratios of EdU-positive CMs after treatment with 3 compounds (TAZ-12, YAP-22, and

1 YAP-26). A representative image of TAZ-12-treated CMs is shown. Arrow heads, positive CMs. n = 3  
2 per group. Scale bar: 100  $\mu$ m.  $**p < 0.01$  versus the untreated control.  
3

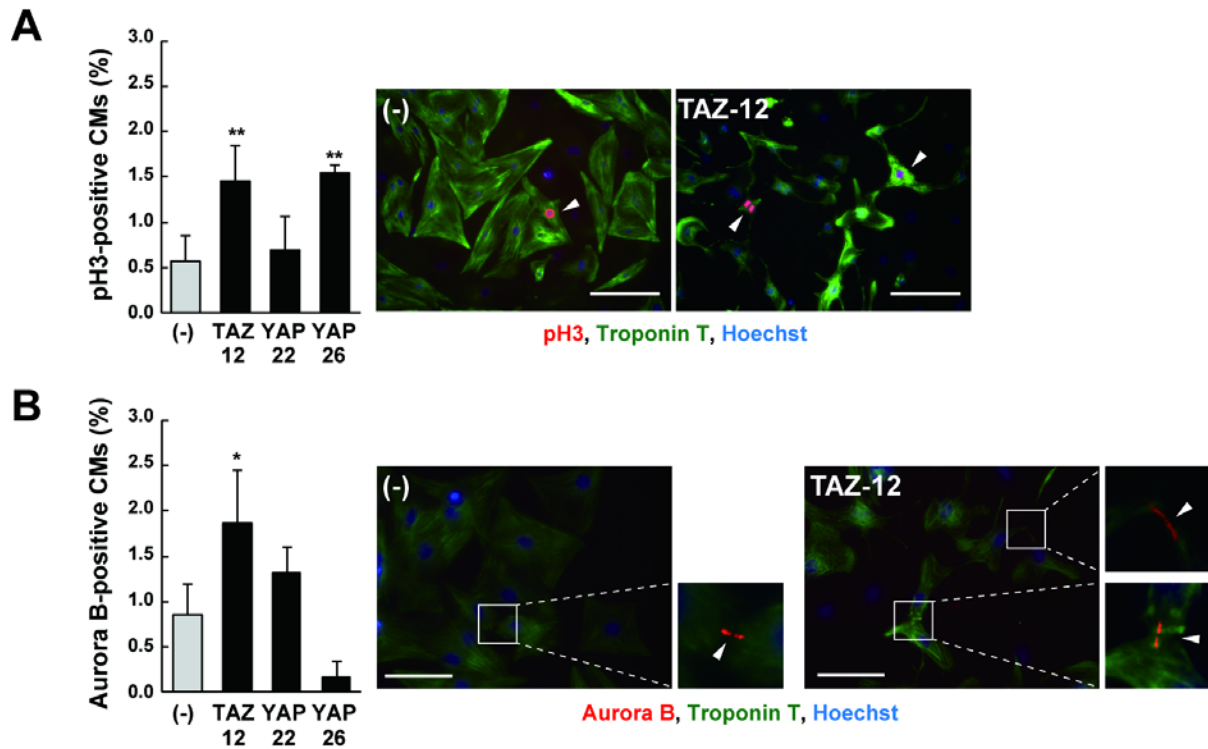

1

2 **Supplemental Figure 3. Effects of compounds on CM karyokinesis, cytokinesis, and viability**

3 (A, B) Percentages of pH3-positive (A) and Aurora B-positive (B) CMs after treatment with 3  
 4 compounds (TAZ-12, YAP-22, and YAP-26). A representative image of TAZ-12-treated CMs is shown.  
 5 Arrow heads, positive CMs. n = 3 or 6 (A), and 3 (B) per group. Scale bars: 100 μm in A; 50 μm in B.

6 \* $p < 0.05$ , \*\* $p < 0.01$  versus the untreated control.

7

**A**

| 1st evaluation |                    |                    |
|----------------|--------------------|--------------------|
| Compounds      | ratios to control  | ratios to TAZ-12   |
| TT-1           | 0.59 ± 0.07        | 0.24 ± 0.03        |
| TT-2           | 1.19 ± 0.36        | 0.75 ± 0.23        |
| TT-3           | 1.33 ± 0.40        | 0.93 ± 0.28        |
| TT-4           | 1.34 ± 0.29        | 0.67 ± 0.14        |
| TT-5           | 1.47 ± 0.08        | 0.82 ± 0.04        |
| TT-6           | 0.25 ± 0.06        | 0.12 ± 0.03        |
| TT-7           | 1.02 ± 0.14        | 0.51 ± 0.07        |
| TT-8           | 1.09 ± 0.03        | 0.60 ± 0.02        |
| <b>TT-9</b>    | <b>2.78 ± 0.55</b> | <b>1.50 ± 0.29</b> |
| <b>TT-10</b>   | <b>3.53 ± 0.30</b> | <b>1.65 ± 0.14</b> |
| TT-11          | 1.64 ± 0.33        | 0.88 ± 0.18        |
| <b>TT-12</b>   | <b>2.32 ± 0.11</b> | <b>1.45 ± 0.07</b> |
| <b>TT-13</b>   | <b>3.47 ± 0.00</b> | <b>1.76 ± 0.00</b> |
| TT-14          | 0.67 ± 0.41        | 0.26 ± 0.16        |
| TT-15          | 0.20 ± 0.13        | 0.10 ± 0.06        |
| TT-16          | 1.68 ± 0.24        | 0.68 ± 0.10        |
| TT-17          | 0.36 ± 0.19        | 0.15 ± 0.08        |
| TT-18          | 0.21 ± 0.04        | 0.12 ± 0.02        |
| TT-19          | 0.07 ± 0.04        | 0.04 ± 0.02        |
| TT-20          | 0.97 ± 0.10        | 0.49 ± 0.05        |
| TT-21          | 0.85 ± 0.31        | 0.28 ± 0.10        |
| TT-22          | 1.73 ± 0.14        | 0.57 ± 0.04        |
| TT-23          | 0.80 ± 0.10        | 0.41 ± 0.05        |
| TT-24          | 0.12 ± 0.05        | 0.08 ± 0.04        |
| TT-25          | 0.18 ± 0.02        | 0.06 ± 0.01        |
| TT-26          | 0.06 ± 0.02        | 0.03 ± 0.01        |

**B**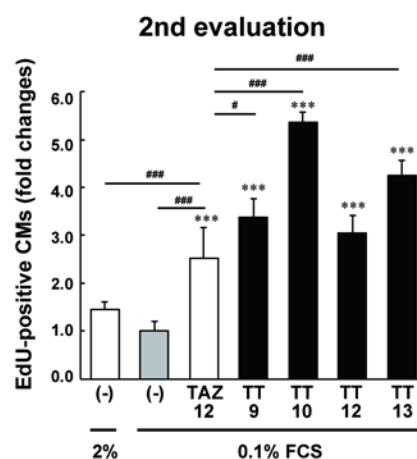**C**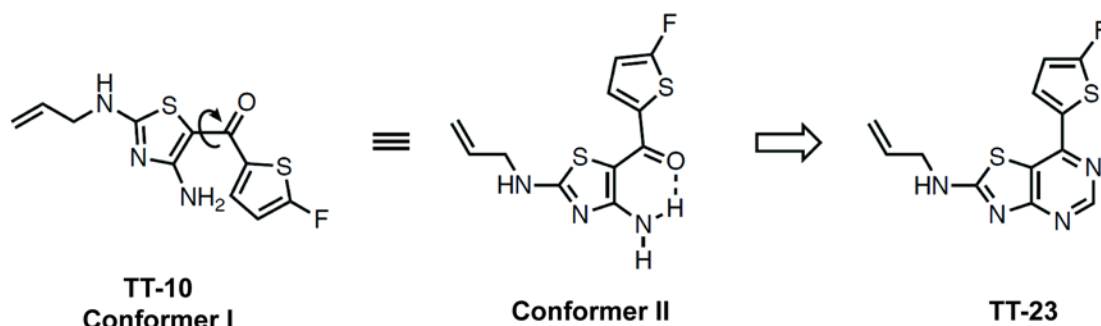

1

2 **Supplemental Figure 4. Effects of 26 analogues on CM proliferation**

3 (A) Effects of 26 analogues (10 μM) on DNA synthesis in CMs. Data are shown as the ratio of EdU-  
 4 incorporated CMs as compared to untreated CMs. n = 3–4 per group. (B) Ratios of EdU-positive CMs  
 5 after treatment with the indicated compounds. n = 5 per group. (C) The motivation of synthesis of  
 6 tethered structure, TT-23. TT-10 can form either conformer I or conformer II, and TT-23 was  
 7 synthesized to understand the influence of these conformers on CM proliferation. \*\*\**p* < 0.001 versus  
 8 the untreated control, #*p* < 0.05, ###*p* < 0.001 versus TAZ-12.

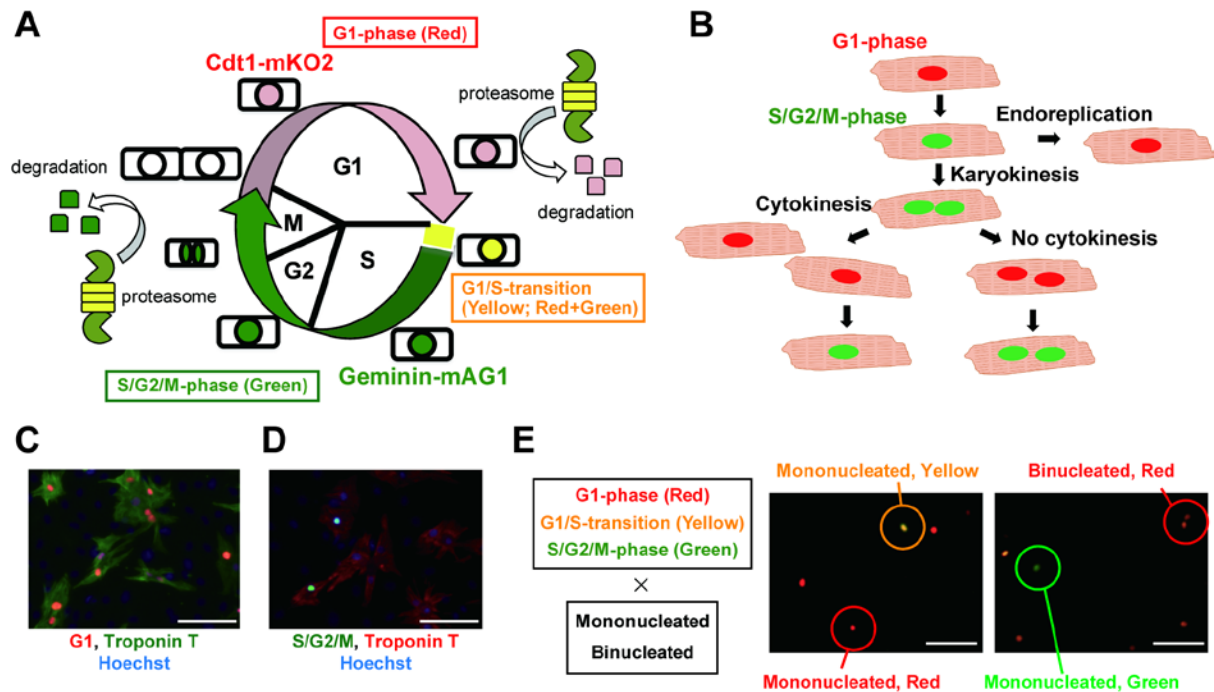

1  
2  
3  
4  
5  
6  
7  
8  
9  
10  
11  
12  
13  
14  
15

**Supplemental Figure 5. CM-specific expression of Fucci indicators**

(A) Fluorescent ubiquitination-based cell cycle indicator (Fucci) system. The Fucci probe was generated by fusing Kusabira-Orange2 (mKO2, red fluorescent protein) and Azami-Green1 (mAG1, green fluorescent protein) to the ubiquitylation domains of human Cdt1 [hCdt1(30/120)] and Geminin [hGem(1/110)], respectively. The two chimeric proteins, mKO2-hCdt1(30/120) and mAGhGem(1/110), accumulate reciprocally in the nuclei during the cell cycle, labeling individual G1-phase nuclei in red and S/G2/M-phase nuclei in green, which is mediated by the ubiquitin proteasome system. (B) Scheme illustrating proliferation of CMs transfected with CM-specific Fucci expression adenoviruses. (C, D, E) Establishment of adenoviruses for CM-specific Fucci expression. CMs were infected with the CM-specific Fucci expression adenovirus, *Tnnt2*-Fucci G1 Orange (C) or *Tnnt2*-Fucci S/G2/M Green (D) for 72 hours and then stained with troponin T antibody. Note the CM-specific Fucci expression. (E) CMs infected with two Fucci adenoviruses were classified based on two criteria: cell cycle and nuclear number. Scale bar: 100  $\mu$ m.

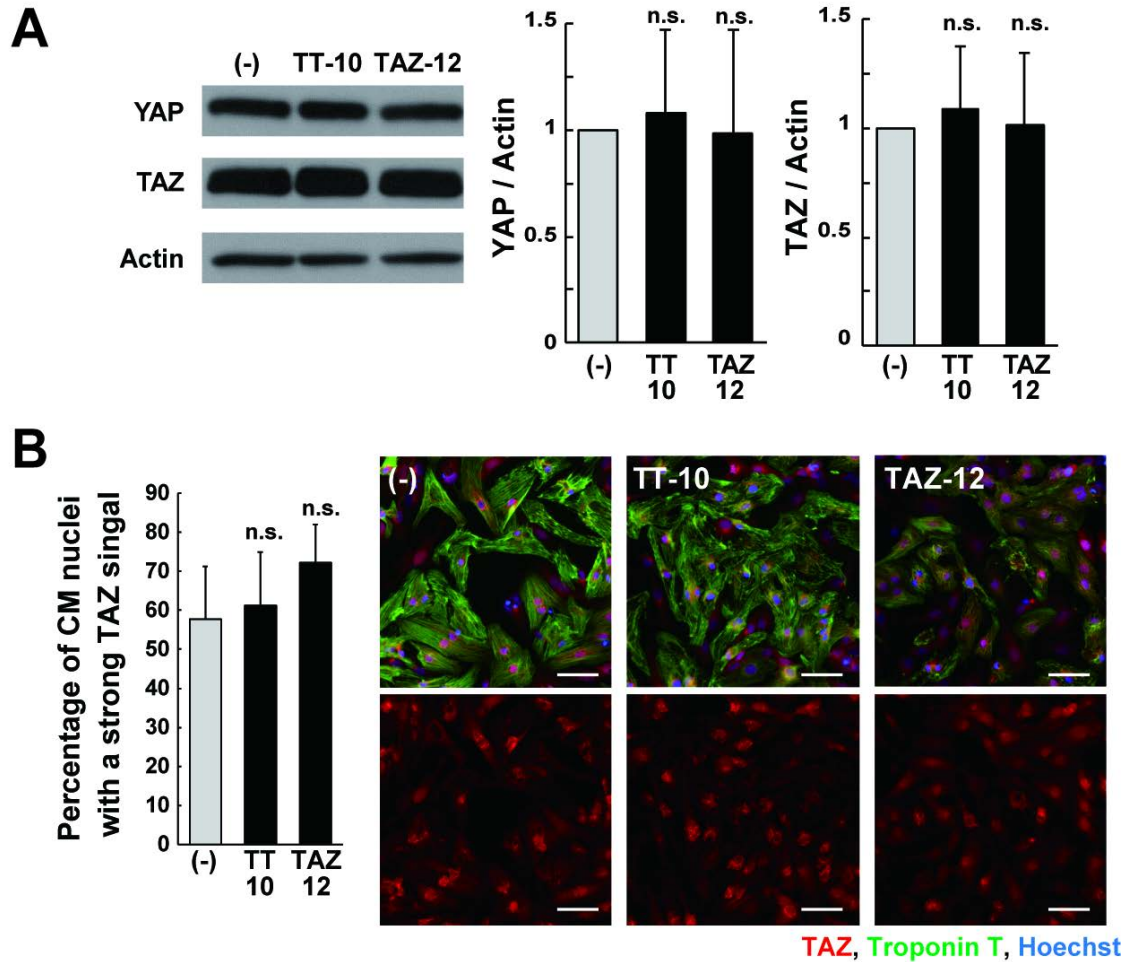

1  
2  
3  
4  
5  
6  
7  
8

**Supplemental Figure 6. Effects of TT-10 on protein expression of YAP and TAZ**

(A) Western blot analysis of YAP and TAZ. CMs were treated with 10  $\mu$ M of each compound for 6 hours under starved conditions.  $n = 4$  per group. (B) Quantitative imaging assay for TAZ nuclear translocation. CMs were treated with the indicated reagents at the following concentrations for 24 hours: TT-10, 10  $\mu$ M; TAZ-12, 10  $\mu$ M.  $n = 6$  per group. Scale bar: 50  $\mu$ m. n.s.  $p > 0.05$  versus the untreated control.

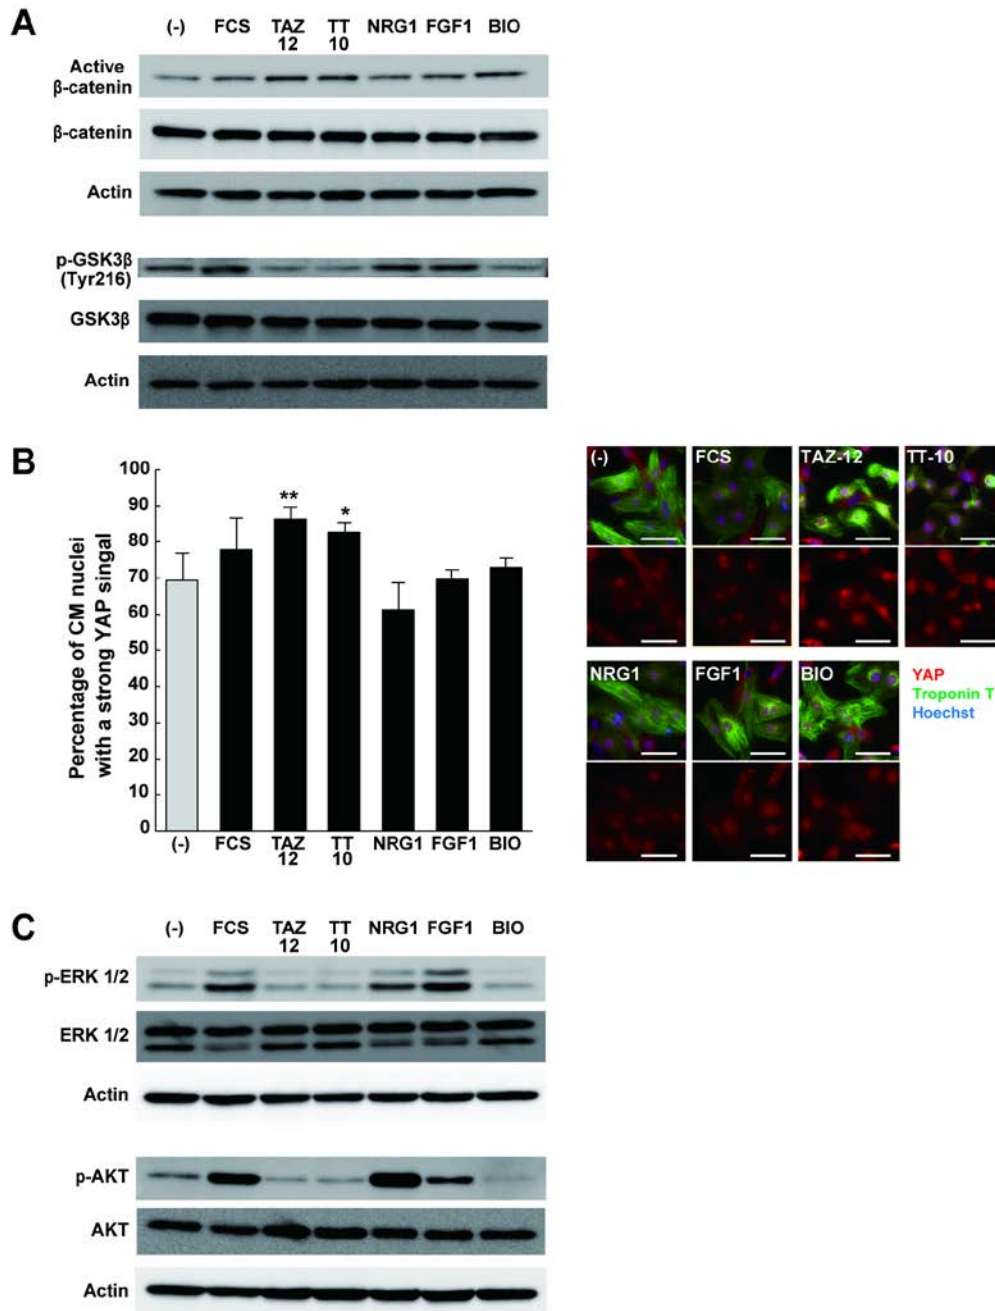

**Supplemental Figure 7. Effects of TT-10 on CM proliferative signals**

(A) Western blot analysis for Wnt/ $\beta$ -catenin signaling pathway. CMs were treated with the indicated reagents for 6 hours under starved conditions. FCS, 2%; TAZ-12, 10  $\mu$ M; TT-10, 10  $\mu$ M; NRG1, 100 ng/ml; FGF1, 100 ng/ml; BIO, 1  $\mu$ M. (B) Quantitative imaging assay for YAP nuclear translocation. CMs were treated with the indicated reagents at the following concentrations for 24 hours.  $n = 5$  per group. Representative images are shown in the right panel. Scale bar: 50  $\mu$ m. (C) Western blot analysis for ERK and AKT signaling pathway. CMs were treated with the indicated reagents for 15 minutes under starved conditions. \* $p < 0.05$ , \*\* $p < 0.01$  versus the untreated control.

10



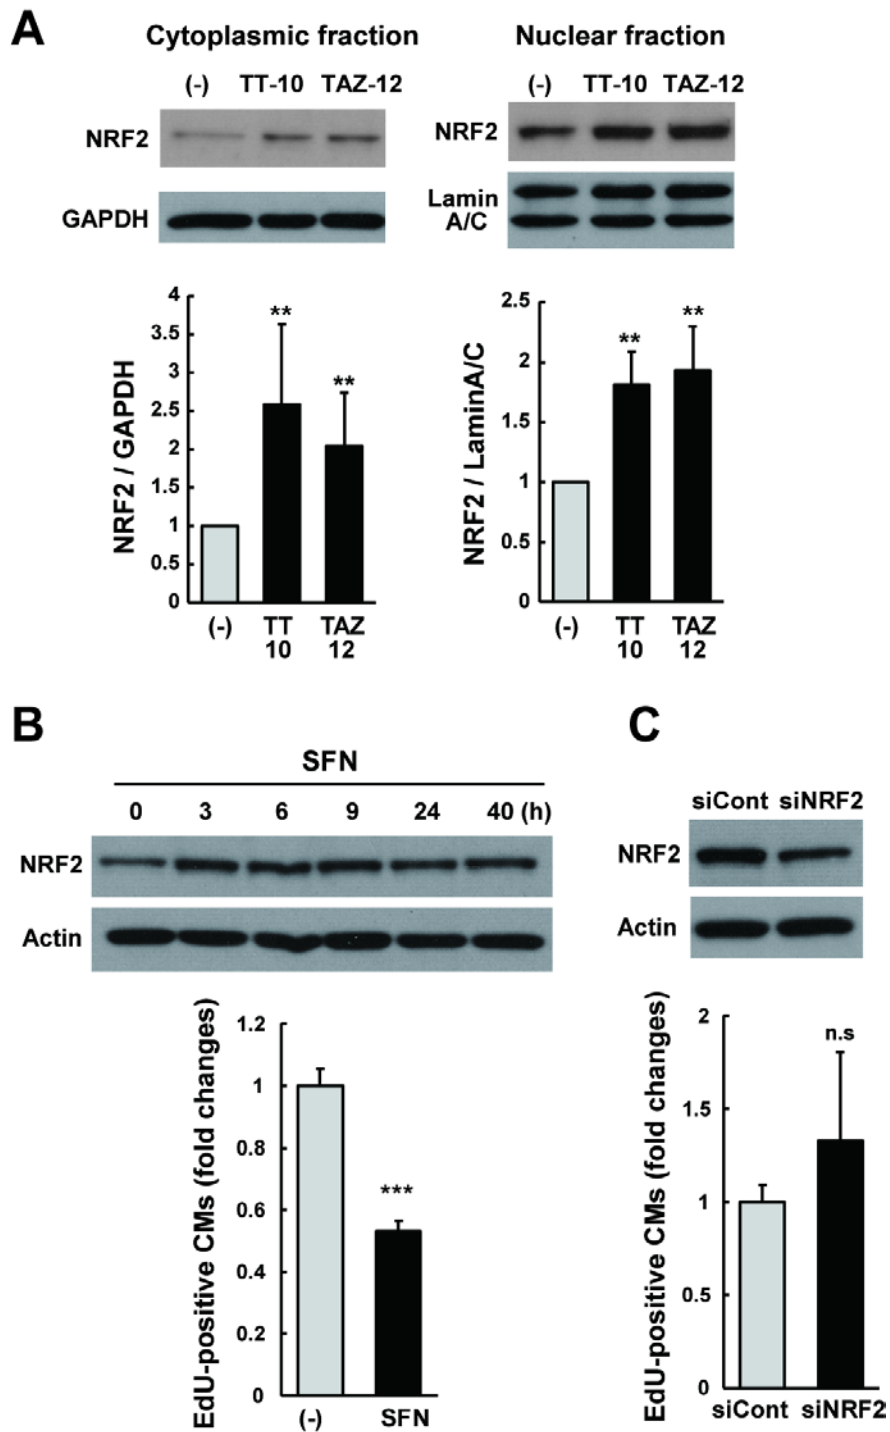

1

2 **Supplemental Figure 8. Effects of NRF2 on CM proliferation**

3 (A) Western blot analysis of NRF2 in cytoplasmic and nuclear fractions. CMs were treated with 10  $\mu$ M  
 4 of each compound for 6 hours under starved conditions. n = 6 per group. (B) Effects of sulforaphane  
 5 (SFN 5  $\mu$ M; a NRF2 activator) on NRF2 expression and DNA synthesis in CMs. NRF2 expression was  
 6 analyzed at the indicated hours after treatment (upper panel). An EdU-incorporation assay (lower panel)  
 7 was conducted over 40 hours. n = 3 per group. (C) Effects of NRF2 knockdown (upper panel) on DNA

- 1 synthesis in CMs (lower panel). CMs transfected with NRF2 siRNA were treated with EdU for 40 hours.
- 2 n = 4 per group. n.s.  $p > 0.05$ , \*\* $p < 0.01$ , \*\*\* $p < 0.001$  versus the untreated control.
- 3

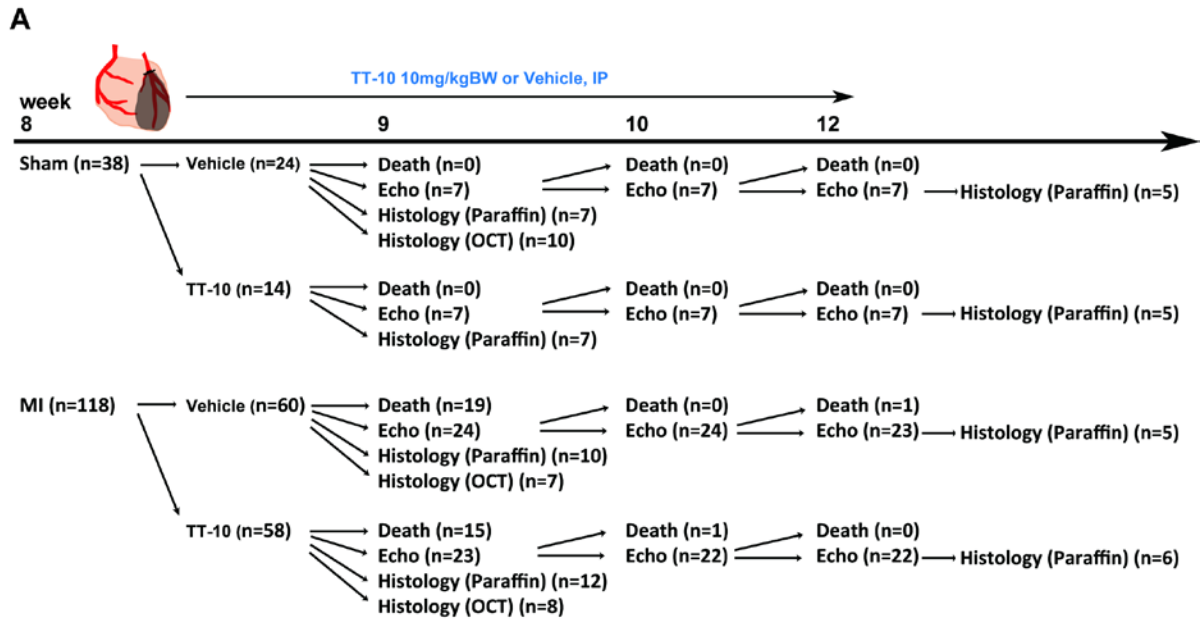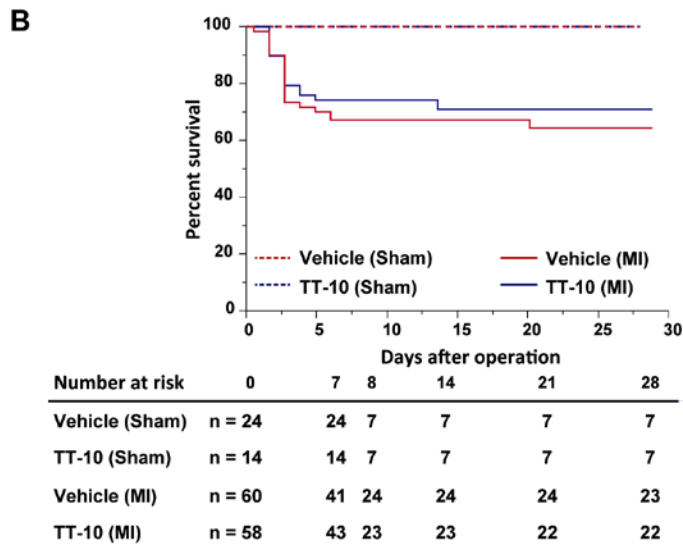

1

2 **Supplemental Figure 9. Experimental design and effect of TT-10 on 30-day survival rate after MI**

3 (A) Experimental design. Mice were randomly to assigned in a 1:1 ratio to receive vehicle or TT-10  
 4 intraperitoneally after the MI procedure. (B) Kaplan-Meier survival curve for mice treated with vehicle  
 5 or TT-10. There was no significant difference in 30-day survival after the MI procedure between the  
 6 treatment and control groups ( $p = 0.5322$ , log-rank test).

7

8

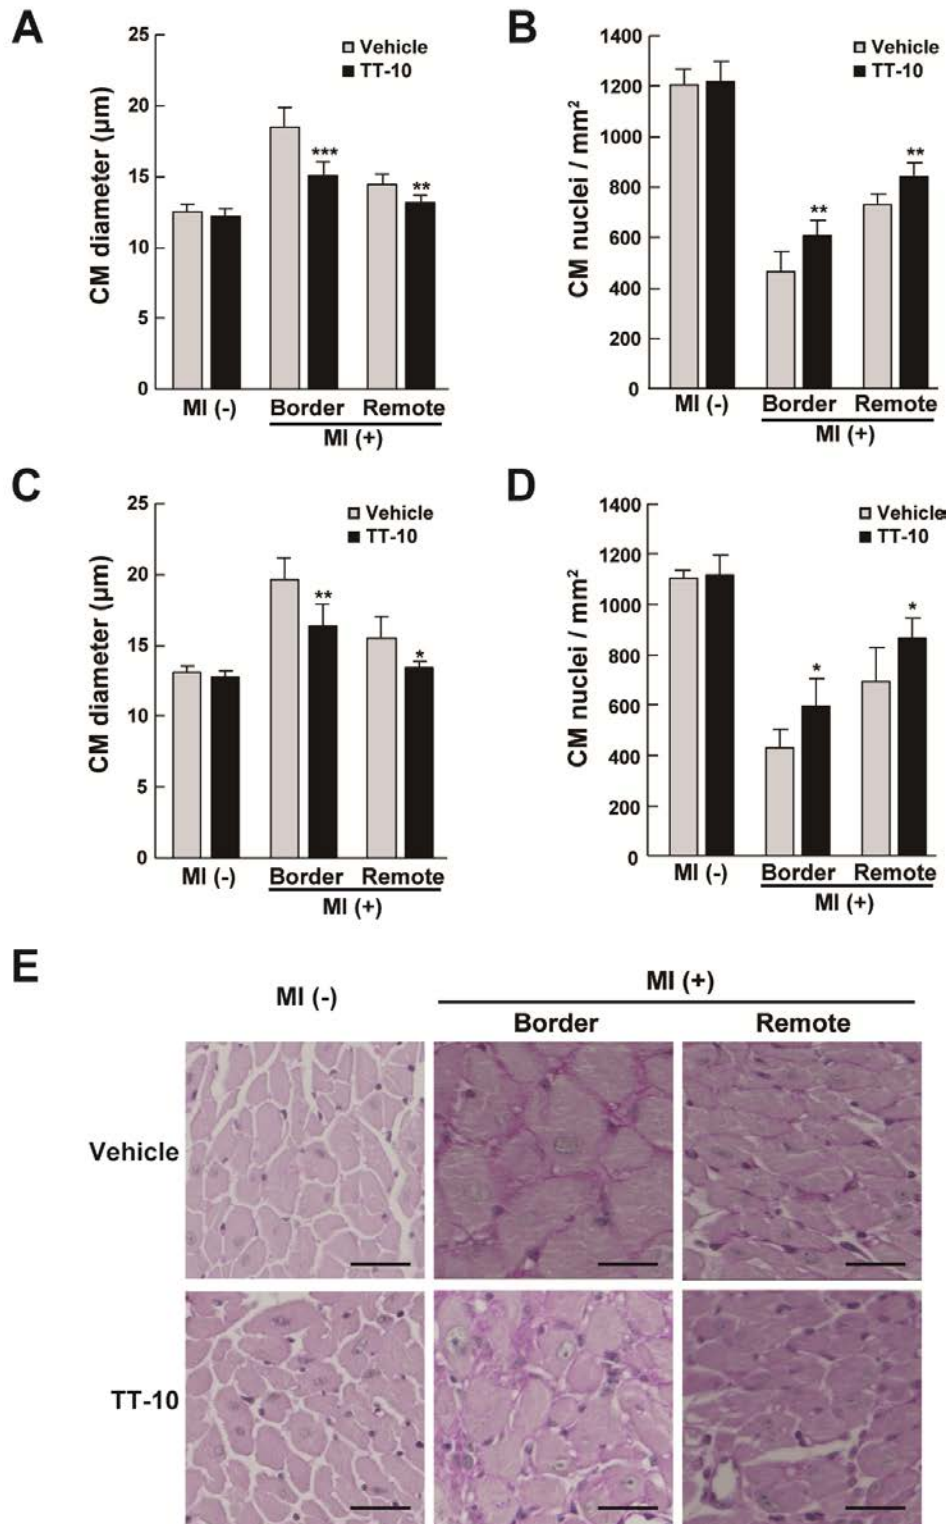

1  
2

3 **Supplemental Figure 10. TT-10 ameliorates MI-induced CM hypertrophy and decreased CM**  
4 **nuclear density**

5 (A-D) CM diameter (A, C) and nuclear density (B, D) were evaluated on PAS-stained tissues of the  
6 infarct border and the remote zone one (A, B) and four (C, D) weeks after the MI procedure. (A, B) n

1 = 5 (MI(-)), 6 (MI(+) + vehicle), and 7 (MI(+) + TT-10). (C, D) n = 5 (MI(-)), 5 ((MI(+) + vehicle), and  
2 6 (MI(+) + TT-10). (E) Representative images of the myocardium at 1 week following the MI procedure.  
3 Scale bars: 25  $\mu$ m. \* $p$  < 0.05, \*\* $p$  < 0.01, \*\*\* $p$  < 0.001 versus vehicle control.  
4

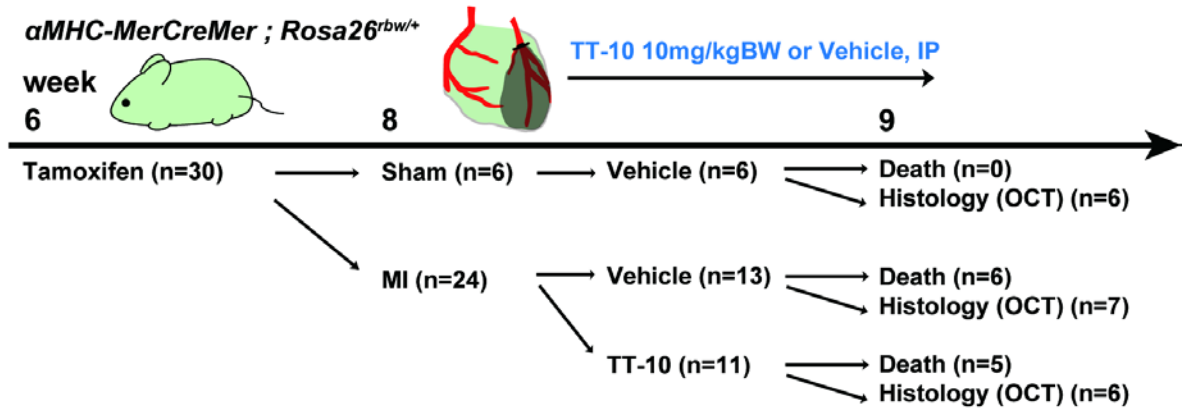

1  
2  
3  
4  
5  
6

**Supplemental Figure 11. Experimental design of the lineage tracing experiment of existing CMs**  
*αMHC-MerCreMer; Rosa26<sup>rbw/+</sup>* mice were used in the lineage tracing experiment of existing CMs.  
 Mice were randomly assigned in a 1:1 ratio to receive vehicle or TT-10 after the MI procedure.

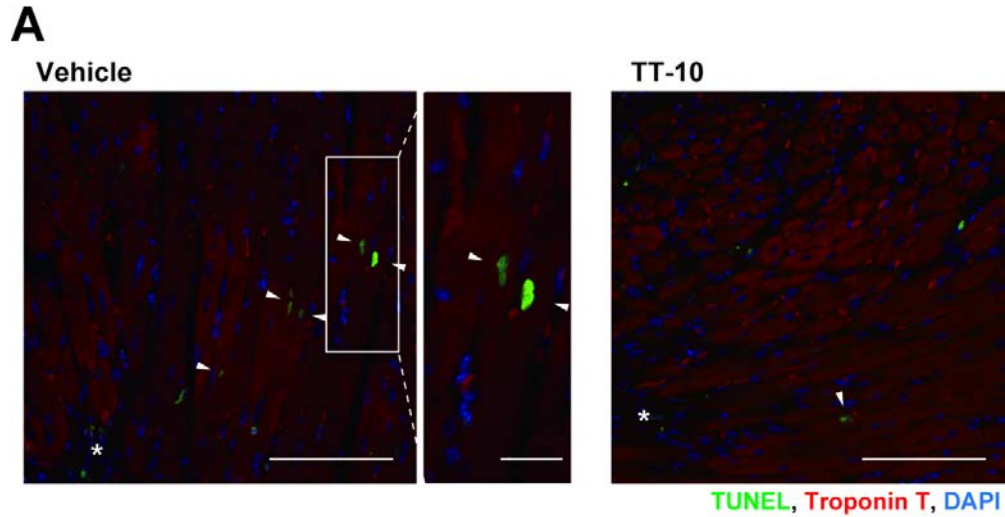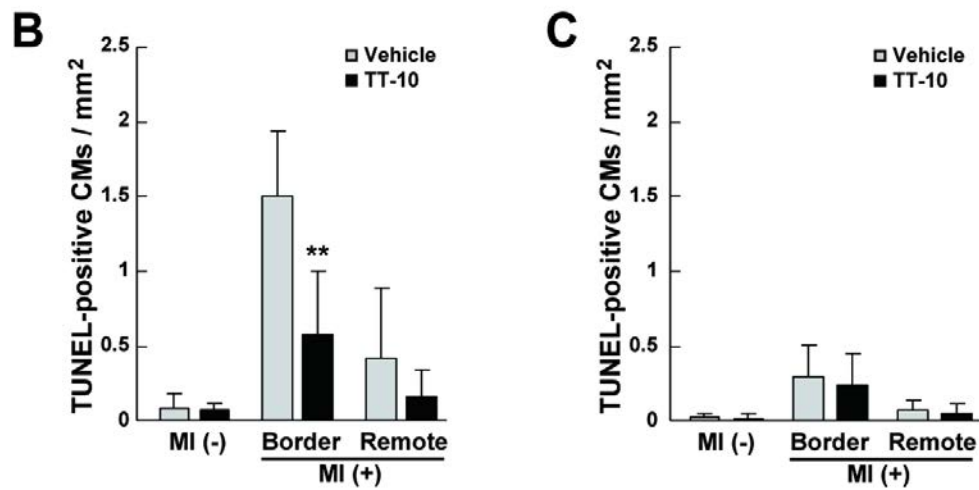

1  
2  
3  
4  
5  
6  
7  
8  
9

**Supplemental Figure 12. TT-10 reduces MI-induced TUNEL-positive apoptosis**

(A) Representative images of the myocardium at 1 week following the MI procedure. Arrow heads, TUNEL-positive CMs; asterisk, infarct area. Scale bars: 100 µm; 25 µm in inset. (B, C) TUNEL-positive CMs were evaluated in the infarct border and the remote zone one (B) and four (C) weeks after the MI procedure. (B) n = 7 (MI(-)), 6 (MI(+)) + vehicle), and 7 (MI(+)) + TT-10). (C) n = 5 (MI(-)), and 7 ((MI(+)). \*\* $p < 0.01$  versus vehicle control.

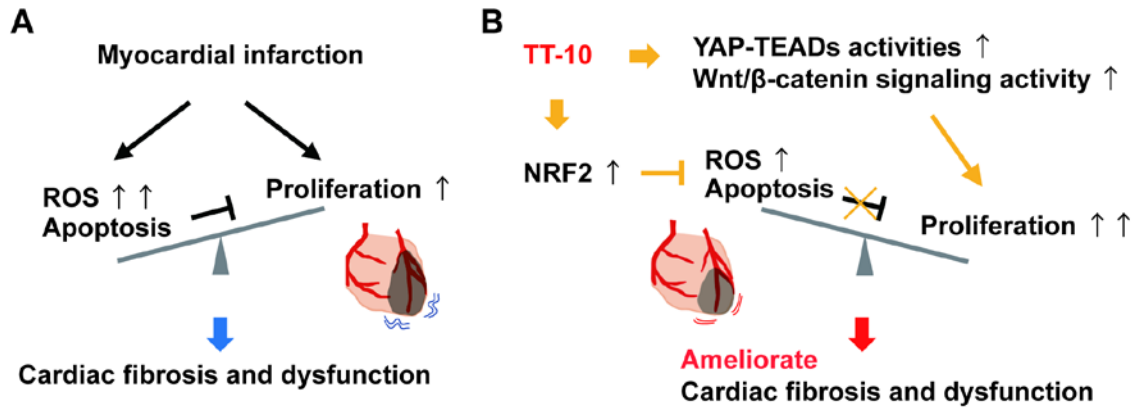

1  
2  
3  
4  
5  
6  
7  
8  
9

**Supplemental Figure 13 Schematic diagram of the effects of TT-10**

(A) MI stimulates both ROS generation and apoptosis in CMs and CM proliferation, however, the excessive ROS production rather inhibits CM regenerative capacity and promotes cardiac dysfunction.

(B) A novel fluorine compound TT-10 protects CMs from ROS and resultant apoptosis by activating NRF2 transcription factor, and increases CM proliferation activity by enhancing YAP-TEADs activities and Wnt/β-catenin signaling. TT-10 can ameliorate cardiac remodeling after MI.



## 1 Supplemental References

- 2 1. Takeda N., Manabe I., Uchino Y., et al. Cardiac fibroblasts are essential for the adaptive  
3 response of the murine heart to pressure overload. *J Clin Invest* 2010;120(1):254–65.
- 4 2. Maruyama J., Inami K., Michishita F., et al. Novel YAP1 Activator, Identified by  
5 Transcription-Based Functional Screen, Limits Multiple Myeloma Growth. *Mol Cancer Res*  
6 2018;16(2):197–211.
- 7 3. Yang Z., Nakagawa K., Sarkar A., et al. Screening with a novel cell-based assay for TAZ  
8 activators identifies a compound that enhances myogenesis in C2C12 cells and facilitates  
9 muscle repair in a muscle injury model. *Mol Cell Biol* 2014;34(9):1607–21.
- 10 4. Ota M., Sasaki H. Mammalian Tead proteins regulate cell proliferation and contact inhibition  
11 as transcriptional mediators of Hippo signaling. *Development* 2008;135(24):4059–69.
- 12 5. Bao Y., Nakagawa K., Yang Z., et al. A cell-based assay to screen stimulators of the Hippo  
13 pathway reveals the inhibitory effect of dobutamine on the YAP-dependent gene transcription.  
14 *J Biochem* 2011;150(2):199–208.
- 15 6. Dupont S., Morsut L., Aragona M., et al. Role of YAP/TAZ in mechanotransduction. *Nature*  
16 2011;474(7350):179–83.
- 17 7. Wang G., Yeh HI., Lin JJC. Characterization of cis-regulating elements and trans-activating  
18 factors of the rat cardiac troponin T gene. *J Biol Chem* 1994;269(48):30595–603.
- 19 8. Furukawa M., Xiong Y. BTB protein Keap1 targets antioxidant transcription factor Nrf2 for  
20 ubiquitination by the Cullin 3-Roc1 ligase. *Mol Cell Biol* 2005;25(1):162–71.
- 21 9. Fujimoto A., Furuta M., Totoki Y., et al. Whole-genome mutational landscape and  
22 characterization of noncoding and structural mutations in liver cancer. *Nat Genet*  
23 2016;48(5):500–9.
- 24 10. Huang DW., Lempicki R a., Sherman BT. Systematic and integrative analysis of large gene  
25 lists using DAVID bioinformatics resources. *Nat Protoc* 2009;4(1):44–57.
- 26 11. Toko H., Takahashi H., Kayama Y., et al. ATF6 is important under both pathological and  
27 physiological states in the heart. *J Mol Cell Cardiol* 2010;49(1):113–20.
- 28 12. Weil BR., Suzuki G., Leiker MM., Fallavollita JA., Cauty JM. Comparative Efficacy of  
29 Intracoronary Allogeneic Mesenchymal Stem Cells and Cardiosphere-Derived Cells in Swine  
30 with Hibernating Myocardium. *Circ Res* 2015;117(7):634–44.
- 31 13. Schonbrunn E., Betzi S., Alam R., et al. Development of highly potent and selective  
32 diaminothiazole inhibitors of cyclin-dependent kinases. *J Med Chem* 2013;56(10):3768–82.
- 33 14. Bowler AN., Olesen PH., SØRENSEN AR., Hansen BF., Worsaae H., Kurtzhals P. 2,4-  
34 diaminothiazole derivatives and their use as glycogen synthase kinase-3 (gsk-3) inhibitors.

- 1 PCT Int Pat Appl 2001:WO 01/56567 A1.
- 2 15. Chithralekha Devi SK., Rajasekharan KN. Synthesis of 2,4-Diamino-5- (Fur-2-Oyl), (Thien-2-
- 3 Oyl), and (Pyrid-2-Oyl)Thiazoles. Synth Commun 2002;32(10):1523–8.
- 4
